# Supplementary material for: miR-181a initiates and perpetuates oncogenic transformation through the regulation of innate immune signaling
Source: PubMed Central journal article supplement (PMC7320168; doi:10.1038/s41467-020-17030-w), 2020-06-26
Supplement: 41467_2020_17030_MOESM1_ESM.pdf [file 41467_2020_17030_MOESM1_ESM.pdf]

## **Supplementary Information**

**miR-181a initiates and perpetuates oncogenic transformation  
through the regulation of innate immune signaling**

**Knarr et al.**

Supplementary Figure 1

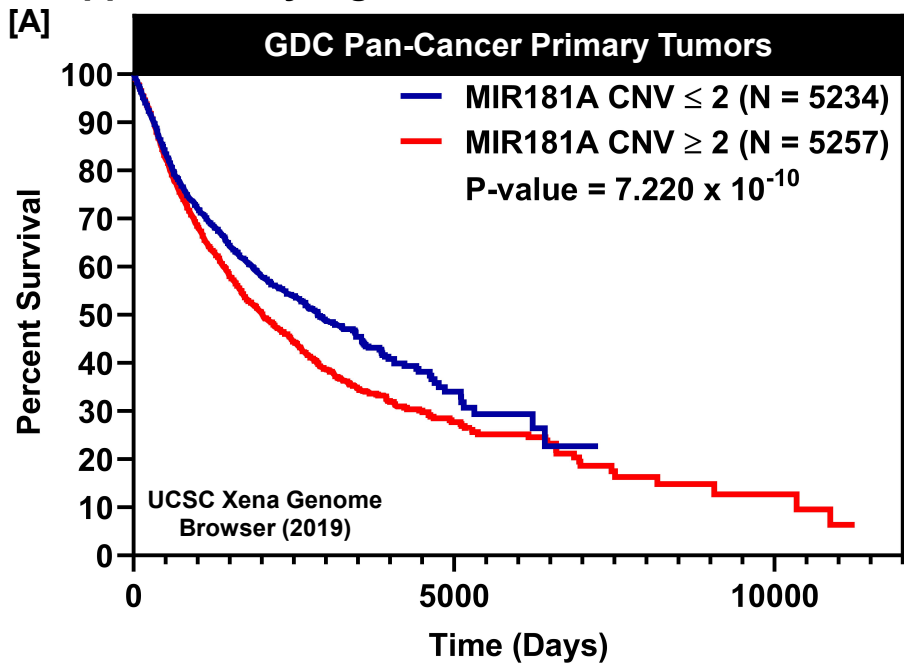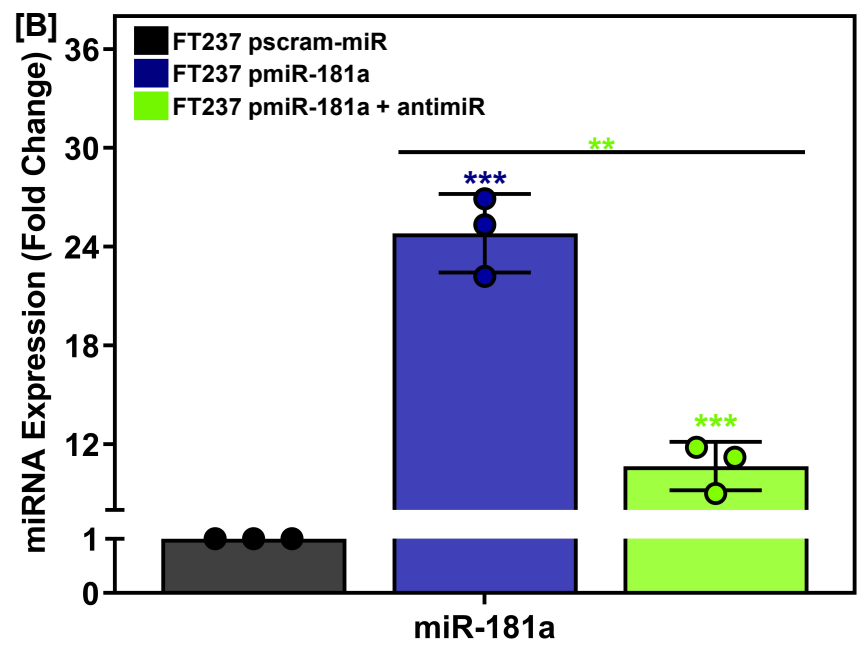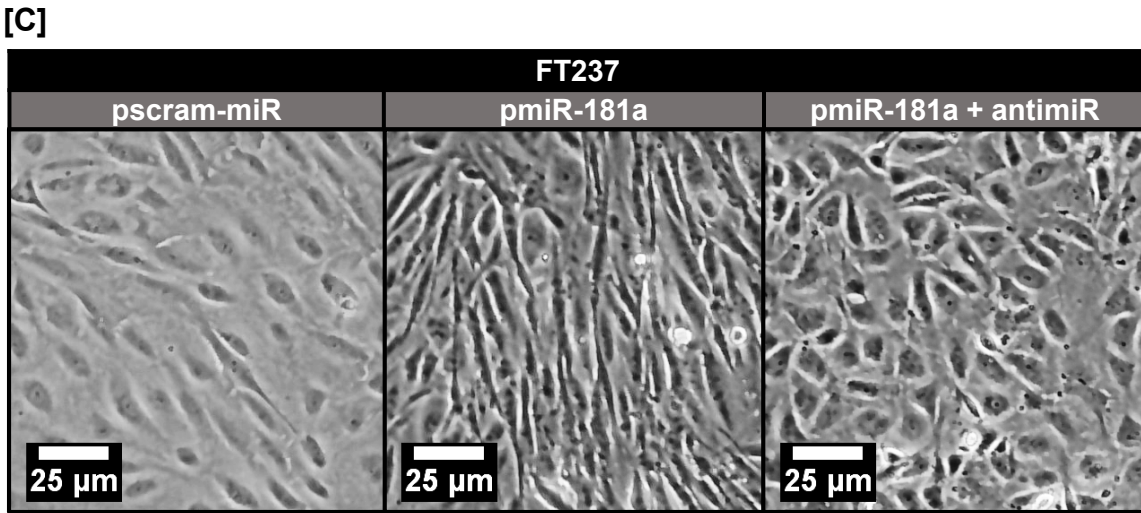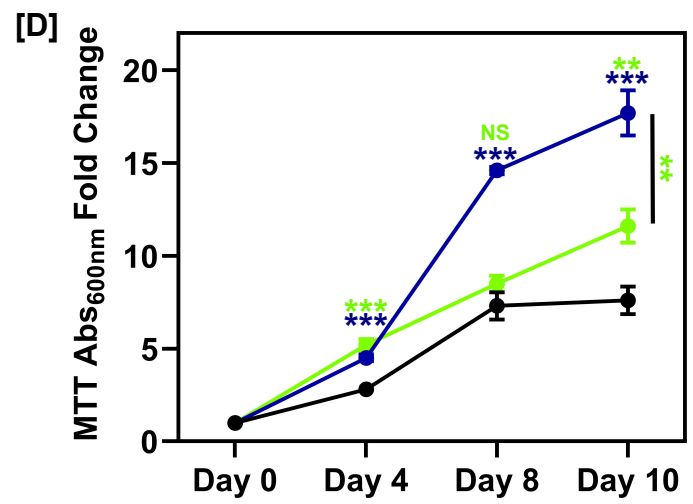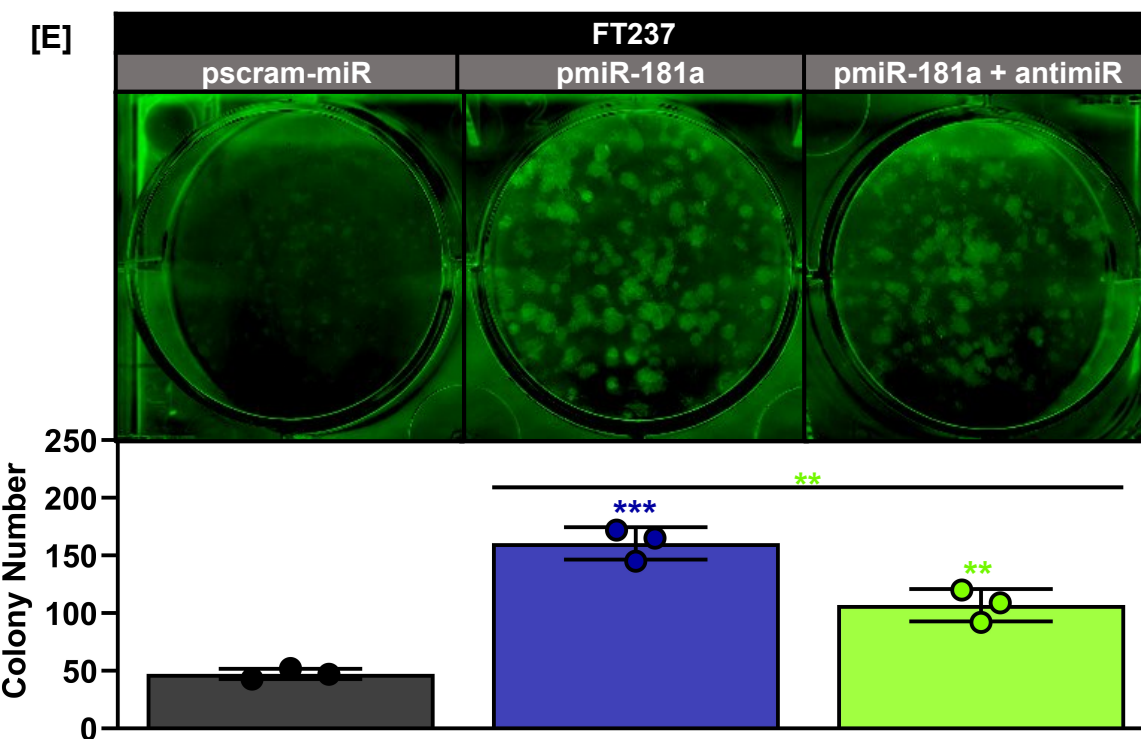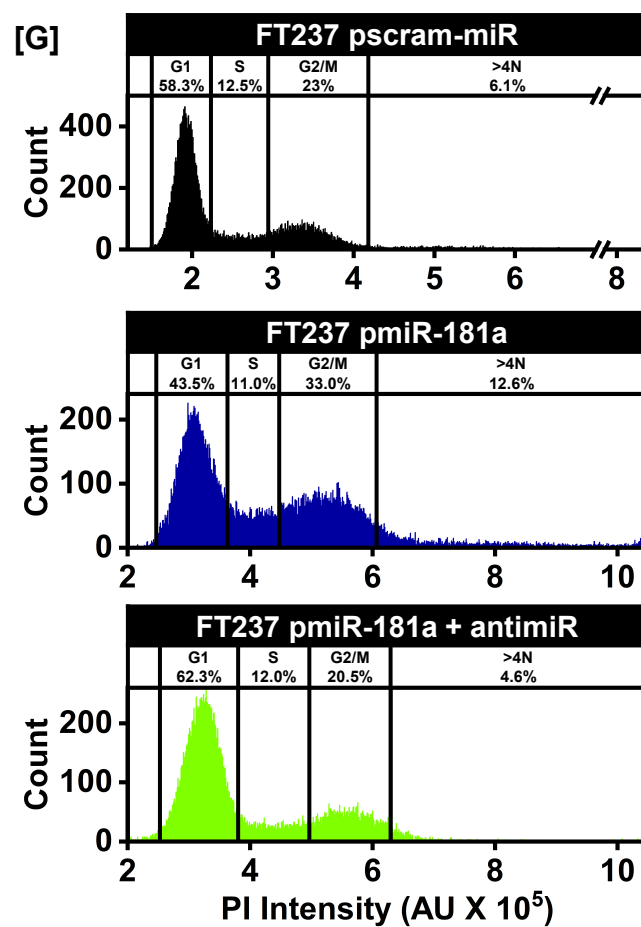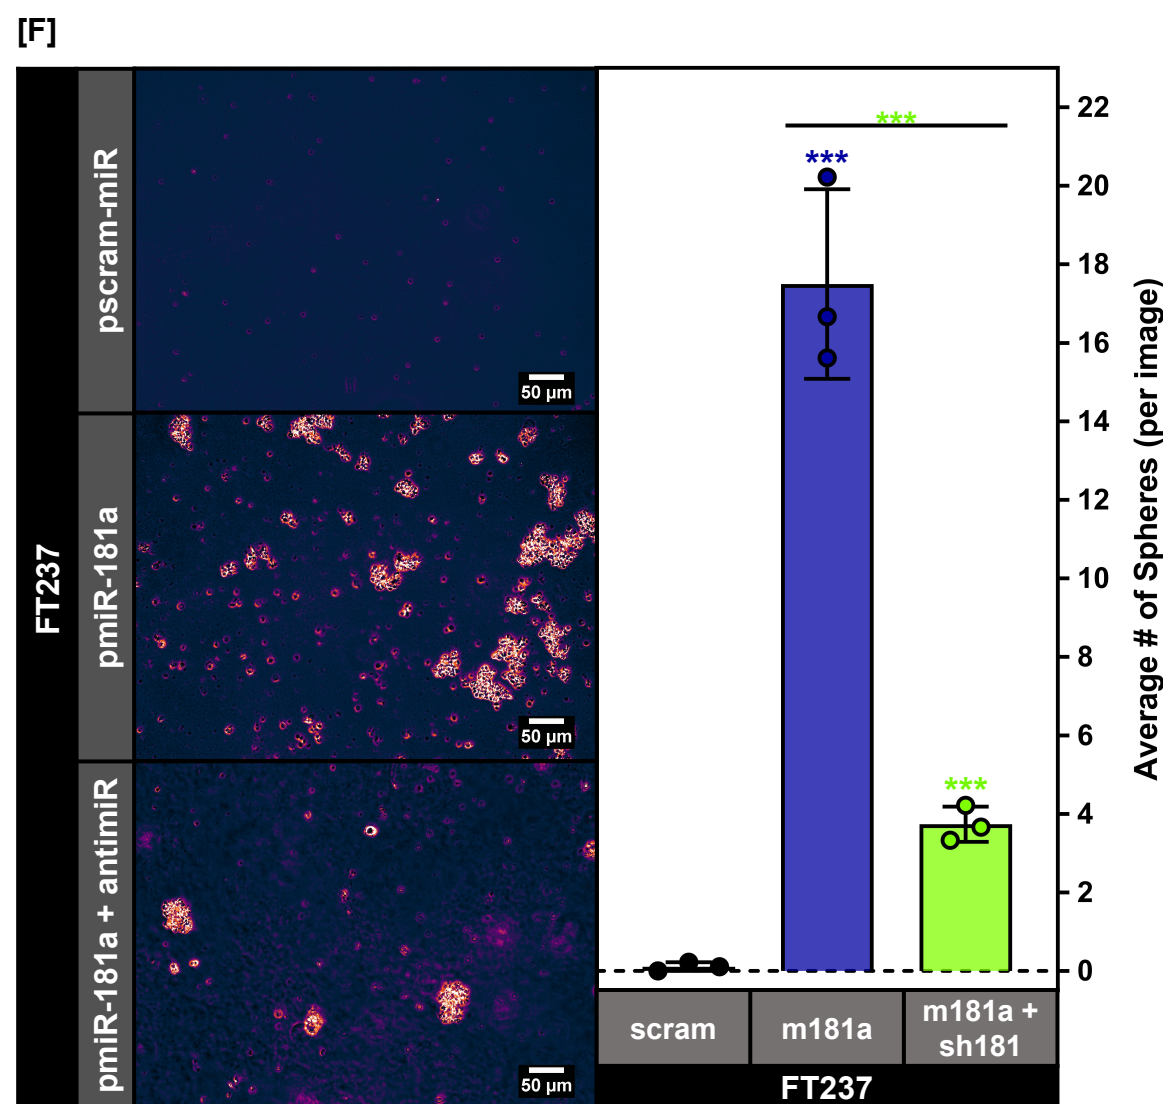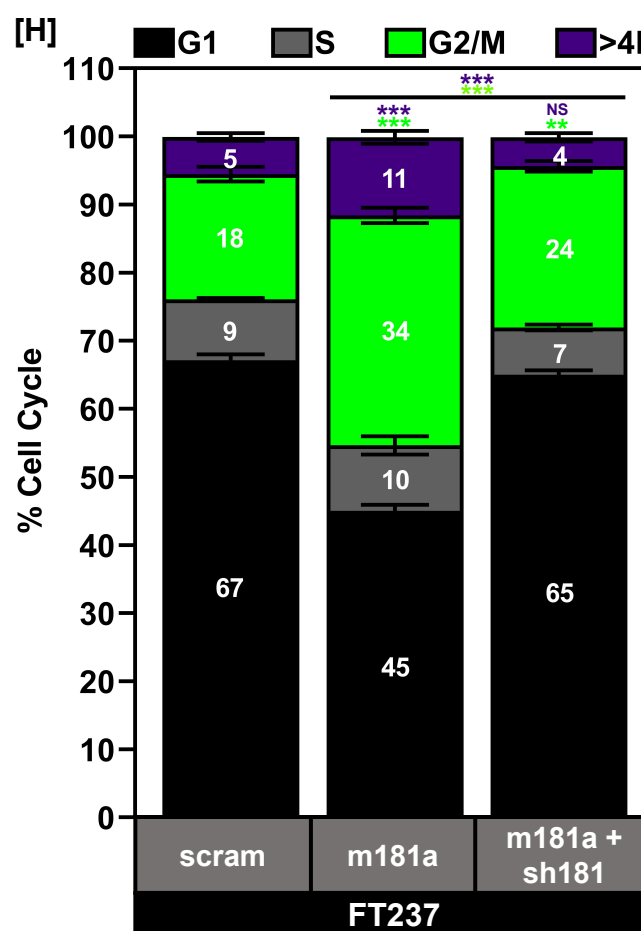

Supplementary Figure 1: Addition of miR-181a antagomiR inhibits the in vitro transformation phenotype of miR-181a overexpression in FTSECs

A) Pan-Cancer Analysis through the use of the UCSC Xena Genome Browser showed that patients with primary tumors which harbored amplification of miR-181a succumb to their disease significantly faster. The log-rank test was used for statistical analysis of survival curves. P-value shown is log-rank adjusted. B) Graph showing miR-181a expression levels for the FT237 pscram-miR, pmiR-181a, and pmiR-181a + antimiR cell lines. C) Phase contrast micrographs showing loss of contact inhibition in the FT pmiR-181a vs pscram-miR or pmiR-181a + antimiR cells. All cells were plated at the same time at equal density and allowed to grow for 10 days. D) Graph showing cell viability for FT237 pscram-miR, pmiR-181a, and pmiR-181a + antimiR cells. Significance values are color coded to match the corresponding FT237 cell line. E) Colony formation assay showing survival and colony formation for the FT237 pscram-miR, pmiR-181a, and pmiR-181a + antimiR cells with quantification (below). Colonies were stained with CellTag 700 at 10 days. Dashed green lines denote the culture plate well boundaries. F) Micrographs showing anchorage independent growth of FT237 pscram-miR, pmiR-181a, and pmiR-181a + antimiR cells with quantification (right). G) Representative graphs of cell cycle profiles for the FT237 pscram-miR, pmiR-181a, and pmiR-181a + antimiR cells. H) Bar graph of the % cell cycle sub-populations for FT237 pscram-miR, pmiR-181a, and pmiR-181a + antimiR cells. The cell cycle data for FT237 pscram-miR and pmiR-181a cells is the same as shown in Figure 1G. All data are representative of N = 3 independent experiments unless otherwise stated. The measure of center for the error bars is given as the mean value unless otherwise stated. The statistical test used for data analysis is the two-sided Student's t-test unless otherwise stated. Error bars indicate  $\pm$ standard deviation unless otherwise stated. \* =  $p < 0.05$ , \*\* =  $p < 0.005$ , \*\*\* =  $p < 0.0005$ .

Supplementary Figure 2

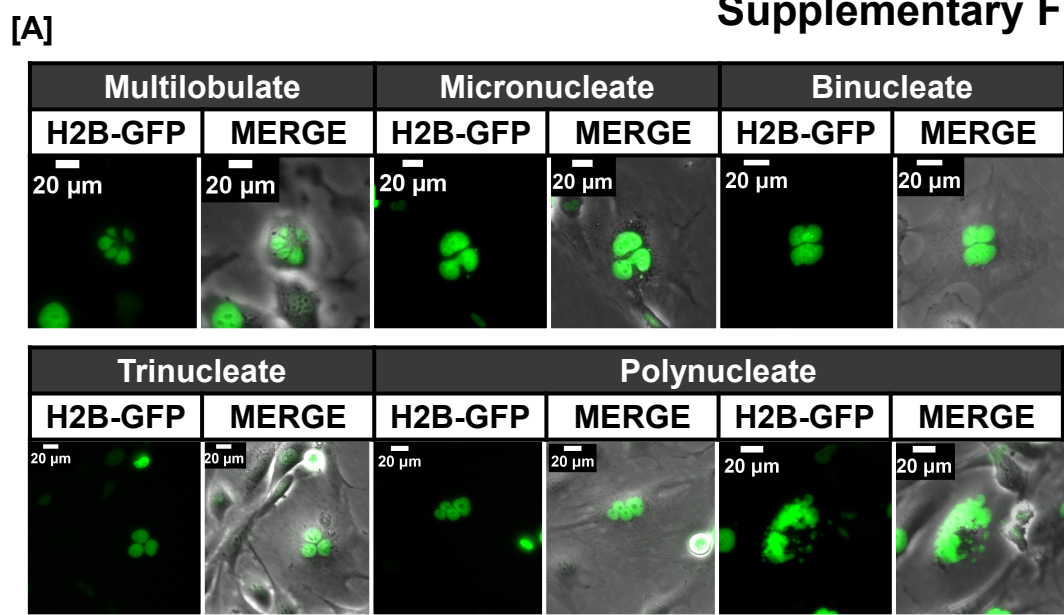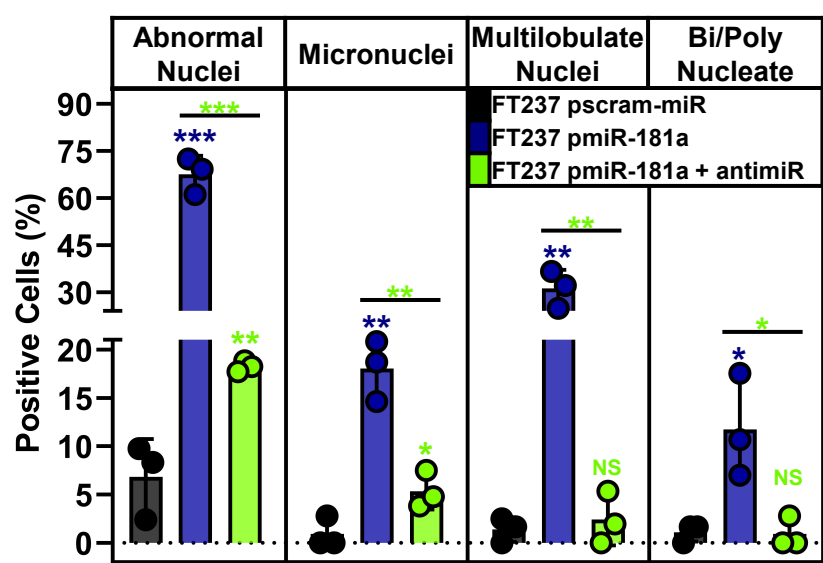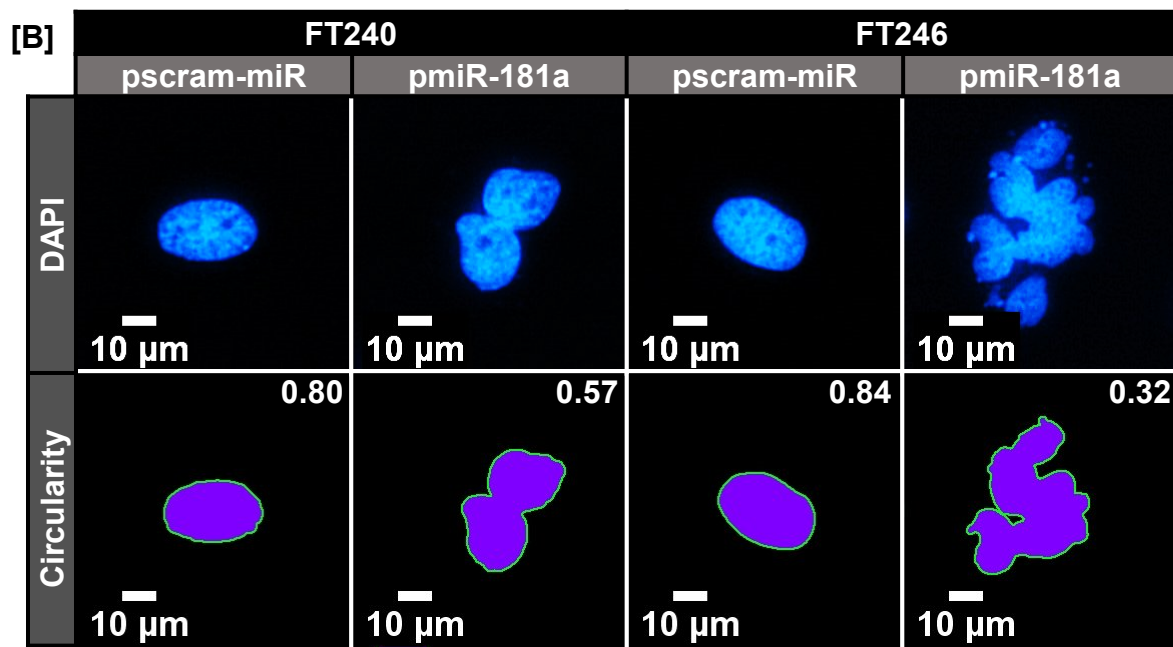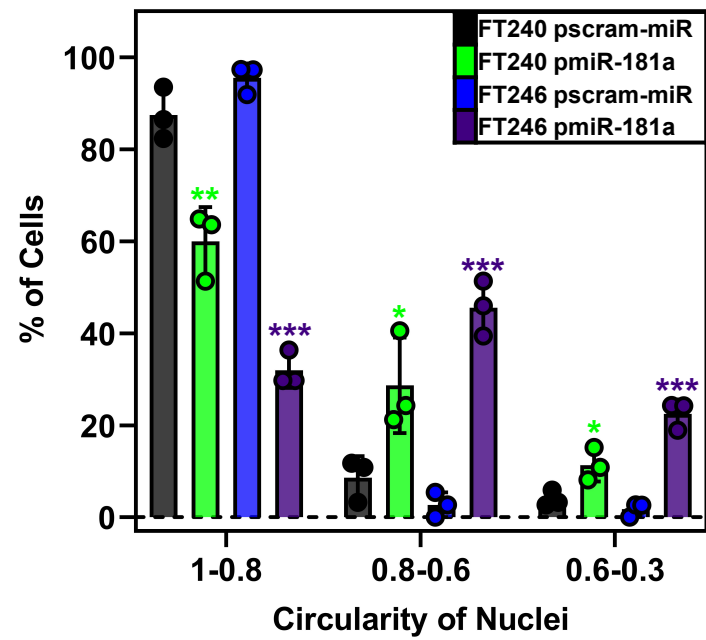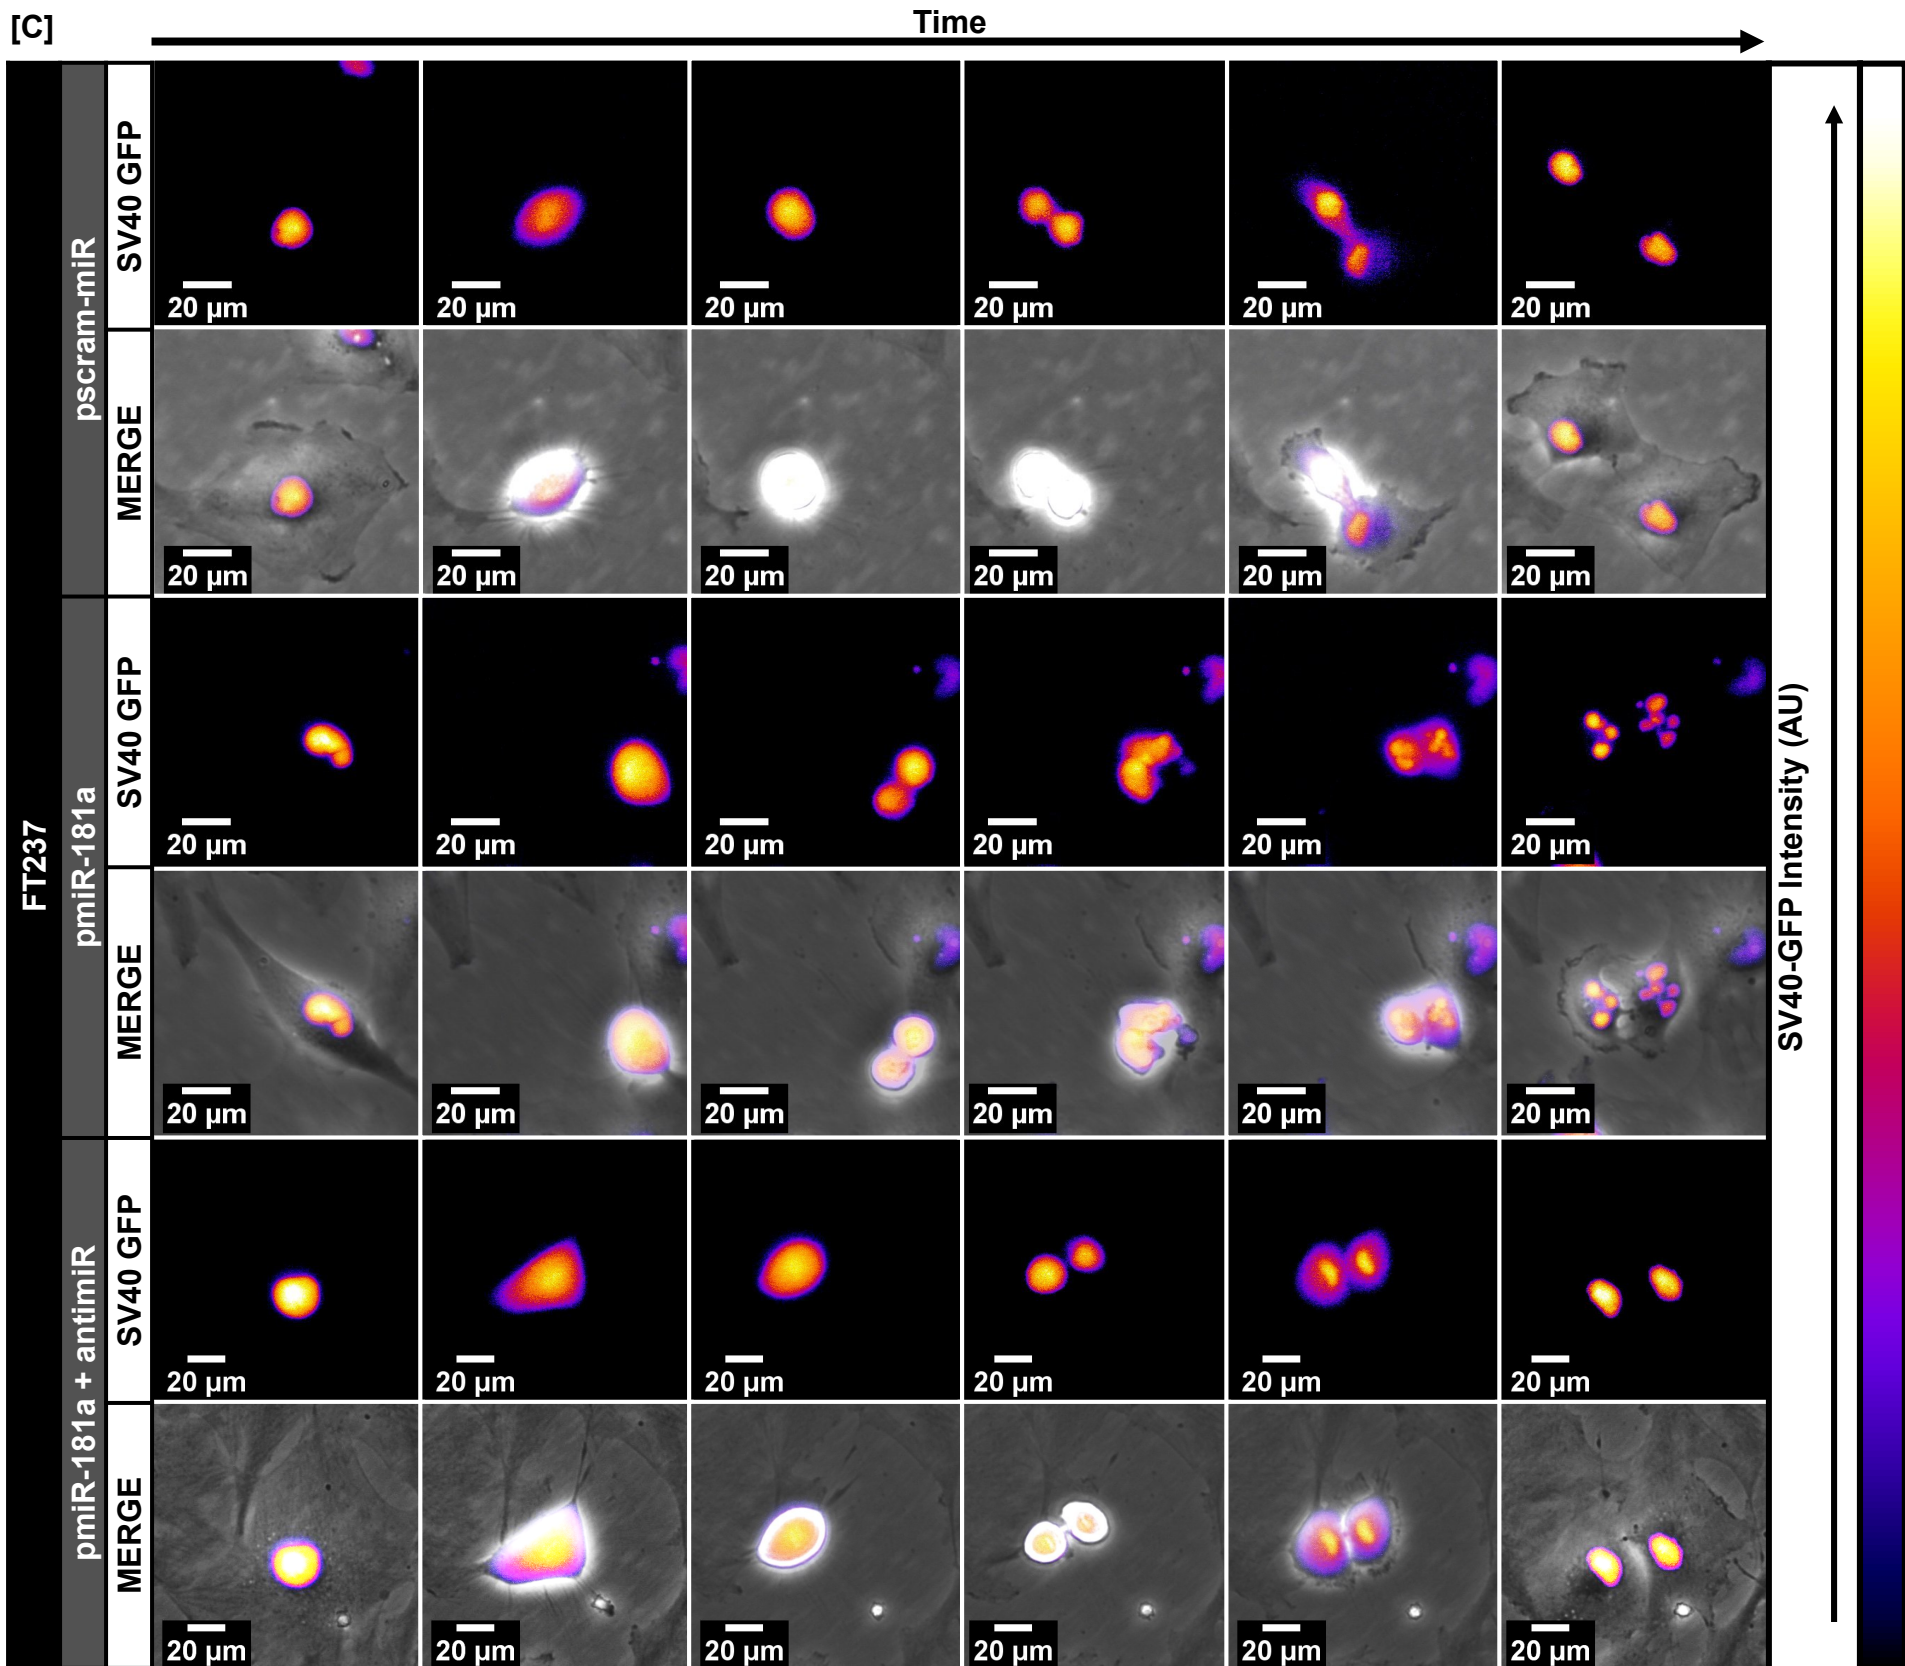

Supplementary Figure 2: miR-181a overexpression causes nuclear defects in FT237, FT240, and FT246 cells

A) Representative H2B-GFP and H2B-GFP/phase contrast merged micrographs of the types of nuclear defects seen in the FT237 pmiR-181a cells (left) and quantification of the defects (right). B) Immunofluorescence micrographs of representative DAPI stained nuclei (top), matched circularity masks with circularity value displayed in upper right hand corner (bottom), and graph showing the circularity distribution (right) from FT240 and FT246 pscram-miR and pmiR-181a cells. C) Time-lapse of SV40-GFP and SV40-GFP/phase contrast merged immunofluorescence images showing typical cell division along with parent and daughter nuclei in FT237 pscram-miR, pmiR-181a, and pmiR-181a + antimiR cells. All data are representative of N = 3 independent experiments unless otherwise stated. The measure of center for the error bars is given as the mean value unless otherwise stated. The statistical test used for data analysis is the two-sided Student's t-test unless otherwise stated. Error bars indicate  $\pm$ standard deviation unless otherwise stated. \* =  $p < 0.05$ , \*\* =  $p < 0.005$ , \*\*\* =  $p < 0.0005$ .

# Supplementary Figure 3

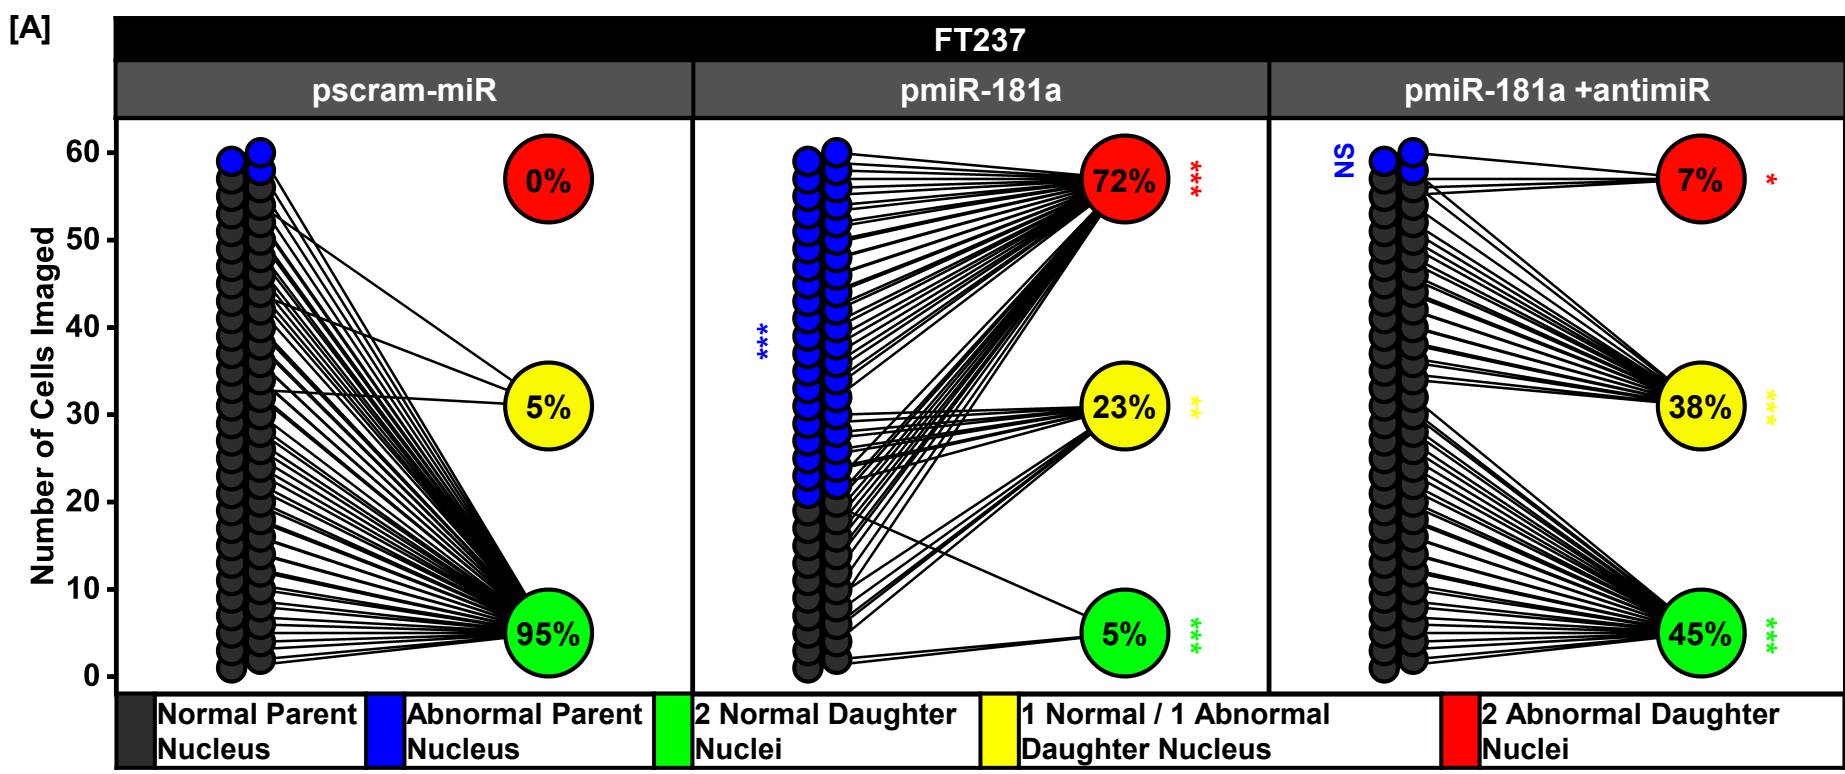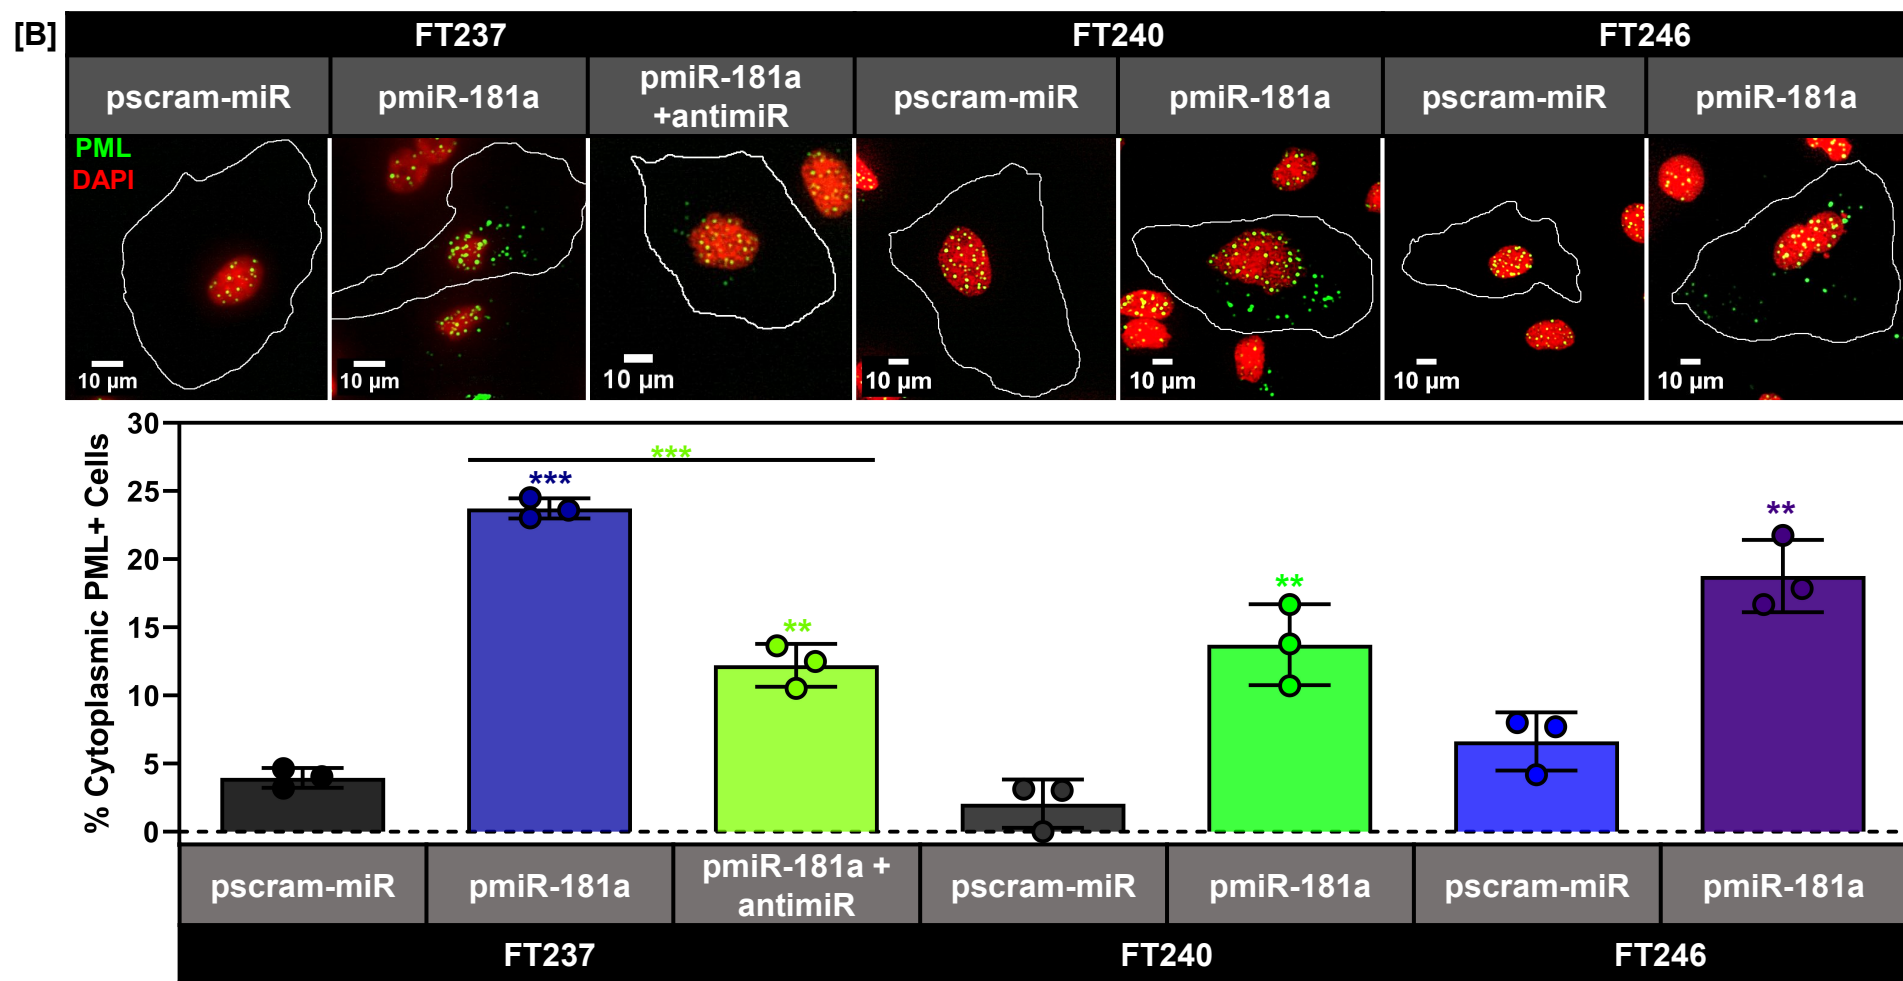

Supplementary Figure 3: miR-181a overexpression causes nuclear membrane rupture in FT237, FT240, and FT246 cells.

A) Plot showing nuclear shape status before and after cell division for FT237 pscram-miR, pmiR-181a, and pmiR-181a + antimiR cells with color key below. Chi-square analysis was used for statistical comparison between groups. B) Immunofluorescence micrographs of representative PML staining for the FT237 pscram-miR, pmiR-181a, pmiR-181a +antimiR, FT240 and FT246 pscram-miR and pmiR-181a cells. PML bodies are stained green, DAPI stained nuclei are colored red, and the outline of the cell is depicted in white. Quantification of the % cytoplasmic PML+ cells for each cell line is below. All data are representative of N = 3 independent experiments unless otherwise stated. The measure of center for the error bars is given as the mean value unless otherwise stated. The statistical test used for data analysis is the two-sided Student's t-test unless otherwise stated. Error bars indicate  $\pm$ standard deviation unless otherwise stated. \* =  $p < 0.05$ , \*\* =  $p < 0.005$ , \*\*\* =  $p < 0.0005$ .

# Supplementary Figure 4

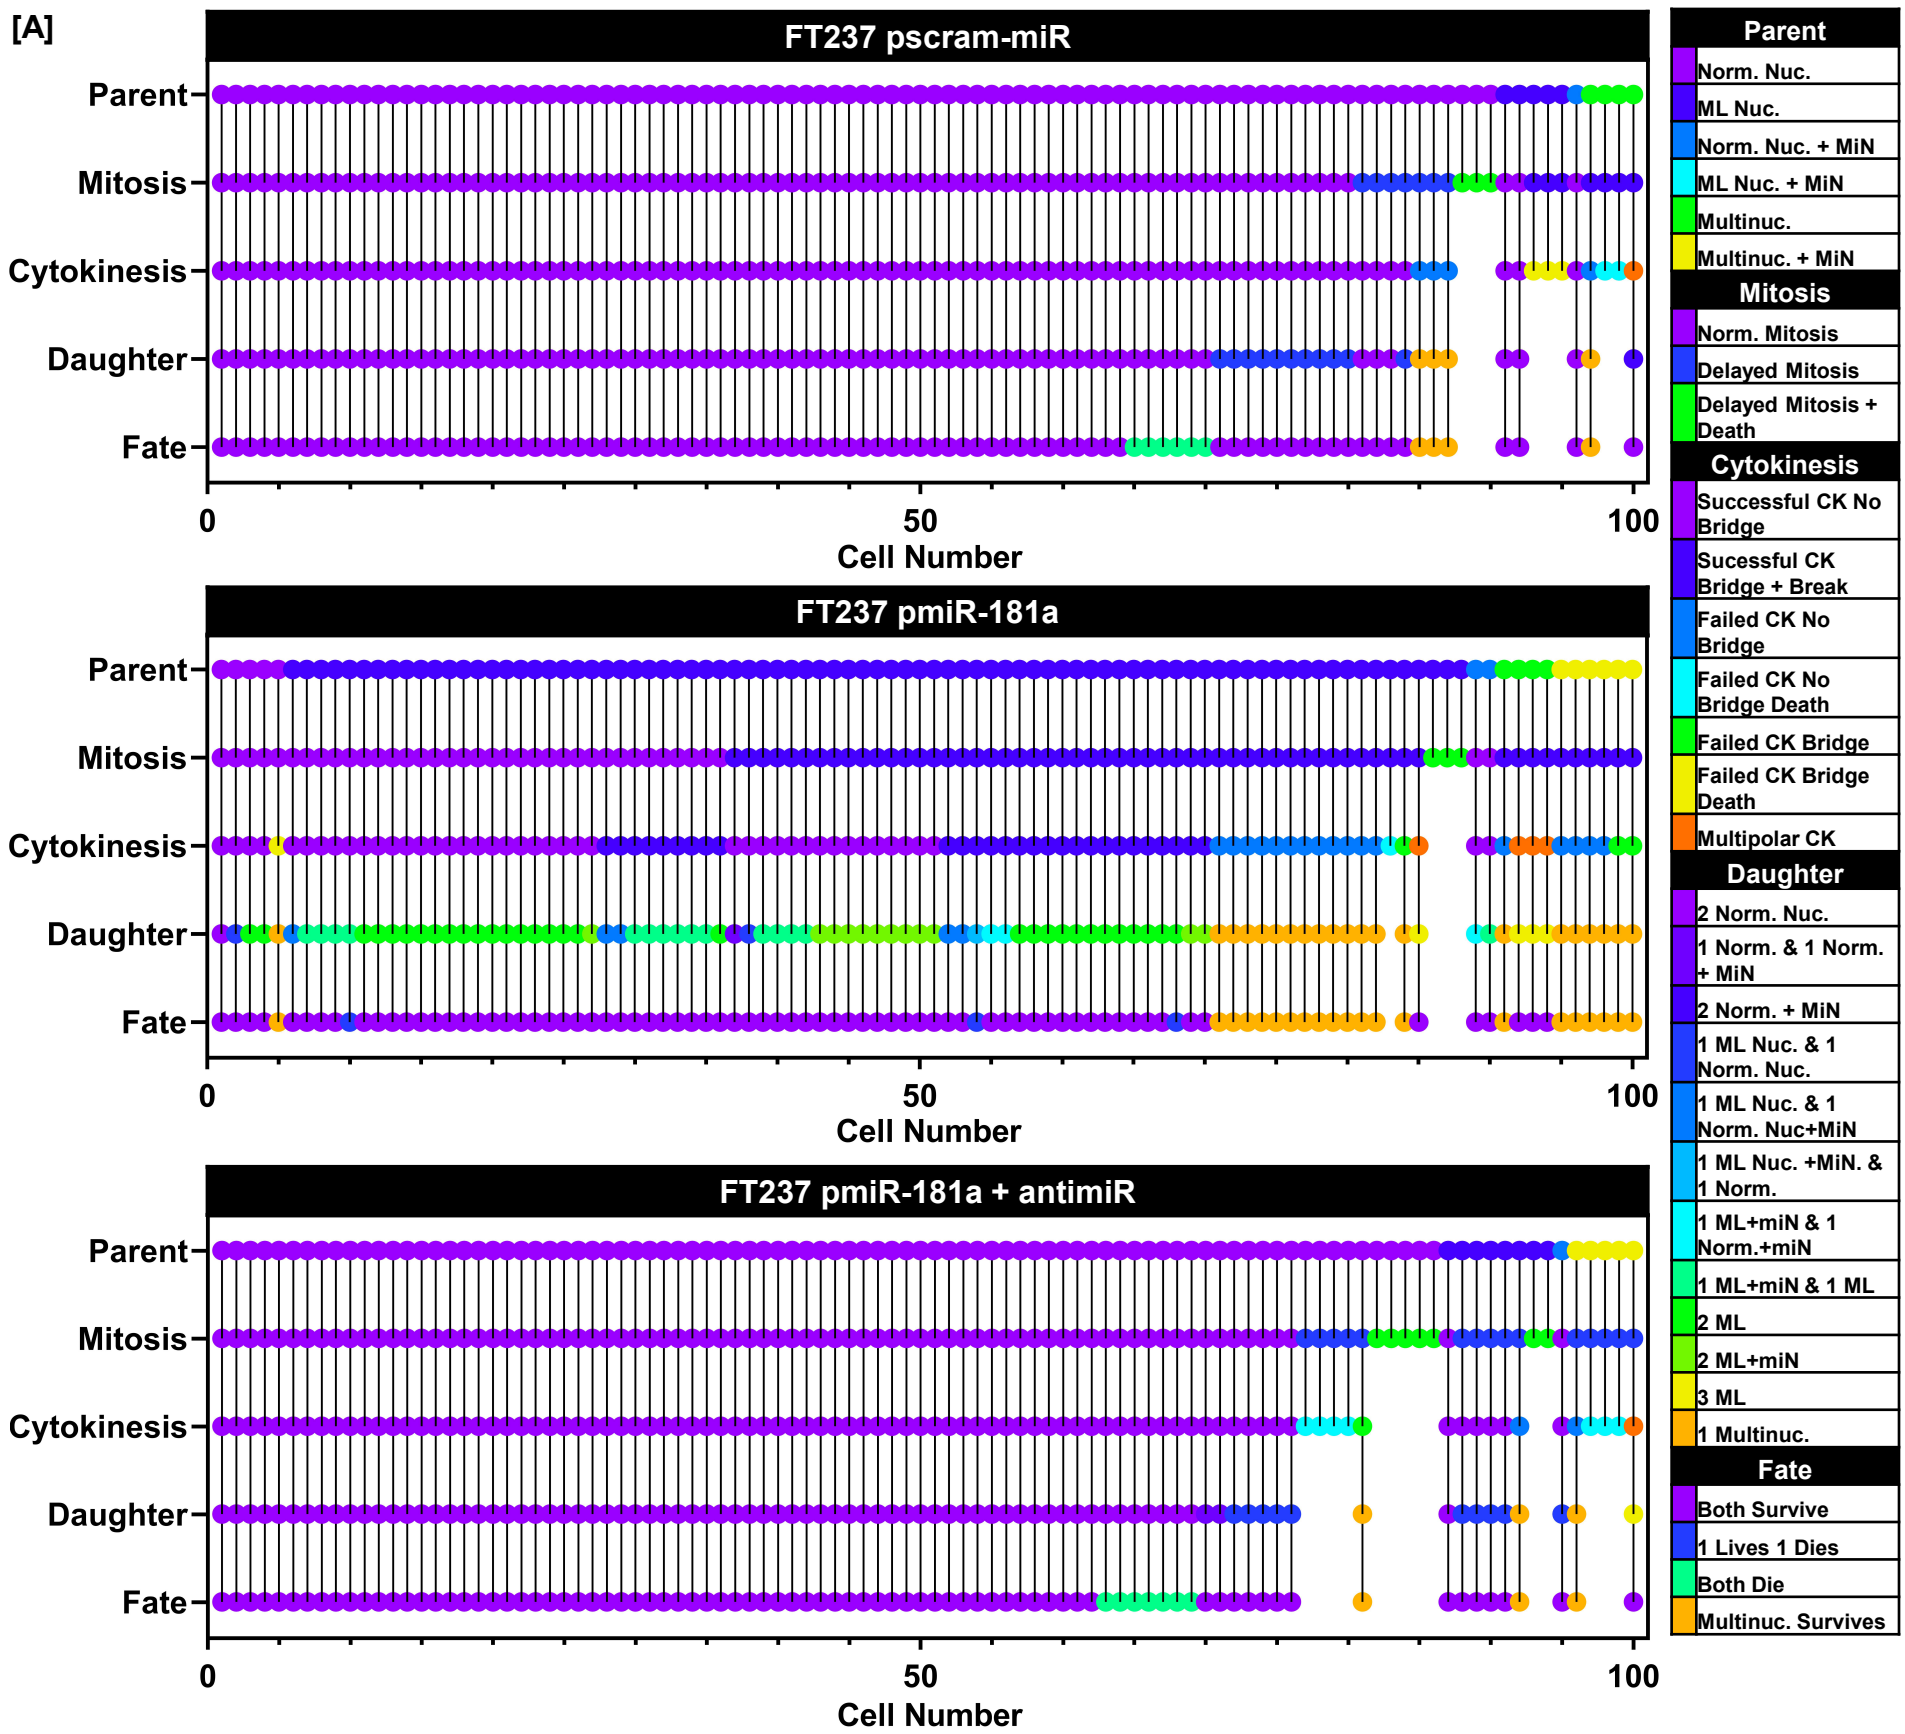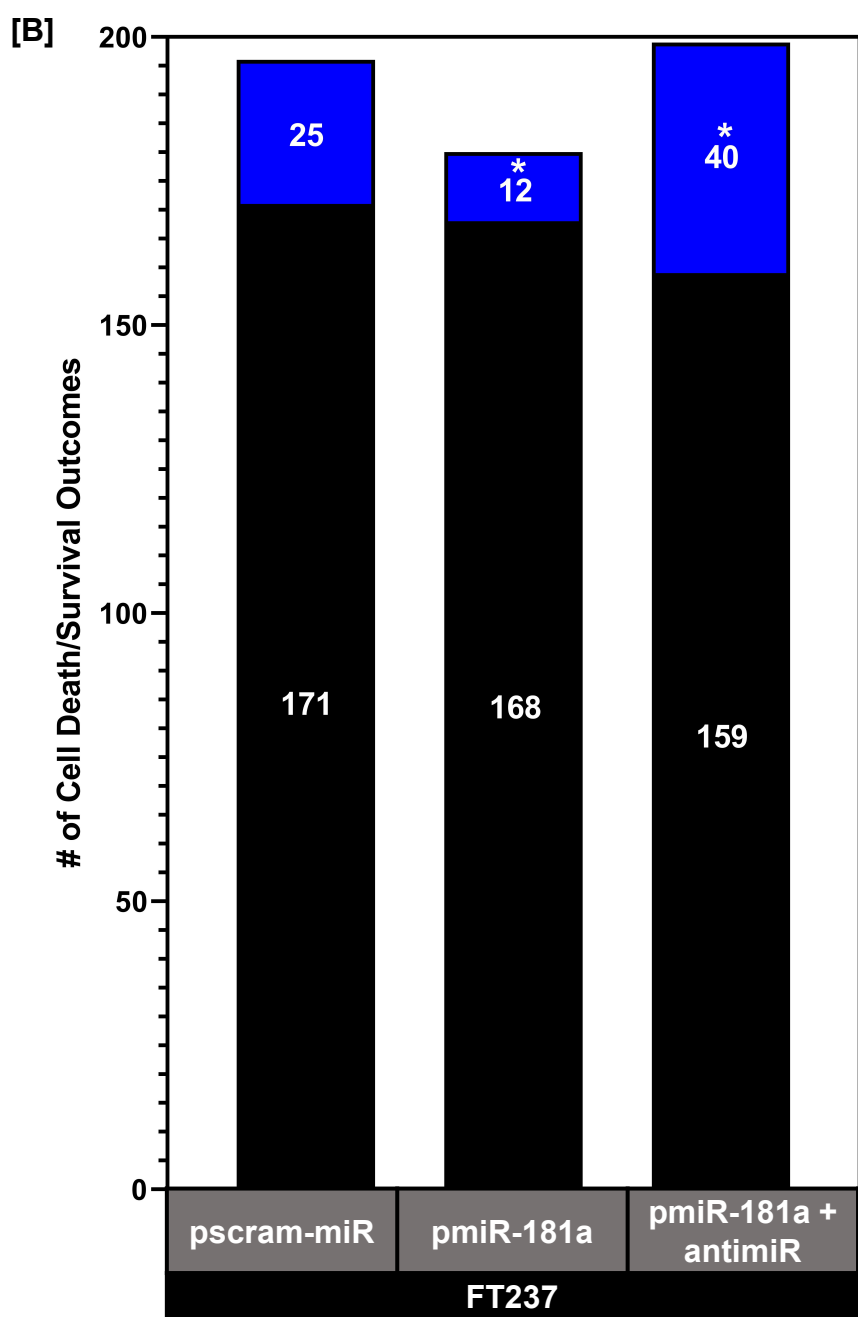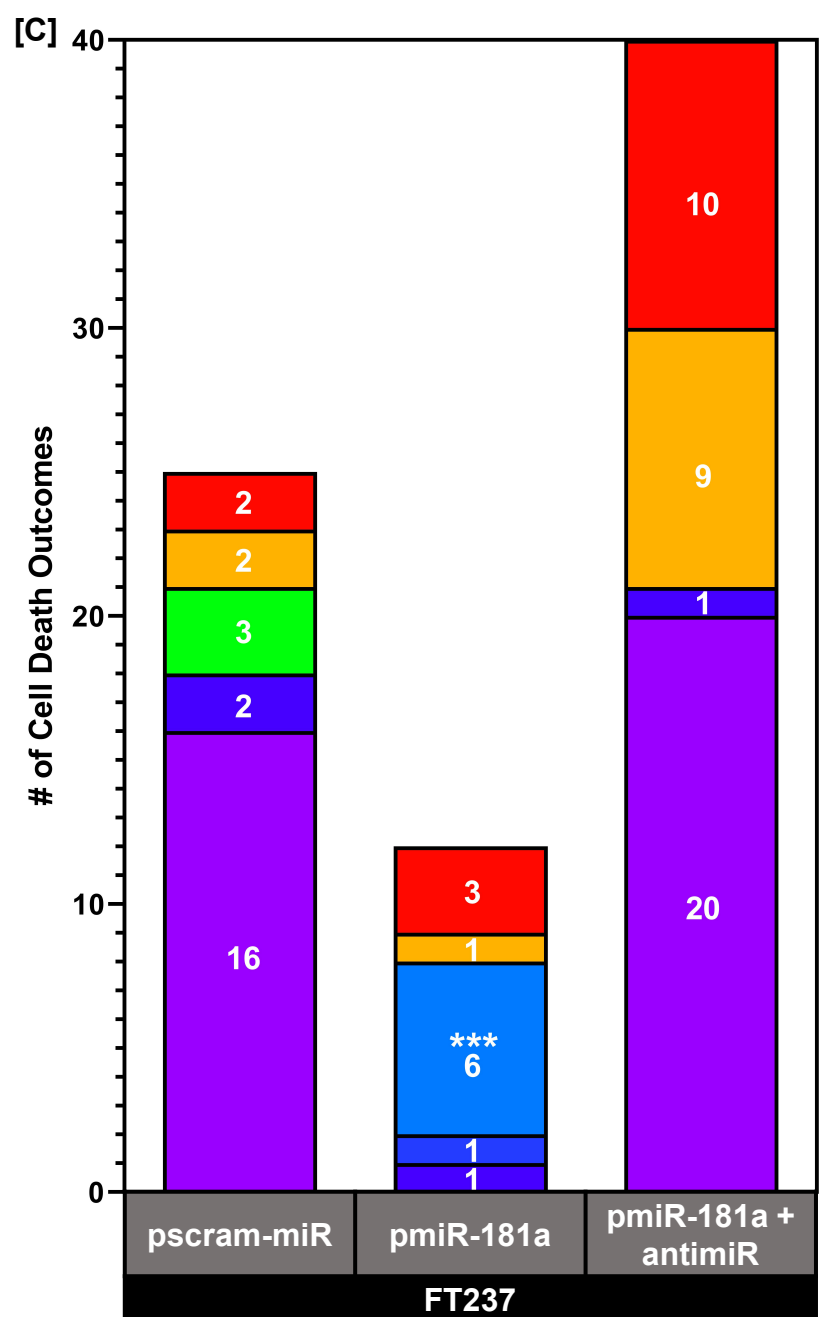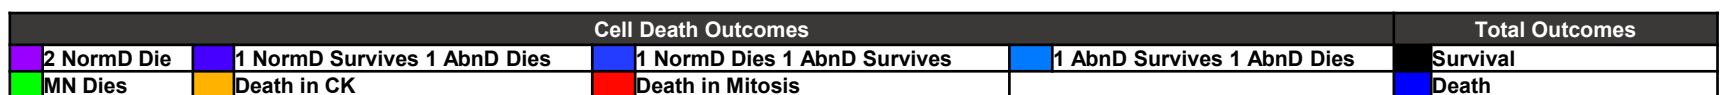



Supplementary Figure 4: miR-181a drives cytokinetic and mitotic defects without increasing death in FT237 cells

A) Graphs of detailed cell fate outcomes for FT237 pscram-miR, pmiR-181a, and pmiR-181a + antimiR cells. Each vertical set of connected dots represents a single cell undergoing division with the color of the dot representing a particular outcome at the corresponding stage of cell division. Color key with the various stages and outcomes is displayed on the right. B) Graph showing the number of cell death and cell survival outcomes for FT237 pscram-miR, pmiR-181a, and pmiR-181a + antimiR cells. C) Graph showing the number of cell death subtype outcomes for FT237 pscram-miR, pmiR-181a, and pmiR-181a + antimiR cells. Color keys for B) and C) are below. All data are representative of N = 3 independent experiments unless otherwise stated. The measure of center for the error bars is given as the mean value unless otherwise stated. Chi-square analysis was used for statistical comparison in 4B and 4C. The statistical test used for data analysis is the two-sided Student's t-test unless otherwise stated. Error bars indicate  $\pm$ standard deviation unless otherwise stated. \* =  $p < 0.05$ , \*\* =  $p < 0.005$ , \*\*\* =  $p < 0.0005$ .

### Supplementary Figure 5

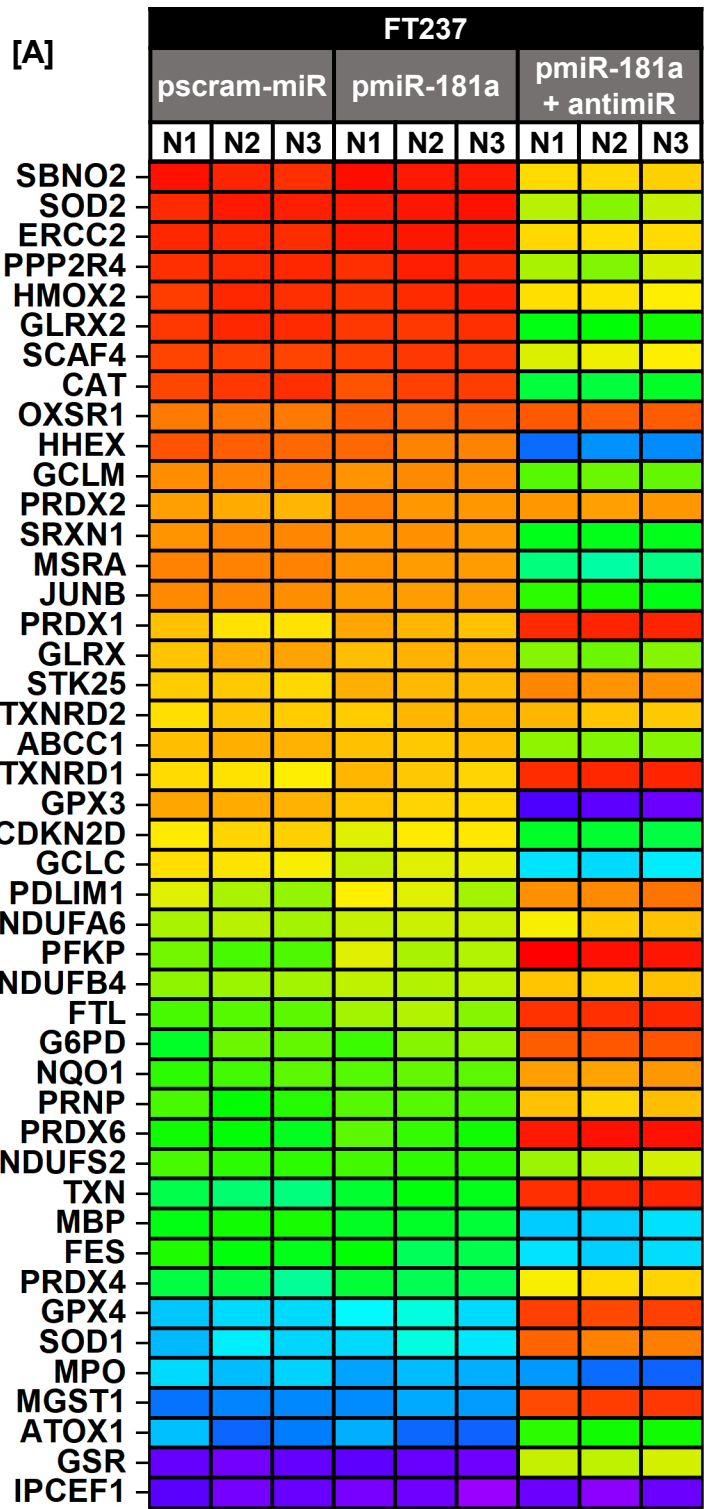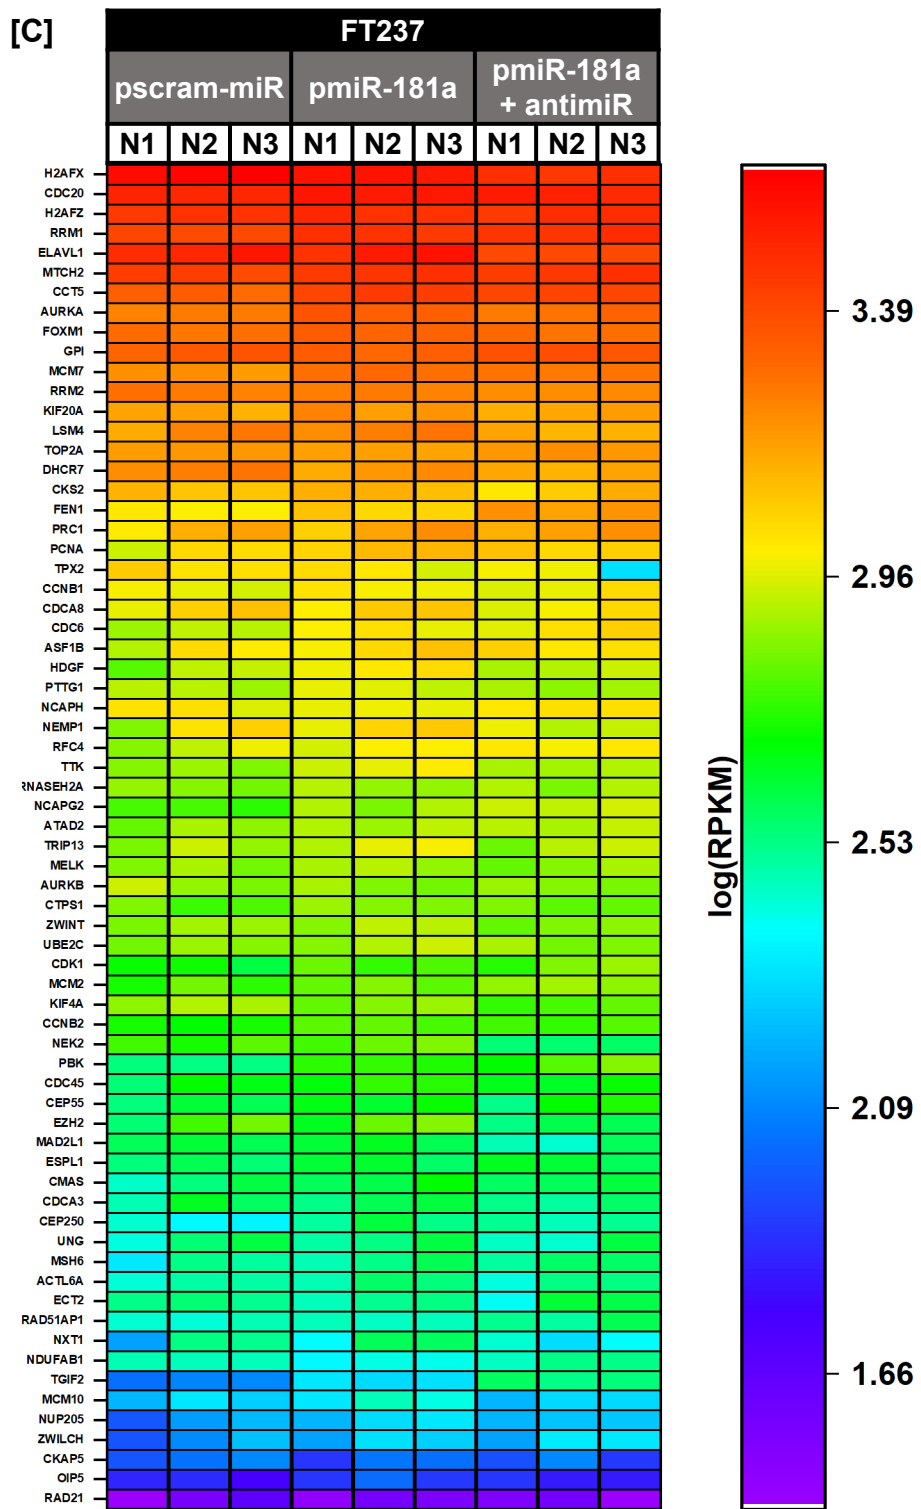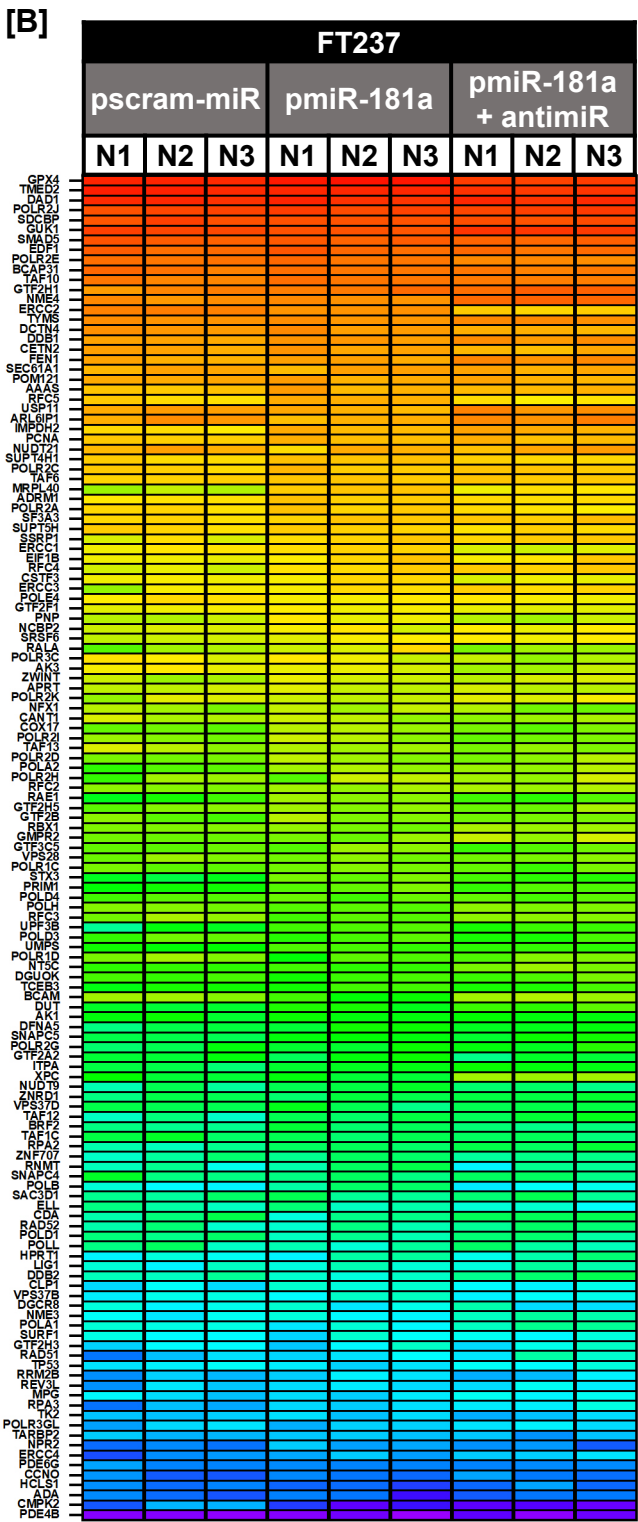

Supplementary Figure 5: GSEA of FT237 pmiR-181a cells shows enrichment of DNA damage and GI signatures

A-C) Full heatmaps of mRNA expression values from the DNA damage and GI GSEA analysis of FT237 microarray data. All data are representative of N = 3 independent experiments unless otherwise stated.

# Supplementary Figure 6

■ FT240 pscram-miR  
■ FT240 pmiR-181a  
■ FT246 pscram-miR  
■ FT246 pmiR-181a

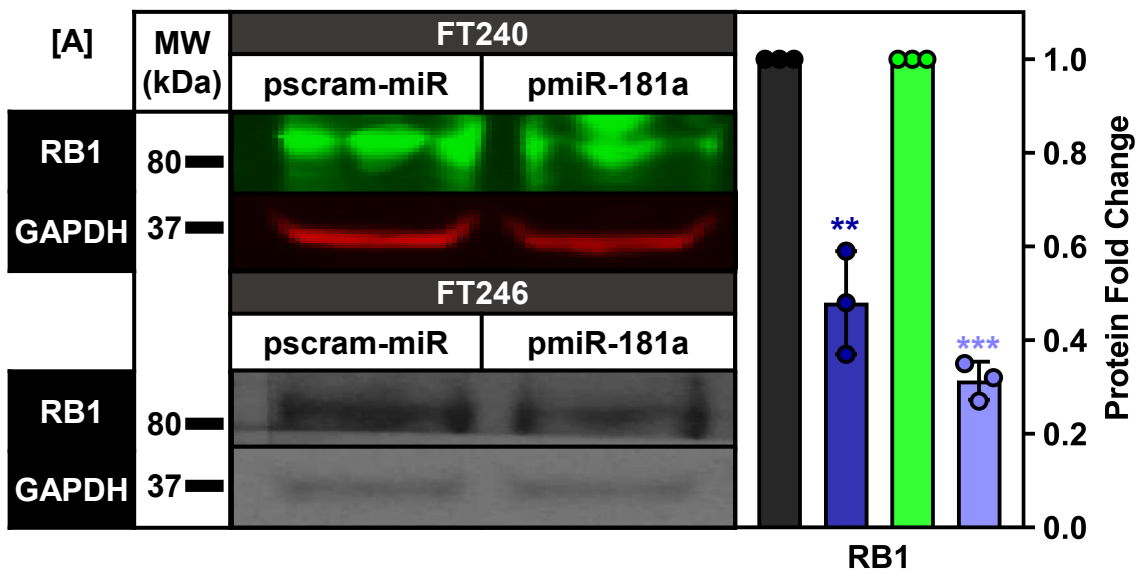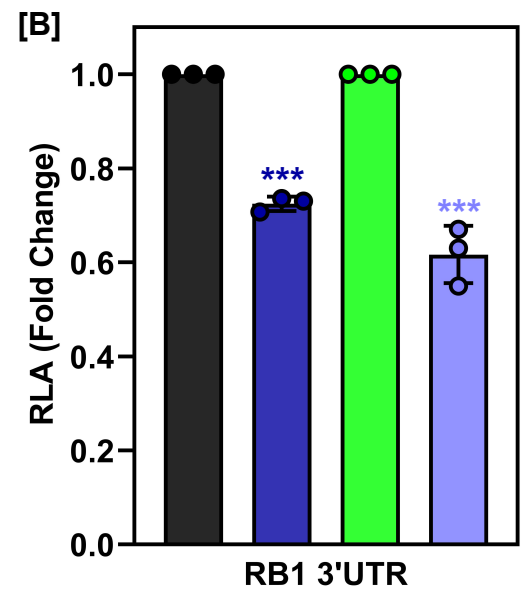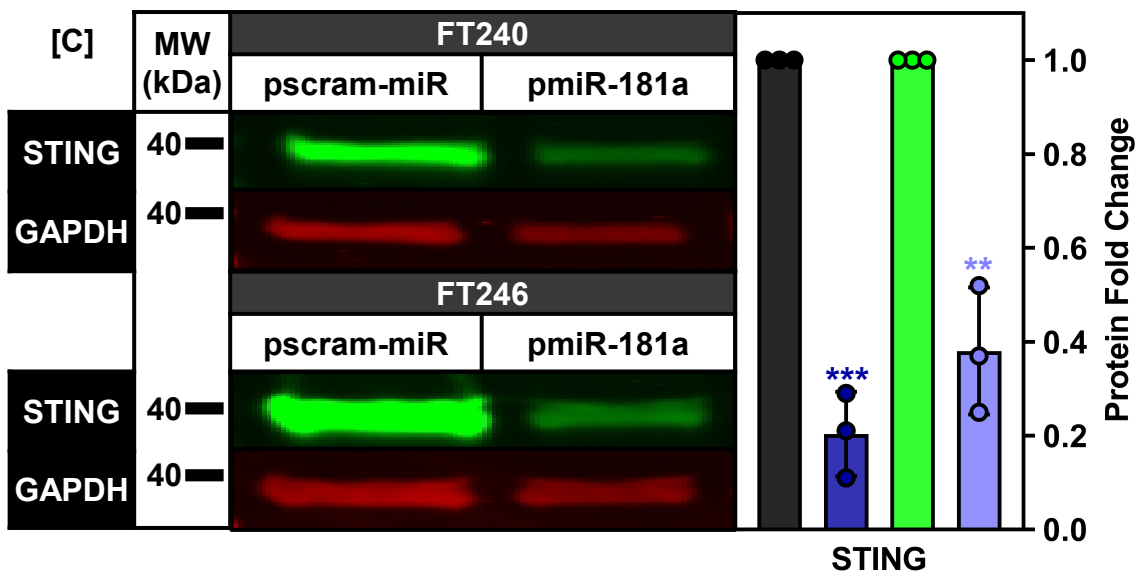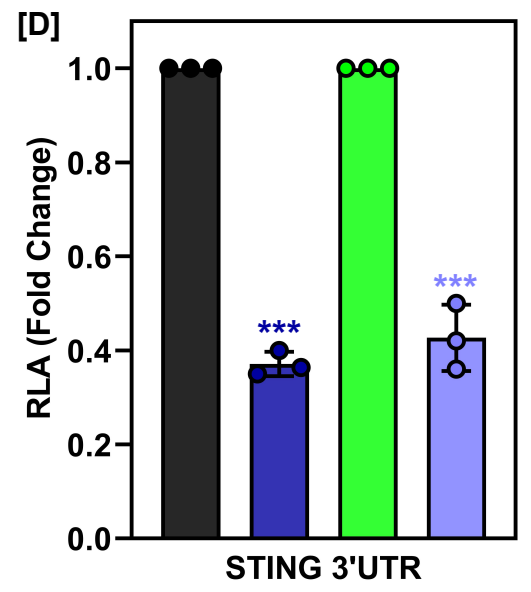

Supplementary Figure 6: miR-181a targets RB1 in FT240 and FT246 pmiR-181a cells

A) Representative western blots showing RB1 protein expression in the FT240 and FT246 pscram-miR and pmiR-181a cells. B) Quantification of RB1 protein expression in the FT240 and FT246 pscram-miR and pmiR-181a cells. C) Graph showing RB1 3'UTR relative luciferase activity for the FT240 and FT246 pscram-miR and pmiR-181a cells. D) Representative western blots showing STING protein expression in the FT240 and FT246 pscram-miR and pmiR-181a cells. E) Quantification of STING protein expression in the FT240 and FT246 pscram-miR and pmiR-181a cells. F) Graph showing STING 3'UTR relative luciferase activity for the FT240 and FT246 pscram-miR and pmiR-181a cells. All data are representative of N = 3 independent experiments unless otherwise stated. The measure of center for the error bars is given as the mean value unless otherwise stated. The statistical test used for data analysis is the two-sided Student's t-test unless otherwise stated. Error bars indicate  $\pm$ standard deviation unless otherwise stated. \* =  $p < 0.05$ , \*\* =  $p < 0.005$ , \*\*\* =  $p < 0.0005$ . Full western blots shown in Supplemental Figure 12.

Supplementary Figure 7

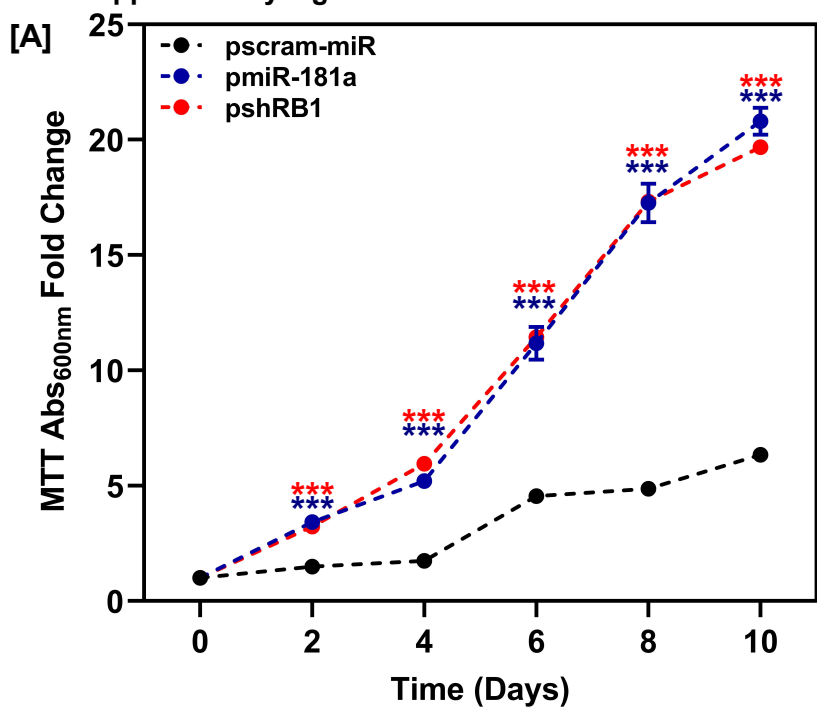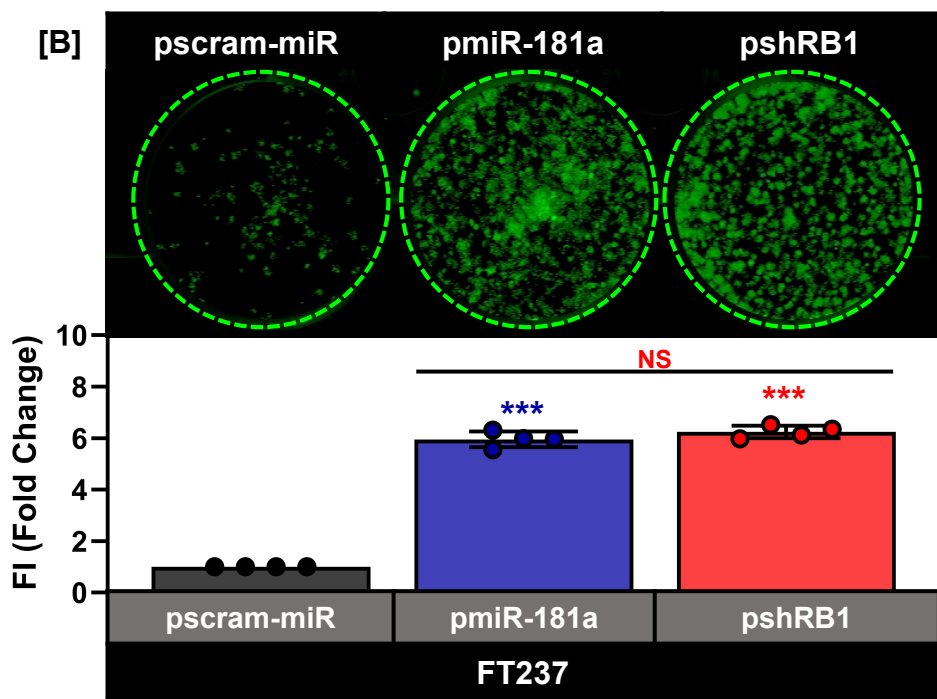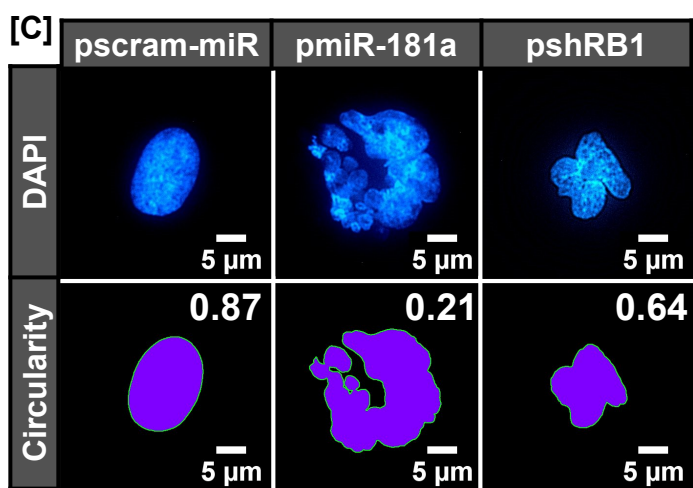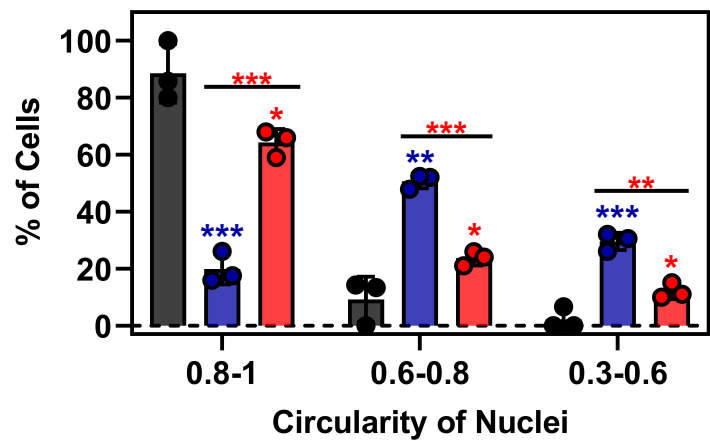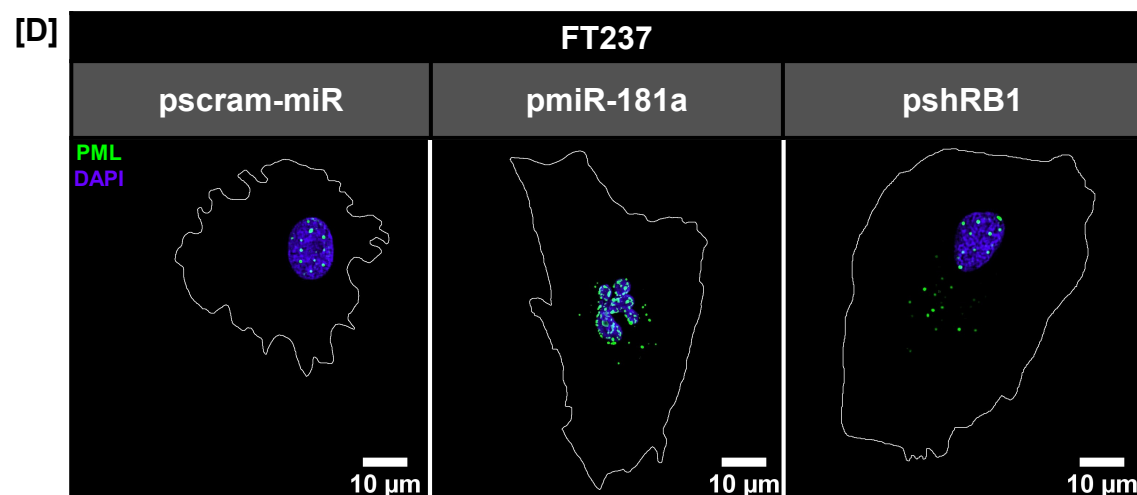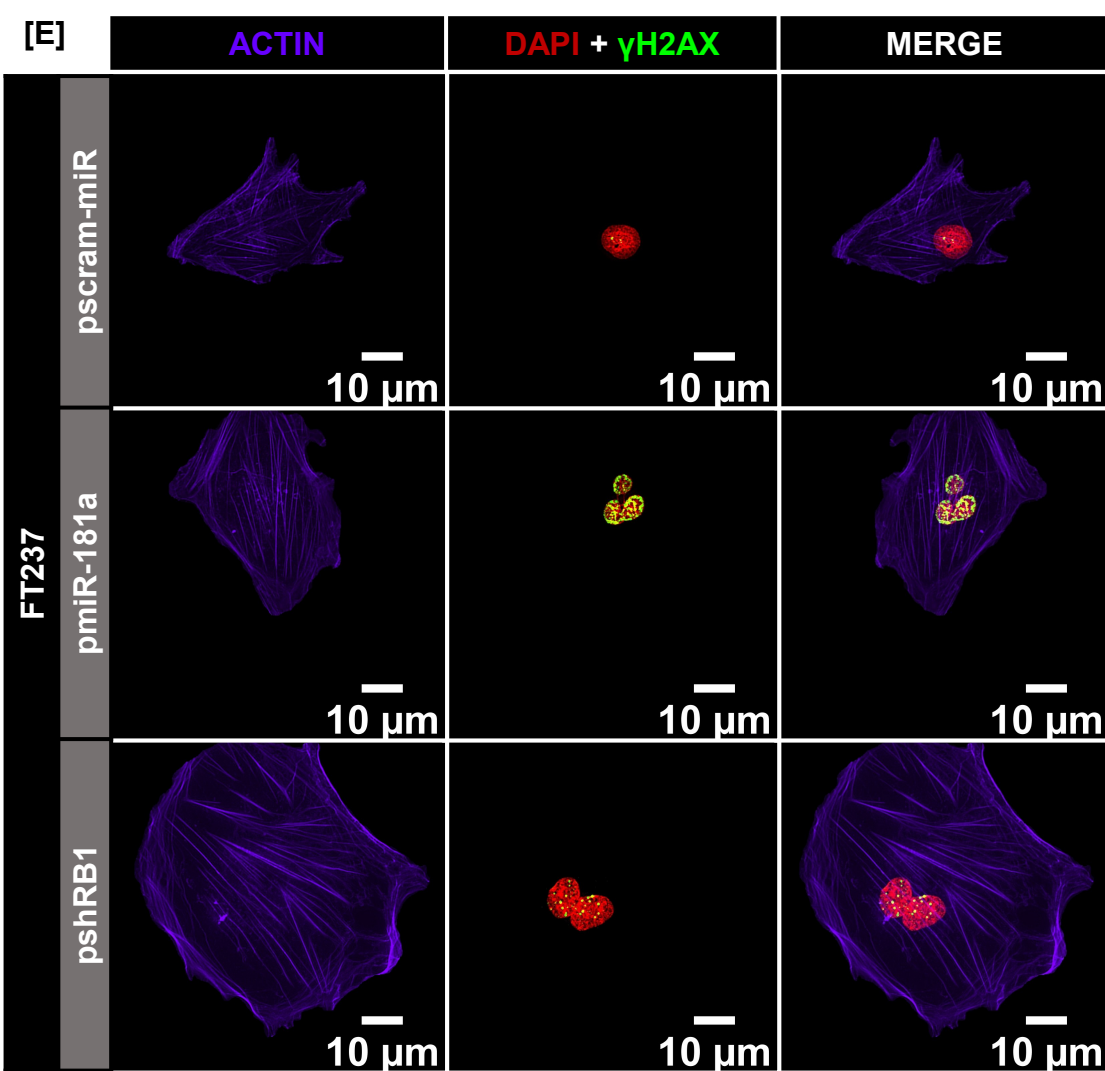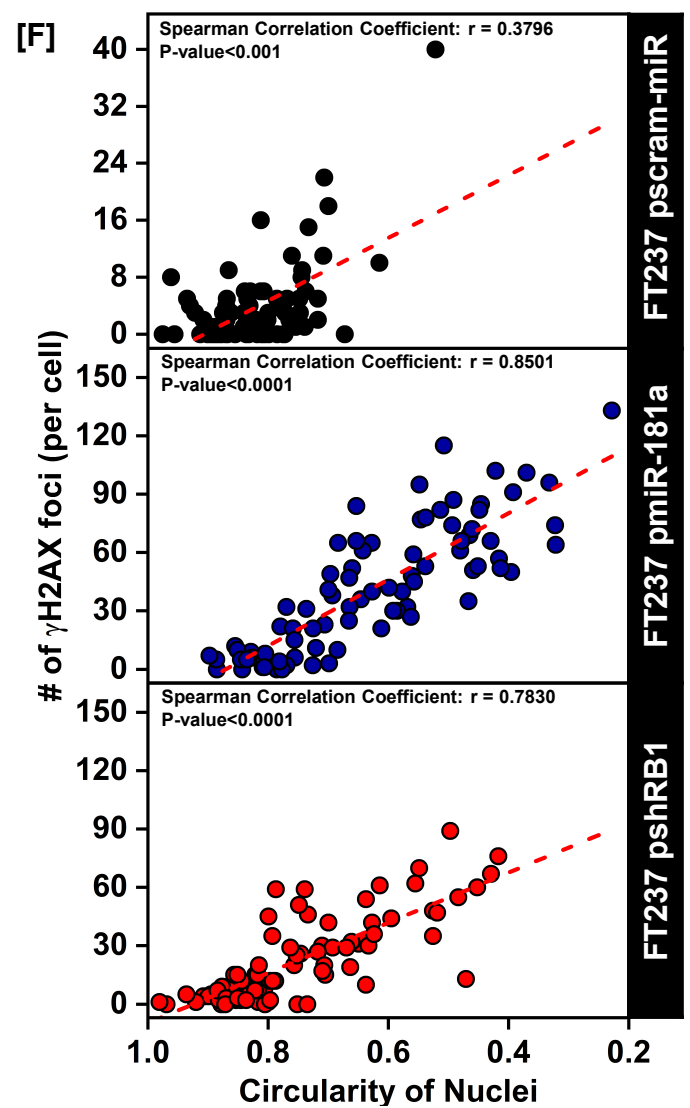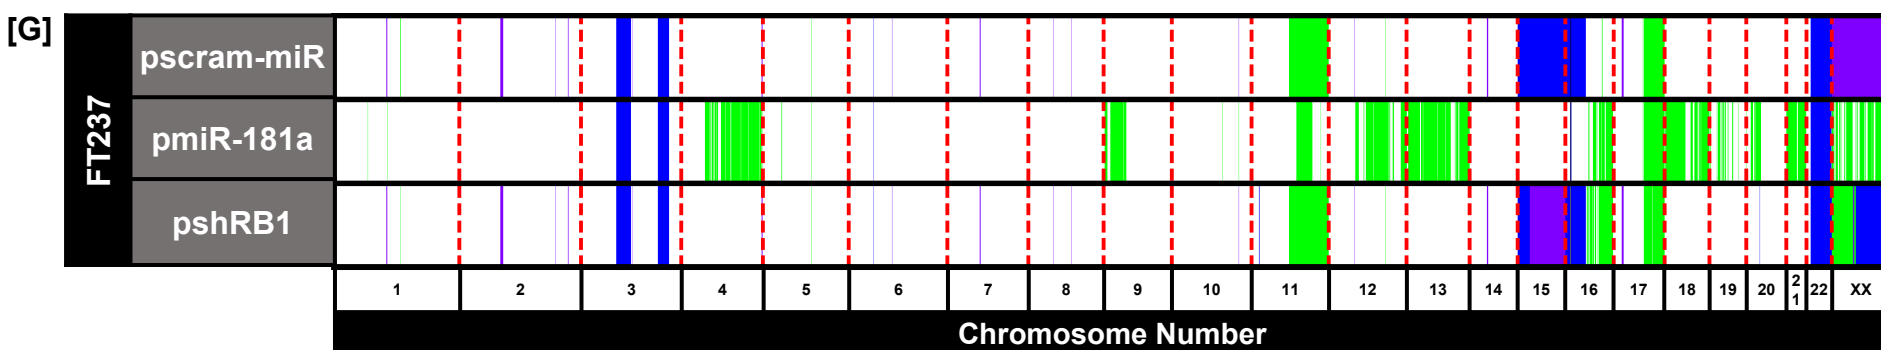

Supplementary Figure 7: Knockdown of RB1 in FTSECs phenocopies miR-181a mediated transformation

A) Graph showing increases in cell viability over a 10-day period for the FT237 pscram-miR, pmiR-181a, and pshRB1 cells. Significance values are color coded to match the pmiR-181a or pshRB1 cell line. B) Colony formation assay showing survival and colony formation for the FT237 pscram-miR, pmiR-181a, and pshRB1 cells with quantification below. Colonies were stained with CellTag 700 at 10 days. Dashed green lines denote the culture plate well boundaries. N = 4 for all cell lines. C) Immunofluorescence micrographs of representative DAPI stained nuclei (top), matched circularity masks with circularity value displayed in upper right hand corner (middle), and graph showing the circularity distribution (bottom) from FT237 pscram-miR, FT237 pmiR-181a, and FT237 pshRB1. D) Immunofluorescence micrographs of representative PML staining for the FT237 pscram-miR, pmiR-181a, and pshRB1 cells. PML bodies are stained green, DAPI stained nuclei are colored purple, and the outline of the cell is depicted in white. Quantification of the % cytoplasmic PML+ cells for each cell line is below. E) Representative immunofluorescence micrographs of  $\gamma$ H2AX staining in FT237 pscram-miR, pmiR-181a, and pshRB1 cells. Purple indicates staining of actin with Actin-Red, red indicates staining of nuclei with DAPI, green indicates staining of  $\gamma$ H2AX foci. F) Plots showing inverse correlation between the number of  $\gamma$ H2AX foci for a cell nucleus and the corresponding circularity of the same cell nucleus for FT237 pscram-miR, pmiR-181a, and pshRB1 cells. Spearman's rank order correlation analysis was used for statistical analysis. Spearman correlation coefficients and p-values are displayed for each correlation plot. G) Genomap of copy number variants detected by SNP array in FT237 pscram-miR, pmiR-181a, and pshRB1 cells. All data are representative of N = 3 independent experiments unless otherwise stated. The measure of center for the error bars is given as the mean value unless otherwise stated. The statistical test used for data analysis is the two-sided Student's t-test unless otherwise stated. Error bars indicate  $\pm$ standard deviation unless otherwise stated. \* =  $p < 0.05$ , \*\* =  $p < 0.005$ , \*\*\* =  $p < 0.0005$ .

Supplementary Figure 8

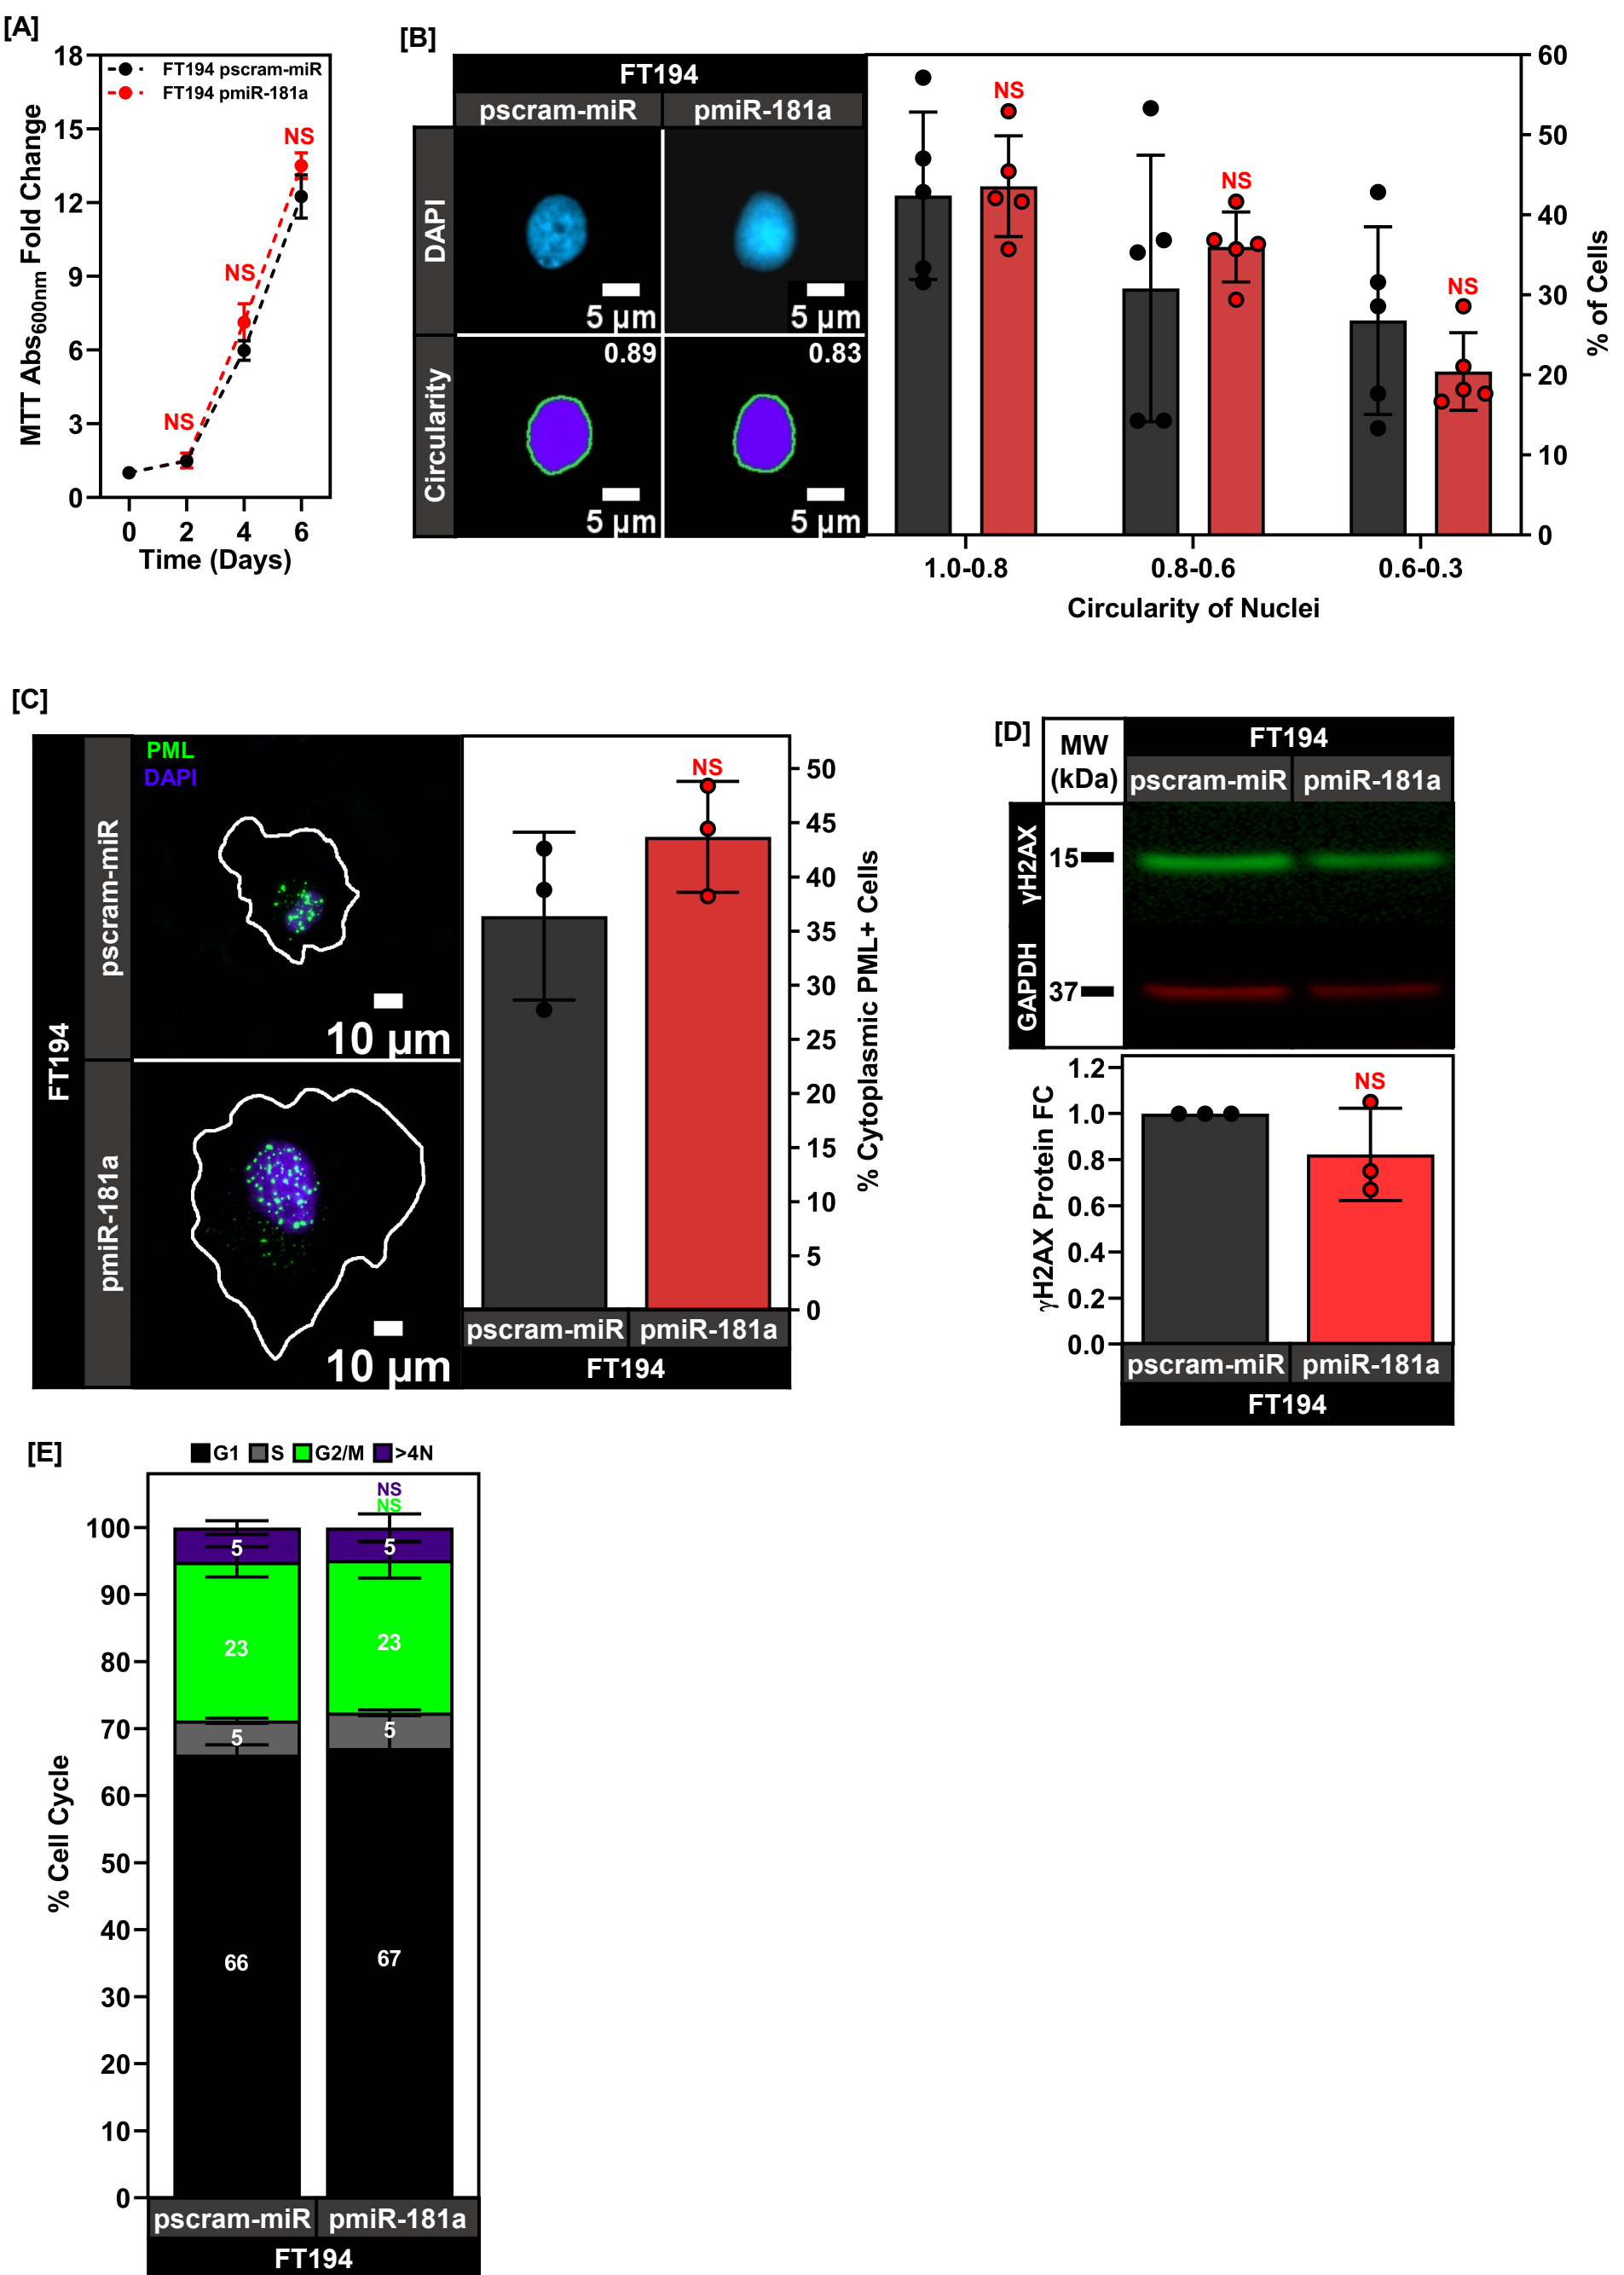



Supplementary Figure 8: SV40 large T transformed FTSECs do not display transformation phenotypes in response to miR-181a overexpression

A) Graph of cell viability growth curves for FT194 pscram-miR and pmiR-181a cells. B) Immunofluorescence micrographs of representative DAPI stained nuclei (top), matched circularity masks with circularity value displayed in upper right hand corner (bottom), and graph showing the circularity distribution (right) from FT194 pscram-miR and pmiR-181a cells. C) Immunofluorescence micrographs of representative PML staining for the FT194 pscram-miR and pmiR-181a cells. PML bodies are stained green, DAPI stained nuclei are colored purple, and the outline of the cell is depicted in white. Quantification of the % cytoplasmic PML+ cells for each cell line is below. D) Representative western blot of  $\gamma$ H2AX protein expression in FT194 pscram-miR and pmiR-181a cells with quantification below. E) Graph showing quantification of cell cycle sub-populations for FT194 pscram-miR and pmiR-181a cells. All data are representative of N = 3 independent experiments unless otherwise stated. The measure of center for the error bars is given as the mean value unless otherwise stated. The statistical test used for data analysis is the two-sided Student's t-test unless otherwise stated. Error bars indicate  $\pm$ standard deviation unless otherwise stated. \* =  $p < 0.05$ , \*\* =  $p < 0.005$ , \*\*\* =  $p < 0.0005$ . Full western blots shown in Supplemental Figure 12.

Supplementary Figure 9

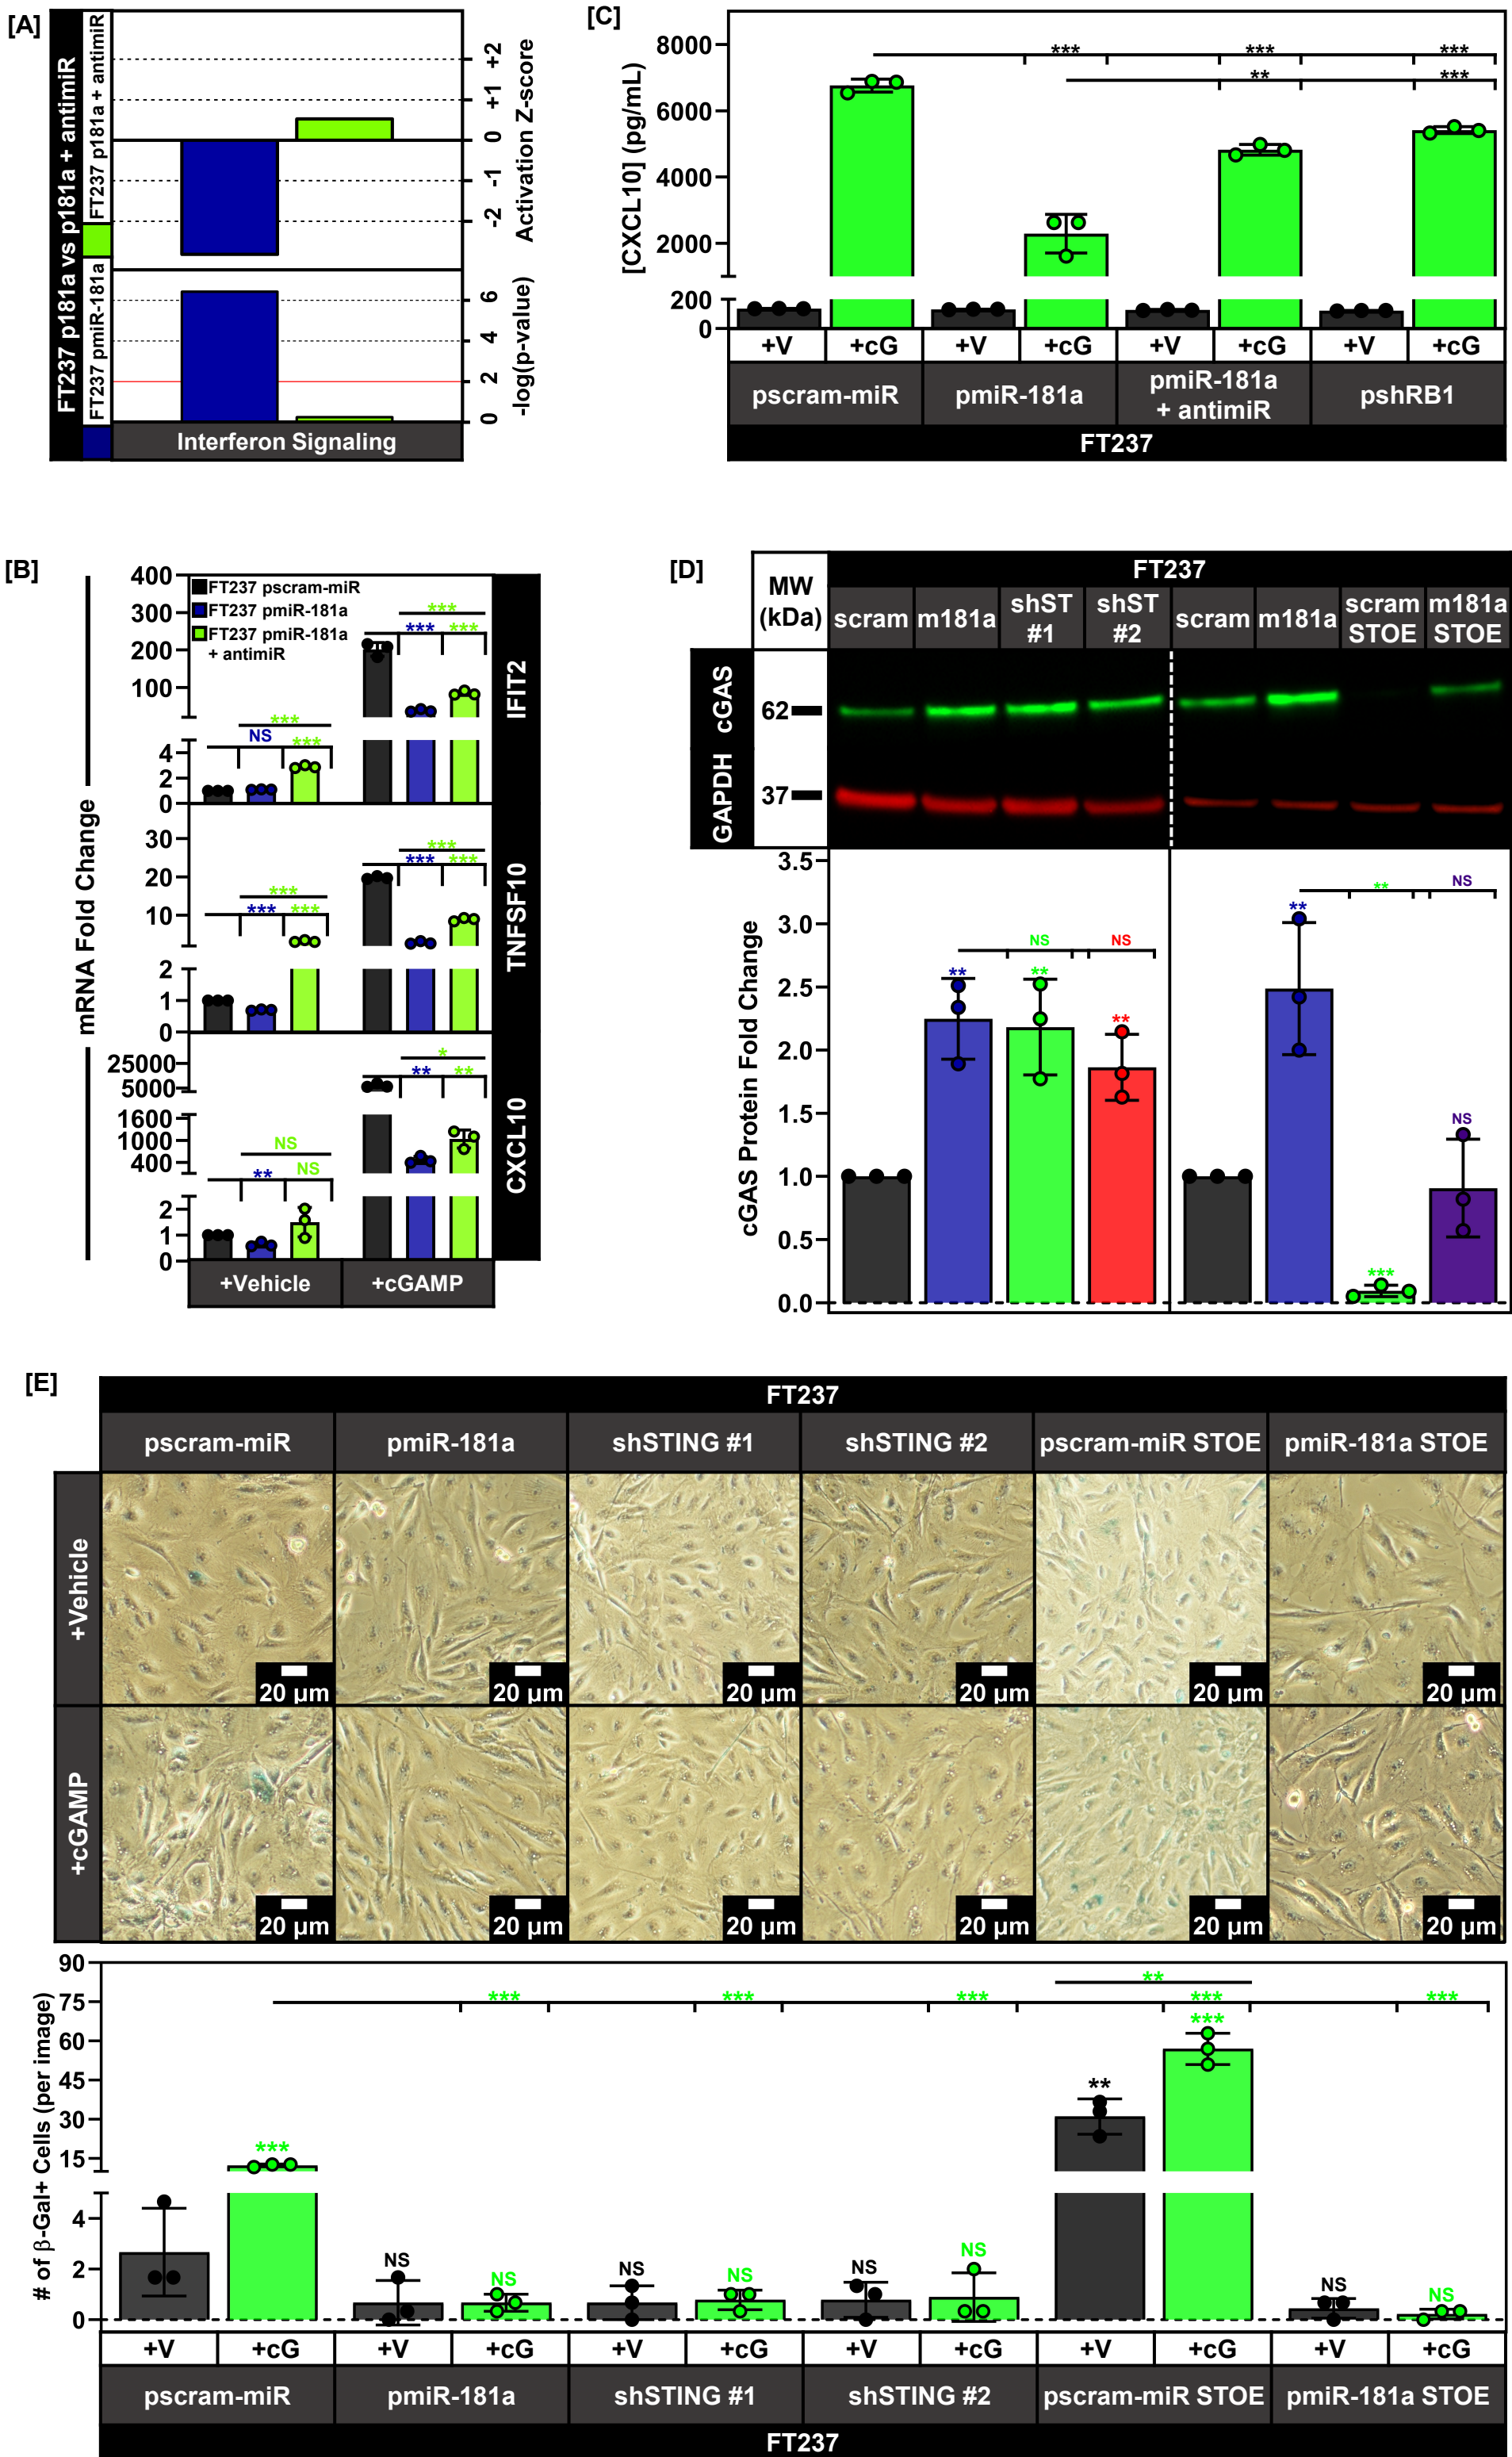

Supplementary Figure 9: miR-181a allows FTSECs to bypass GI-triggered innate immune activation by targeting the cytoplasmic DNA sensor STING

A) Graph comparing IPA Interferon Signaling in the FT237 pmiR-181a vs pmiR-181a & antimiR cells. (Bottom) graph of IPA Interferon Signaling  $-\log(p\text{-values})$  for the FT237 pmiR-181a and pmiR-181a + antimiR cells. (Top) graph of IPA Interferon Signaling Activation Z-scores for the FT237 pmiR-181a and pmiR-181a + antimiR cells. B) Graphs showing interferon inducible gene expression in FT237 pscram-miR, pmiR-181a, and pmiR-181a +antimiR cells in response to treatment with either lipofectamine vehicle or cGAMP. C) Representative western blots of cGAS expression in FT237 pscram-miR, pmiR-181a, shSTING #1, shSTING #2 pscram-miR STOE, and pmiR-181a STOE cells with quantification below. D) Bar graph showing secreted levels of CXCL10 for FT237 pscram-miR, pmiR-181a, pmiR-181a + antimiR, and pshRB1 cells 24 hours after treatment with either lipofectamine vehicle or lipofectamine + 10 ng/ $\mu\text{L}$  cGAMP. E) Representative micrographs of  $\beta$ -galactosidase staining in FT237 pscram-miR, pmiR-181a, shSTING #1, shSTING #2 pscram-miR STOE, and pmiR-181a STOE cells with quantification below. All data are representative of N = 3 independent experiments unless otherwise stated. The measure of center for the error bars is given as the mean value unless otherwise stated. The statistical test used for data analysis is the two-sided Student's t-test unless otherwise stated. Error bars indicate  $\pm$ standard deviation unless otherwise stated. \* =  $p < 0.05$ , \*\* =  $p < 0.005$ , \*\*\* =  $p < 0.0005$ . Full western blots shown in Supplemental Figure 12.

Supplementary Figure 10

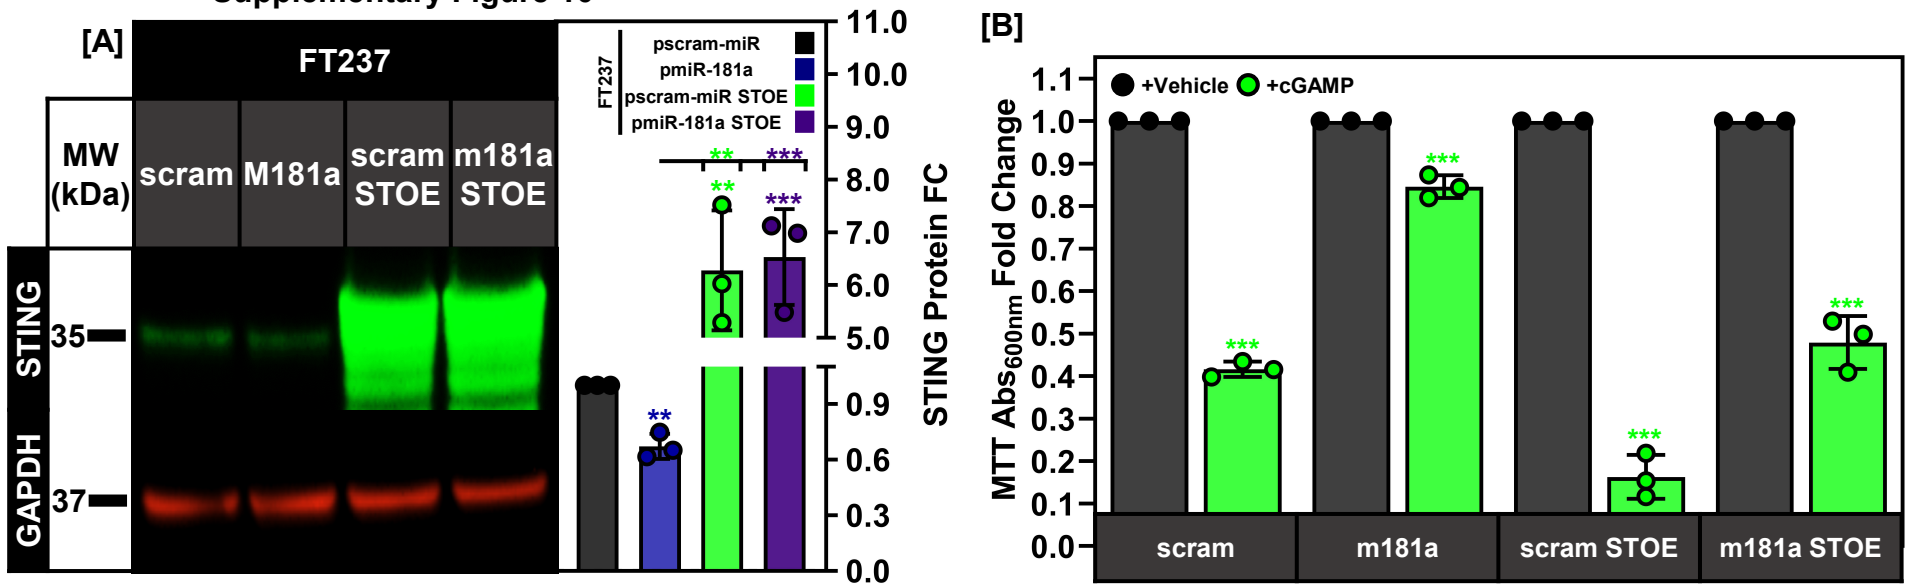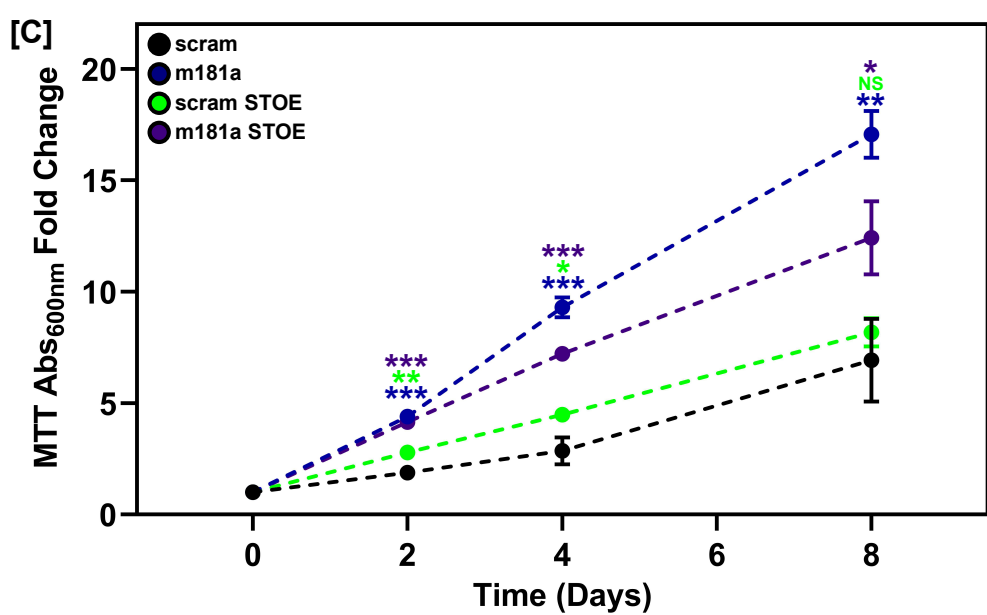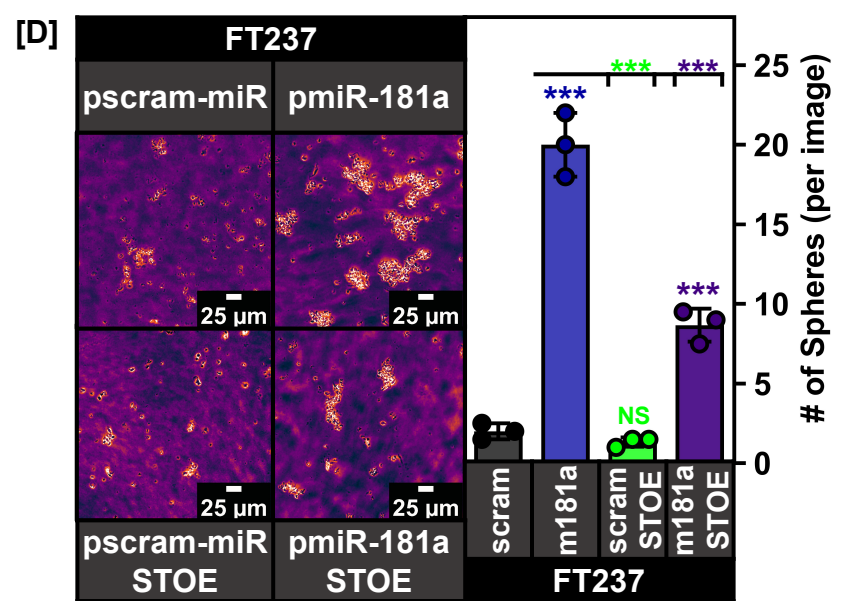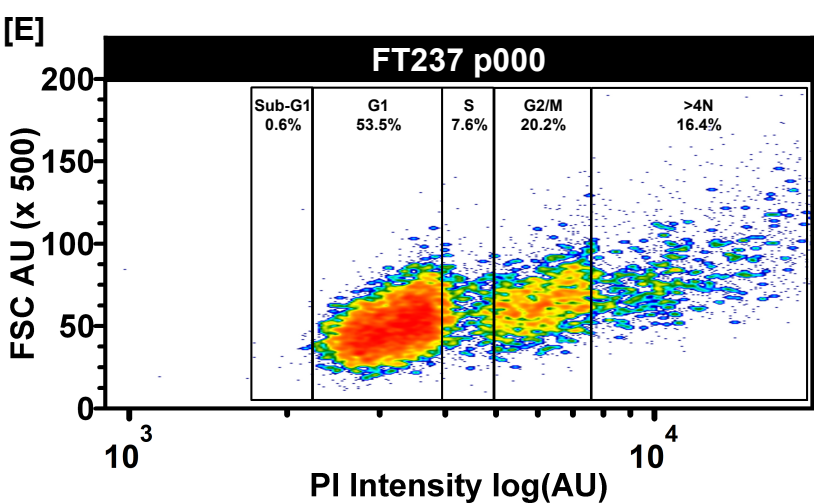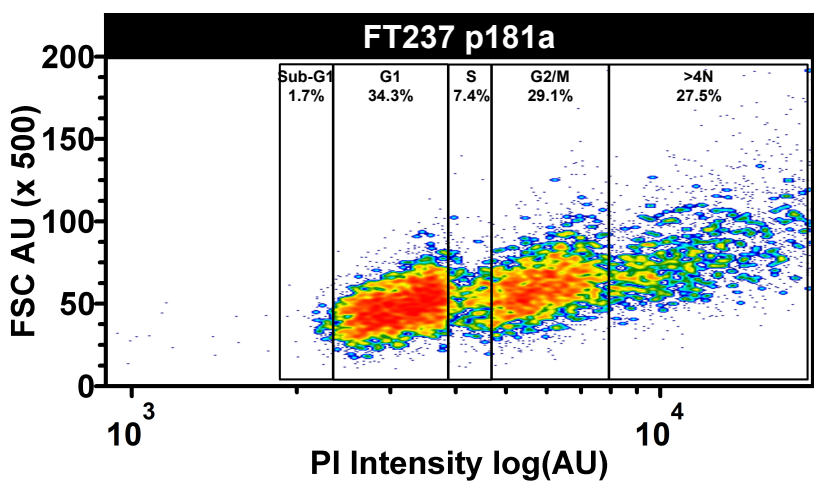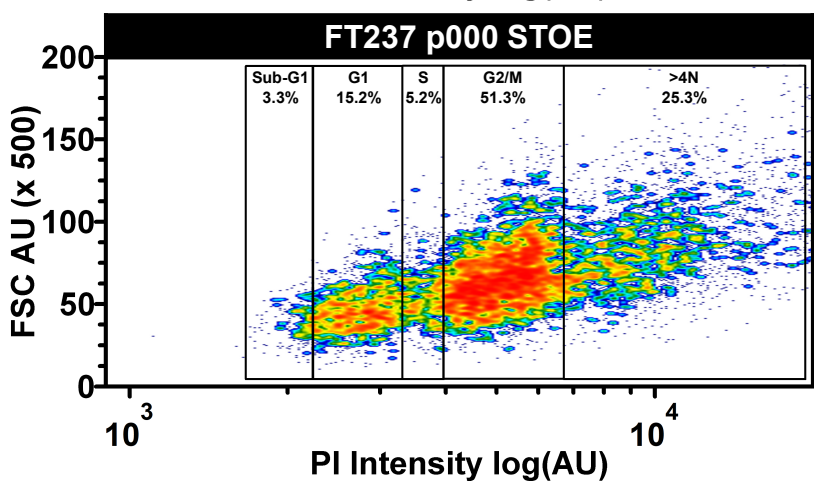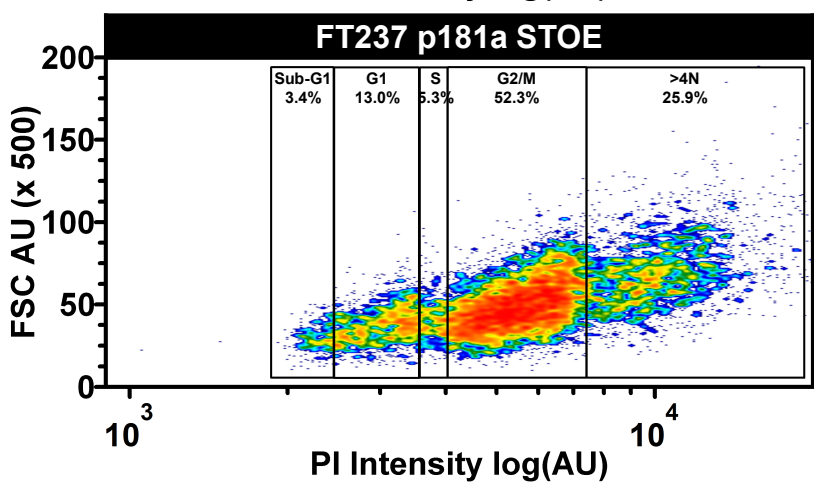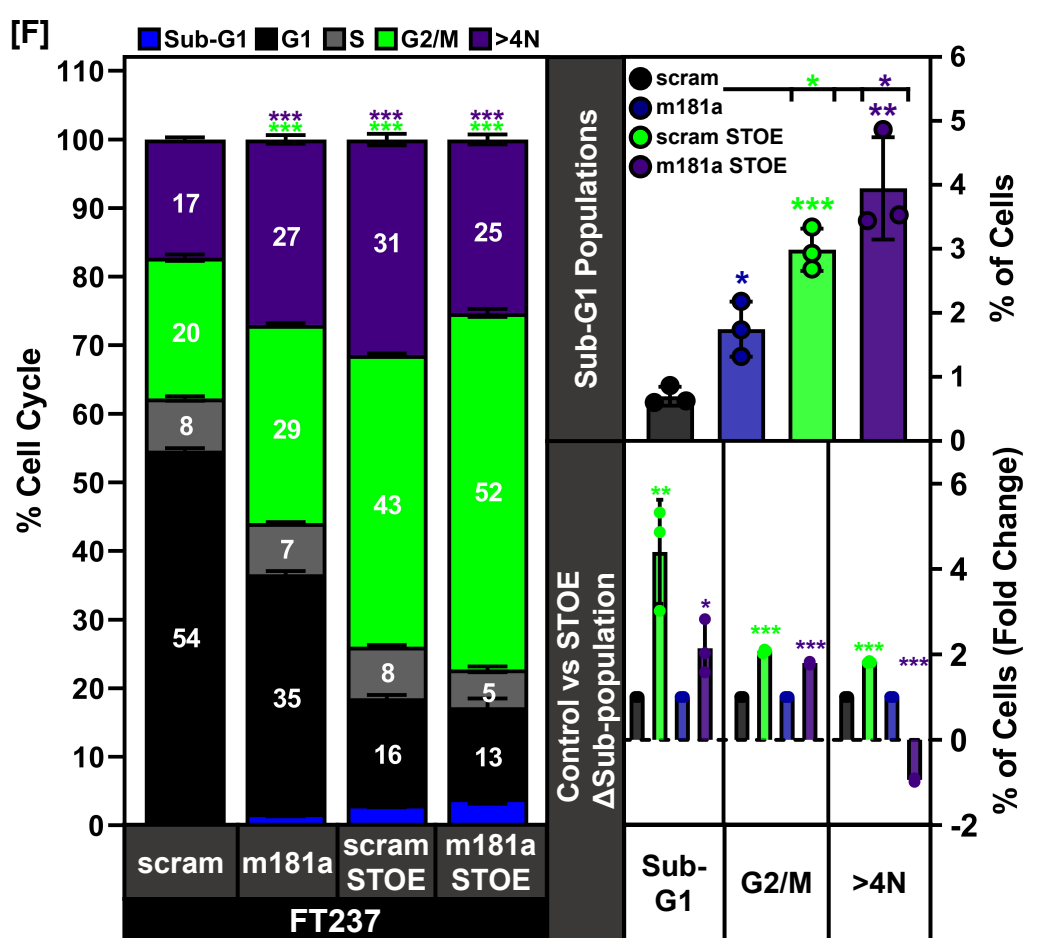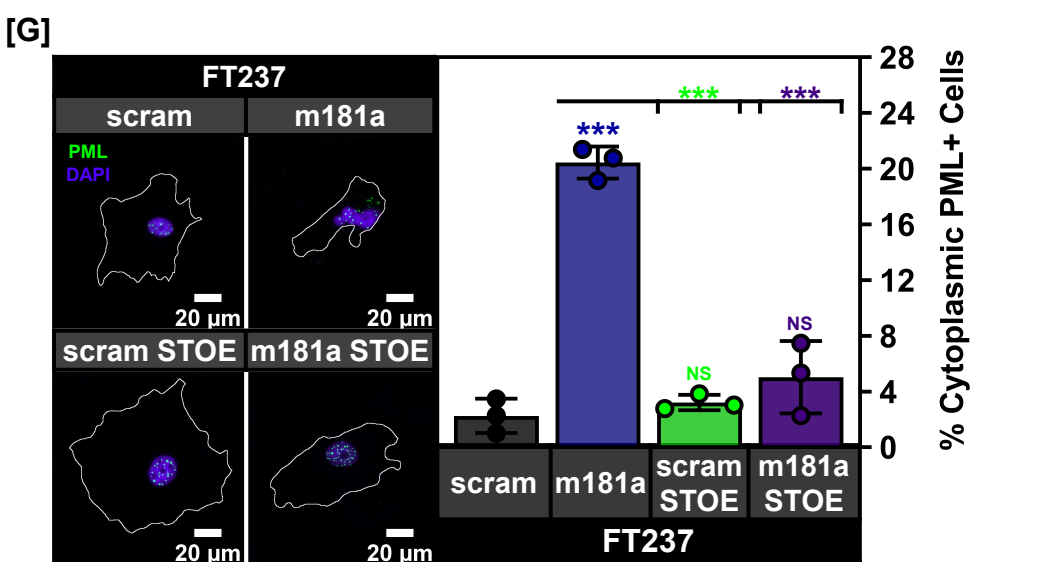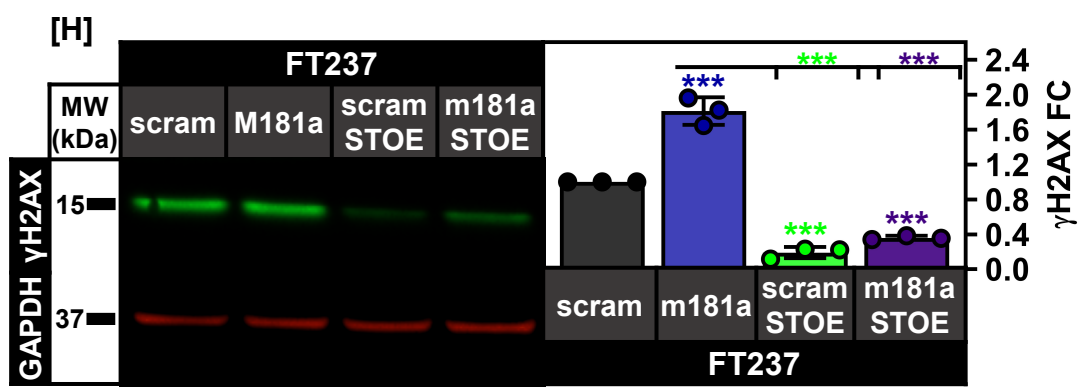

Supplementary Figure 10: Overexpression of STING inhibits miR-181a driven contributors to genomic instability and rescues activation of GI-induced interferon induced cell death

A) Representative western blot of STING protein expression in FT237 pscram-miR, pmiR-181a, pscram-miR STOE, and pmiR-181a STOE cells with quantification on the right. B) Graph of cell viability for FT237 pscram-miR, pmiR-181a, pscram-miR STOE, and pmiR-181a STOE cells 24 hours after treatment with either lipofectamine vehicle or lipofectamine + 10 ug of cGAMP. C) Graph of cell viability growth curves for FT237 pscram-miR, pmiR-181a, pscram-miR STOE, and pmiR-181a STOE cells. D) Micrographs showing anchorage independent growth of FT237 pscram-miR, pmiR-181a, pscram-miR STOE, and pmiR-181a STOE cells with quantification on the right. E) Representative graphs of cell cycle profiles for FT237 pscram-miR, pmiR-181a, pscram-miR STOE, and pmiR-181a STOE cells. F) Graphs depicting quantification of cell cycle subpopulations (left), magnified view of sub-G1 populations (top right), and change in subpopulation amount between control and STOE cells (bottom right) for FT237 pscram-miR, pmiR-181a, pscram-miR STOE, and pmiR-181a STOE cells. G) Immunofluorescence micrographs of representative PML staining for the FT237 pscram-miR, pmiR-181a, pscram-miR STOE, and pmiR-181a STOE cells. PML bodies are stained green, DAPI stained nuclei are colored purple, and the outline of the cell is depicted in white. Quantification of the % cytoplasmic PML+ cells for each cell line is located on the right. H) Representative western blot of  $\gamma$ H2AX protein levels in the FT237 pscram-miR, pmiR-181a, pscram-miR STOE, and pmiR-181a STOE cells with quantification on the right. All data are representative of N = 3 independent experiments unless otherwise stated. The measure of center for the error bars is given as the mean value unless otherwise stated. The statistical test used for data analysis is the two-sided Student's t-test unless otherwise stated. Error bars indicate  $\pm$ standard deviation unless otherwise stated. \* =  $p < 0.05$ , \*\* =  $p < 0.005$ , \*\*\* =  $p < 0.0005$ . Full western blots shown in Supplemental Figure 12.

Supplementary Figure 11

Figure 6B

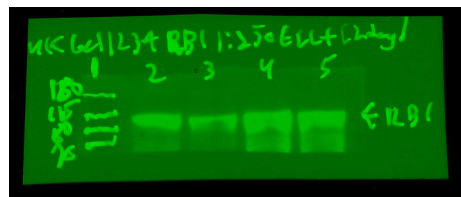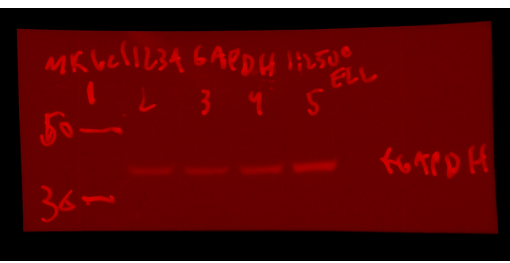

Images of film pseudocolored either green or red from original grayscale image

| Lane | Sample ID                 |
|------|---------------------------|
| 1    | Ladder                    |
| 2    | FT237 pscram-miR          |
| 3    | FT237 pmiR-181a           |
| 4    | FT237 pmiR-181a + antimiR |
| 5    | FT237 pmiR-181a + pMYC    |

Figure 7A

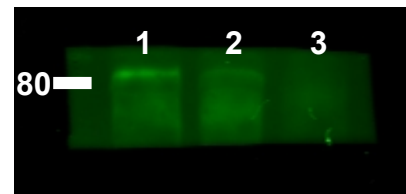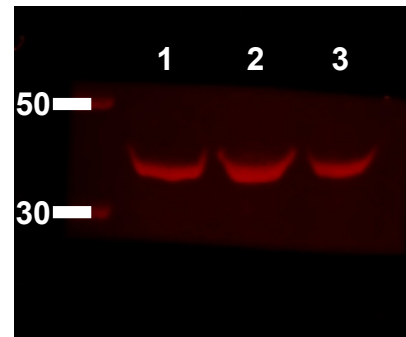

| Lane | Sample ID        |
|------|------------------|
| 1    | FT237 pscram-miR |
| 2    | FT237 pmiR-181a  |
| 3    | FT237 pshRB1     |

Figure 8B

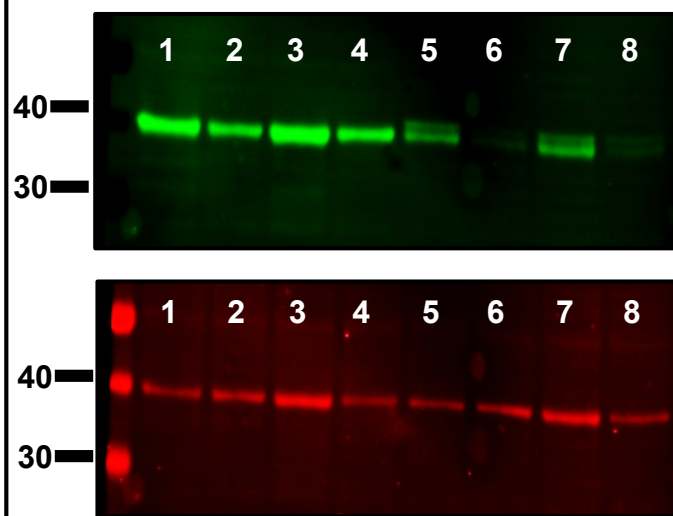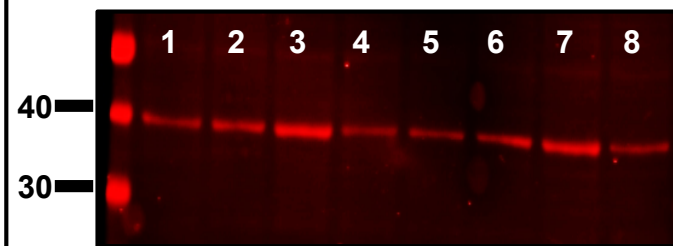

| Lane | Sample ID                            |
|------|--------------------------------------|
| 1    | FT237 pscram-miR (+cGAMP)            |
| 2    | FT237 pmiR-181a (+cGAMP)             |
| 3    | FT237 pmiR-181a + antimiR (+cGAMP)   |
| 4    | FT237 pshRB1 (+cGAMP)                |
| 5    | FT237 pscram-miR (+vehicle)          |
| 6    | FT237 pmiR-181a (+vehicle)           |
| 7    | FT237 pmiR-181a + antimiR (+vehicle) |
| 8    | FT237 pshRB1 (+vehicle)              |

STING 1° Ab is Rabbit. GAPDH 1° Ab is mouse. LICOR Anti-Rabbit IRDye 800 2° Ab used to detect STING. LICOR Anti-Mouse IRDye 680 2° Ab used to detect GAPDH.

Figure 9A

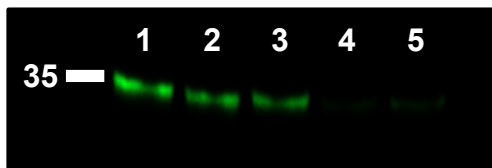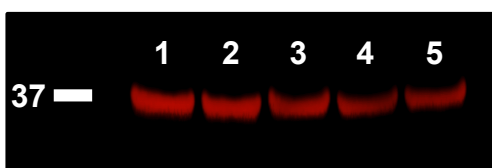

| Lane | Sample ID        |
|------|------------------|
| 1    | FT237 pscram-miR |
| 2    | FT237 pmiR-181a  |
| 3    | FT237 shSTING #1 |
| 4    | FT237 shSTING #2 |
| 5    | FT237 shSTING #3 |

STING 1° Ab is Rabbit. GAPDH 1° Ab is mouse. LICOR Anti-Rabbit IRDye 800 2° Ab used to detect STING. LICOR Anti-Mouse IRDye 680 2° Ab used to detect GAPDH.

Figure 9I

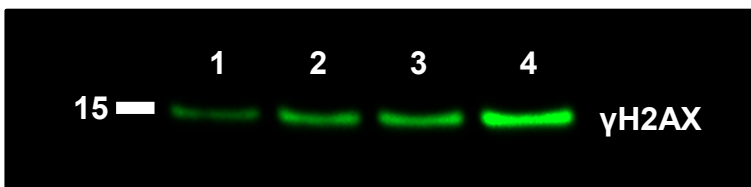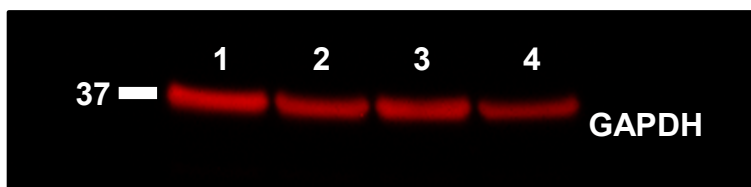

| Lane | Sample ID        |
|------|------------------|
| 1    | FT237 pscram-miR |
| 2    | FT237 pmiR-181a  |
| 3    | FT237 shSTING #1 |
| 4    | FT237 shSTING #2 |

Supplementary Figure 11  
Full western blot images for  
Figures 6-9.

# Supplementary Figure 12

## Supplemental Figure 6A

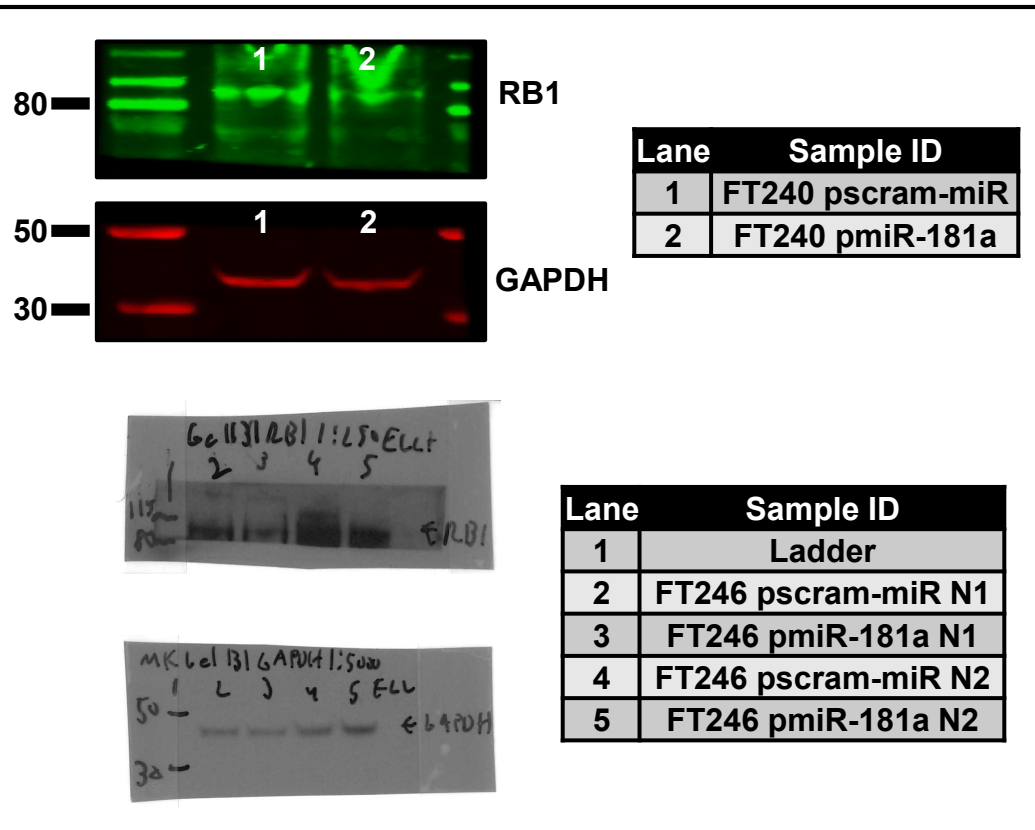

## Supplemental Figure 6C

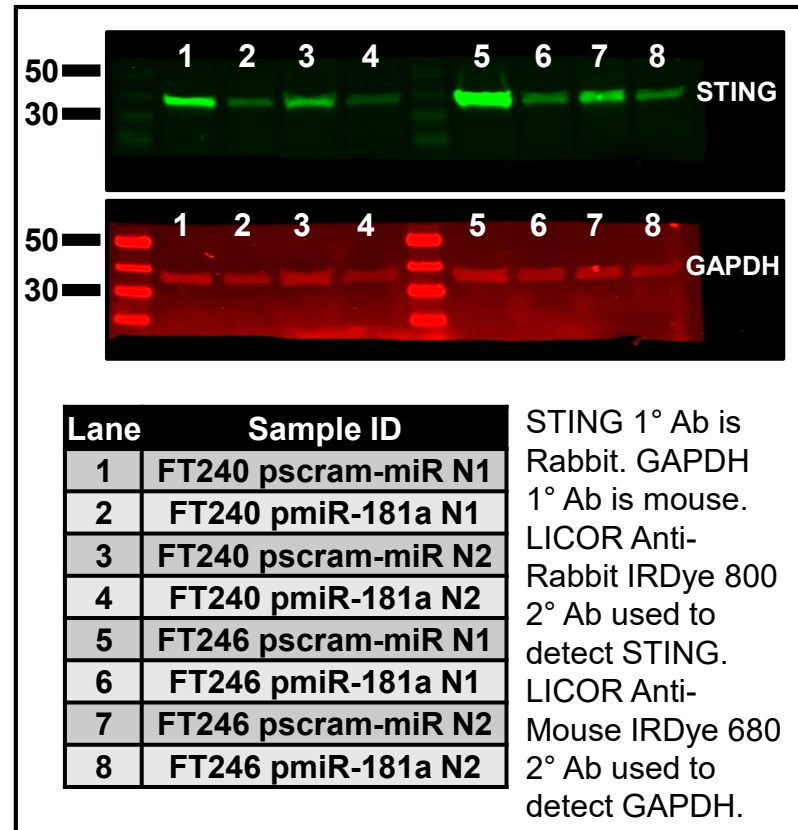

## Supplemental Figure 8D

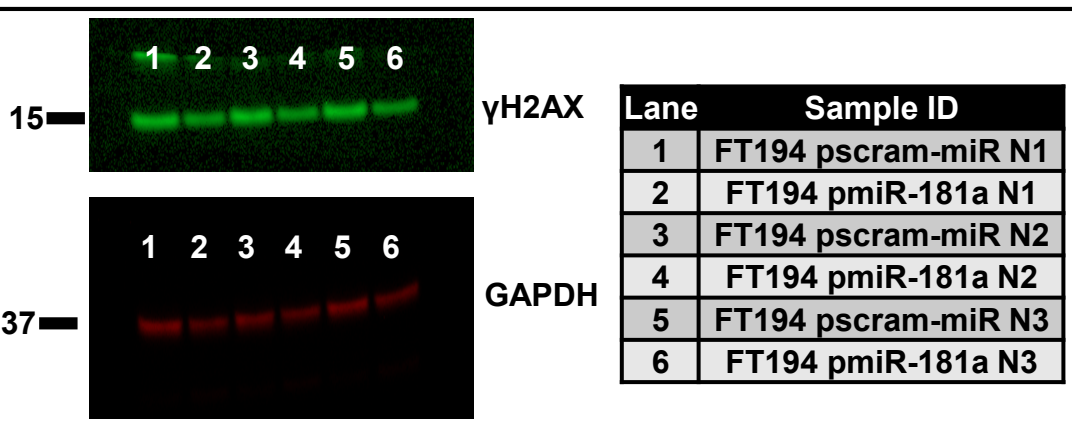

## Supplemental Figure 10A

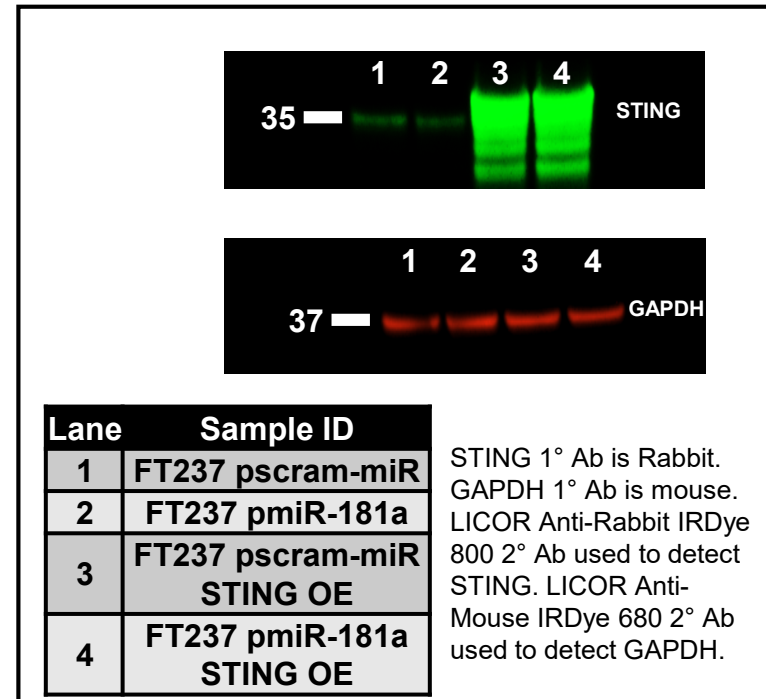

## Supplemental Figure 9D

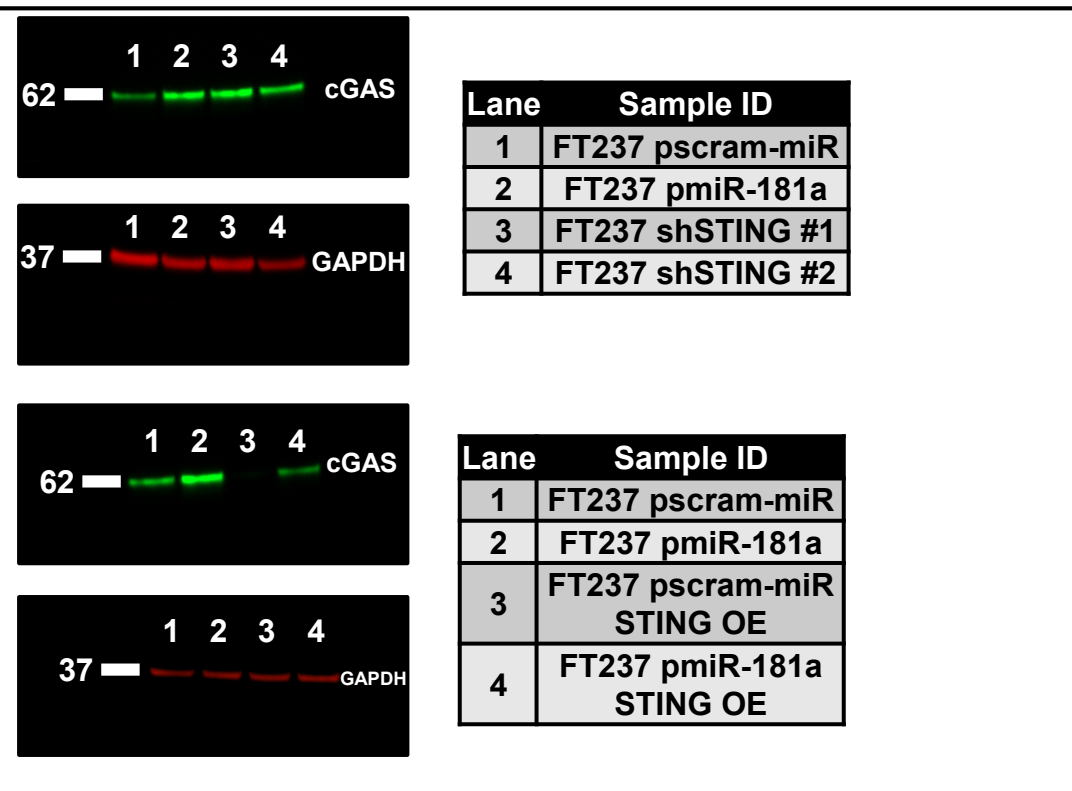

## Supplemental Figure 10H

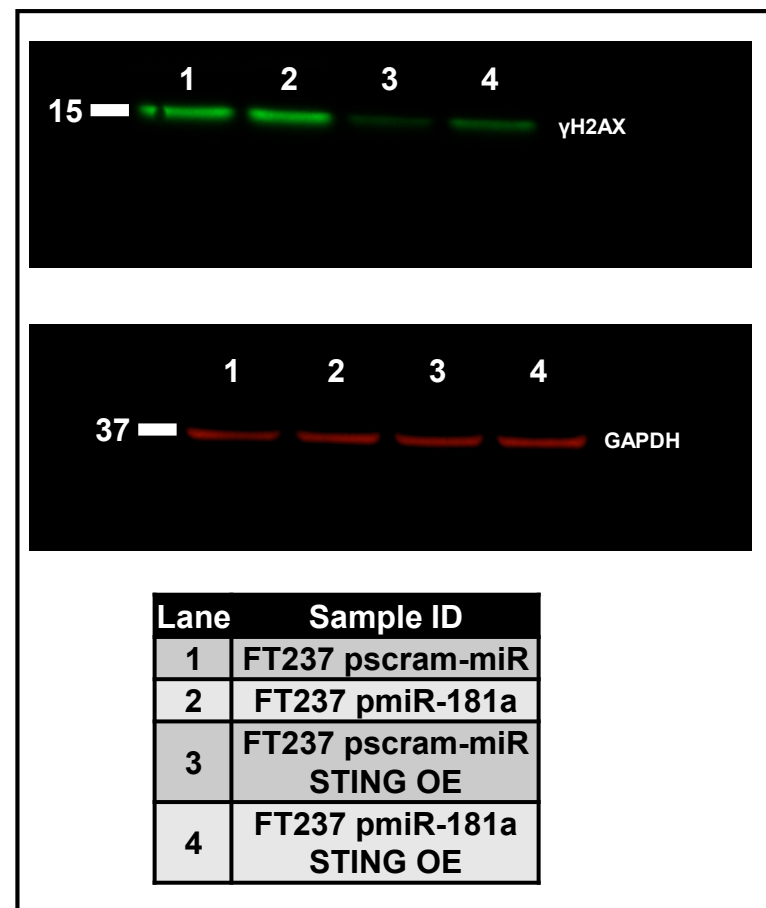

Supplementary Figure 12  
Full western blot images for Supplemental Figures 6, 8, 9, and 10

**Supplemental Table 1: List of Primers Used**

|                   |                           |
|-------------------|---------------------------|
| <b>18S RP</b>     | GGAAAGCAGACATTGACCTCAC    |
| <b>18S LP</b>     | CCATCCTTTACATCCTTCTGTCTGT |
| <b>RB1 RP</b>     | GTTGGTCCTTCTCGGTCTT       |
| <b>RB1 LP</b>     | CAAAGCAGAAGGCAACTTGA      |
| <b>STING FP</b>   | CACTTGGATGCTTGCCCTC       |
| <b>STING RP</b>   | GCCACGTTGAAATTCCTTTTT     |
| <b>IFIT2 FP</b>   | AAGCACCTCAAAGGGCAAAC      |
| <b>IFIT2 RP</b>   | TCGGCCCATGTGATAGTAGAC     |
| <b>CXCL10 FP</b>  | GTGGCATTCAAGGAGTACCTC     |
| <b>CXCL10 RP</b>  | TGATGGCCTTCGATTCTGGATT    |
| <b>TNFSF10 FP</b> | TGCGTGCTGATCGTGATCTTC     |
| <b>TNFSF10 RP</b> | GCTCGTTGGTAAAGTACACGTA    |

**Supplemental Table 2: List of Antibodies Used**

| <b>Primary Antibody</b>                  | <b>Company</b>            | <b>Catalog #</b> | <b>Dilution</b> |
|------------------------------------------|---------------------------|------------------|-----------------|
| <b>RB1</b>                               | Cell Signaling Technology | 9313             | 1:500           |
| <b>GAPDH</b>                             | Santa Cruz                | sc-365062        | 1:2500          |
| <b>STING</b>                             | Cell Signaling Technology | 13647S           | 1:500           |
| <b>IFIT2</b>                             | Santa Cruz                | Sc-390724        | 1:250           |
| <b>TNFSF10</b>                           | Cell Signaling Technology | 3219S            | 1:500           |
| <b>CXCL10</b>                            | Abcam                     | Ab8098           | 1:500           |
| <b>Secondary Antibody</b>                | <b>Company</b>            | <b>Catalog #</b> | <b>Dilution</b> |
| <b>IRDye® 800CW Goat anti-Rabbit IgG</b> | LICOR                     | 925-32211        | 1:2500          |
| <b>IRDye® 680LT Goat anti-Rabbit IgG</b> | LICOR                     | 925-68021        | 1:2500          |
| <b>IRDye® 800CW Goat anti-Mouse IgG</b>  | LICOR                     | 925-32210        | 1:2500          |
| <b>IRDye® 680LT Goat anti-Mouse IgG</b>  | LICOR                     | 925-68020        | 1:2500          |

**Supplemental Table 3: Figure 1 Statistical Tests**

| <b>Figure Panel</b> | <b>Groups Compared</b>             | <b>Statistical Test Used</b> | <b>P value</b> | <b>P value summary</b> | <b>Significantly different (P &lt; 0.05)?</b> | <b>One- or two-tailed P value?</b> | <b>t, df</b>  | <b>Difference of Means 95% Confidence Interval</b> |
|---------------------|------------------------------------|------------------------------|----------------|------------------------|-----------------------------------------------|------------------------------------|---------------|----------------------------------------------------|
| 1B                  | FT237 pscram-miR vs pmiR-181a      | Unpaired t test              | 0.0006         | ***                    | Yes                                           | Two-tailed                         | t=9.950, df=4 | 27.76 to 49.24                                     |
| 1B                  | FT240 pscram-miR vs pmiR-181a      | Unpaired t test              | 0.0027         | **                     | Yes                                           | Two-tailed                         | t=6.601, df=4 | 12.65 to 31.02                                     |
| 1B                  | FT246 pscram-miR vs pmiR-181a      | Unpaired t test              | 0.0012         | **                     | Yes                                           | Two-tailed                         | t=8.299, df=4 | 19.72 to 39.55                                     |
| 1C                  | FT237 pscram-miR vs pmiR-181a D2   | Unpaired t test              | 0.025          | *                      | Yes                                           | Two-tailed                         | t=3.496, df=4 | 0.04744 to 0.4136                                  |
| 1C                  | FT237 pscram-miR vs pmiR-181a D4   | Unpaired t test              | 0.0002         | ***                    | Yes                                           | Two-tailed                         | t=12.97, df=4 | 1.328 to 2.051                                     |
| 1C                  | FT237 pscram-miR vs pmiR-181a D6   | Unpaired t test              | <0.0001        | ****                   | Yes                                           | Two-tailed                         | t=17.48, df=4 | 3.990 to 5.496                                     |
| 1C                  | FT237 pscram-miR vs pmiR-181a D8   | Unpaired t test              | <0.0001        | ****                   | Yes                                           | Two-tailed                         | t=16.55, df=4 | 6.081 to 8.532                                     |
| 1C                  | FT237 pscram-miR vs pmiR-181a D10  | Unpaired t test              | 0.0003         | ***                    | Yes                                           | Two-tailed                         | t=12.30, df=4 | 7.804 to 12.35                                     |
| 1C                  | FT240 pscram-miR vs pmiR-181a D2   | Unpaired t test              | <0.0001        | ****                   | Yes                                           | Two-tailed                         | t=20.96, df=4 | 1.323 to 1.727                                     |
| 1C                  | FT240 pscram-miR vs pmiR-181a D4   | Unpaired t test              | <0.0001        | ****                   | Yes                                           | Two-tailed                         | t=24.45, df=4 | 6.341 to 7.965                                     |
| 1C                  | FT240 pscram-miR vs pmiR-181a D6   | Unpaired t test              | <0.0001        | ****                   | Yes                                           | Two-tailed                         | t=27.32, df=4 | 8.236 to 10.10                                     |
| 1C                  | FT240 pscram-miR vs pmiR-181a D8   | Unpaired t test              | <0.0001        | ****                   | Yes                                           | Two-tailed                         | t=22.39, df=4 | 13.96 to 17.91                                     |
| 1C                  | FT240 pscram-miR vs pmiR-181a D10  | Unpaired t test              | <0.0001        | ****                   | Yes                                           | Two-tailed                         | t=22.31, df=4 | 14.49 to 18.61                                     |
| 1C                  | FT246 pscram-miR vs pmiR-181a D2   | Unpaired t test              | <0.0001        | ****                   | Yes                                           | Two-tailed                         | t=32.06, df=4 | 1.565 to 1.862                                     |
| 1C                  | FT246 pscram-miR vs pmiR-181a D4   | Unpaired t test              | <0.0001        | ****                   | Yes                                           | Two-tailed                         | t=17.72, df=4 | 5.332 to 7.313                                     |
| 1C                  | FT246 pscram-miR vs pmiR-181a D6   | Unpaired t test              | 0.0002         | ***                    | Yes                                           | Two-tailed                         | t=12.66, df=4 | 4.221 to 6.592                                     |
| 1C                  | FT246 pscram-miR vs pmiR-181a D8   | Unpaired t test              | 0.0005         | ***                    | Yes                                           | Two-tailed                         | t=10.33, df=4 | 6.215 to 10.78                                     |
| 1C                  | FT246 pscram-miR vs pmiR-181a D10  | Unpaired t test              | 0.0002         | ***                    | Yes                                           | Two-tailed                         | t=12.53, df=4 | 7.052 to 11.07                                     |
| 1D                  | FT237 pscram-miR vs pmiR-181a      | Unpaired t test              | 0.0002         | ***                    | Yes                                           | Two-tailed                         | t=12.40, df=4 | 4.494 to 7.086                                     |
| 1D                  | FT240 pscram-miR vs pmiR-181a      | Unpaired t test              | <0.0001        | ****                   | Yes                                           | Two-tailed                         | t=17.73, df=4 | 1.521 to 2.086                                     |
| 1D                  | FT246 pscram-miR vs pmiR-181a      | Unpaired t test              | 0.0055         | **                     | Yes                                           | Two-tailed                         | t=5.448, df=4 | 5.476 to 16.86                                     |
| 1E                  | FT237 pscram-miR vs pmiR-181a      | Unpaired t test              | <0.0001        | ****                   | Yes                                           | Two-tailed                         | t=9.858, df=8 | 14.25 to 22.95                                     |
| 1E                  | FT240 pscram-miR vs pmiR-181a      | Unpaired t test              | <0.0001        | ****                   | Yes                                           | Two-tailed                         | t=18.23, df=8 | 32.01 to 41.29                                     |
| 1E                  | FT246 pscram-miR vs pmiR-181a      | Unpaired t test              | <0.0001        | ****                   | Yes                                           | Two-tailed                         | t=8.285, df=8 | 16.31 to 28.89                                     |
| 1F                  | FT237 pscram-miR vs pmiR-181a G2/M | Unpaired t test              | <0.0001        | ****                   | Yes                                           | Two-tailed                         | t=16.82, df=4 | 12.87 to 17.96                                     |
| 1F                  | FT240 pscram-miR vs pmiR-181a G2/M | Unpaired t test              | 0.0004         | ***                    | Yes                                           | Two-tailed                         | t=10.63, df=4 | 8.286 to 14.14                                     |
| 1F                  | FT246 pscram-miR vs pmiR-181a G2/M | Unpaired t test              | 0.0412         | *                      | Yes                                           | Two-tailed                         | t=2.967, df=4 | 0.3338 to 10.03                                    |
| 1F                  | FT237 pscram-miR vs pmiR-181a >4N  | Unpaired t test              | 0.0007         | ***                    | Yes                                           | Two-tailed                         | t=9.353, df=4 | 4.217 to 7.778                                     |
| 1F                  | FT240 pscram-miR vs pmiR-181a >4N  | Unpaired t test              | 0.0053         | **                     | Yes                                           | Two-tailed                         | t=5.498, df=4 | 1.928 to 5.863                                     |
| 1F                  | FT246 pscram-miR vs pmiR-181a >4N  | Unpaired t test              | 0.001          | **                     | Yes                                           | Two-tailed                         | t=8.584, df=4 | 4.564 to 8.927                                     |



**Supplemental Table 4: Figure 2 Statistical Tests**

| Figure Panel | Groups Compared                     | Statistical Test Used | P value        | P value summary               | Significantly different (P < 0.05)? | One- or two-tailed P value?         |                             |                                       |                |
|--------------|-------------------------------------|-----------------------|----------------|-------------------------------|-------------------------------------|-------------------------------------|-----------------------------|---------------------------------------|----------------|
| 2B           | FT237 pscram-miR vs pmiR-181a       | Fisher's exact test   | 0.0001         | ***                           | Yes                                 | Two-sided                           |                             |                                       |                |
| 2B           | FT237 pscram-miR vs antimir         | Fisher's exact test   | >0.9999        | ns                            | No                                  | Two-sided                           |                             |                                       |                |
| Figure Panel | Groups Compared                     | Statistical Test Used | P value        | Exact or approximate P value? | P value summary                     | Significantly different (P < 0.05)? | One- or two-tailed P value? | Sum of ranks in column A,B            | Mann-Whitney U |
| 2C           | FT237 pscram-miR vs pmiR-181a WK2   | Mann Whitney U test   | 0.0971         | Exact                         | ns                                  | No                                  | Two-tailed                  | 83 , 127                              | 28             |
| 2C           | FT237 pscram-miR vs antimir WK2     | Mann Whitney U test   | 0.0016         | Exact                         | **                                  | Yes                                 | Two-tailed                  | 65.50 , 144.5                         | 10.5           |
| 2C           | FT237 pscram-miR vs pmiR-181a WK4   | Mann Whitney U test   | 0.0002         | Exact                         | ***                                 | Yes                                 | Two-tailed                  | 60.50 , 149.5                         | 5.5            |
| 2C           | FT237 pscram-miR vs antimir WK4     | Mann Whitney U test   | 0.0015         | Exact                         | **                                  | Yes                                 | Two-tailed                  | 66 , 144                              | 11             |
| 2C           | FT237 pscram-miR vs pmiR-181a WK6   | Mann Whitney U test   | 0.0002         | Exact                         | ***                                 | Yes                                 | Two-tailed                  | 61 , 149                              | 6              |
| 2C           | FT237 pscram-miR vs antimir WK6     | Mann Whitney U test   | 0.0035         | Exact                         | **                                  | Yes                                 | Two-tailed                  | 69.50 , 140.5                         | 14.5           |
| 2C           | FT237 pscram-miR vs pmiR-181a WK8   | Mann Whitney U test   | 0.0001         | Exact                         | ***                                 | Yes                                 | Two-tailed                  | 60 , 150                              | 5              |
| 2C           | FT237 pscram-miR vs antimir WK8     | Mann Whitney U test   | 0.0007         | Exact                         | ***                                 | Yes                                 | Two-tailed                  | 65 , 145                              | 10             |
| 2C           | FT237 pscram-miR vs pmiR-181a WK10  | Mann Whitney U test   | 0.0001         | Exact                         | ***                                 | Yes                                 | Two-tailed                  | 60 , 150                              | 5              |
| 2C           | FT237 pscram-miR vs antimir WK10    | Mann Whitney U test   | 0.0108         | Exact                         | *                                   | Yes                                 | Two-tailed                  | 75 , 135                              | 20             |
| 2C           | FT237 pscram-miR vs pmiR-181a WK12  | Mann Whitney U test   | 0.0001         | Exact                         | ***                                 | Yes                                 | Two-tailed                  | 60 , 150                              | 5              |
| 2C           | FT237 pscram-miR vs antimir WK12    | Mann Whitney U test   | 0.0108         | Exact                         | *                                   | Yes                                 | Two-tailed                  | 75 , 135                              | 20             |
| 2C           | FT237 pscram-miR vs pmiR-181a WK14  | Mann Whitney U test   | 0.0001         | Exact                         | ***                                 | Yes                                 | Two-tailed                  | 60 , 150                              | 5              |
| 2C           | FT237 pscram-miR vs antimir WK14    | Mann Whitney U test   | 0.0108         | Exact                         | *                                   | Yes                                 | Two-tailed                  | 75 , 135                              | 20             |
| 2C           | FT237 pscram-miR vs pmiR-181a WK16  | Mann Whitney U test   | 0.0001         | Exact                         | ***                                 | Yes                                 | Two-tailed                  | 60 , 150                              | 5              |
| 2C           | FT237 pscram-miR vs antimir WK16    | Mann Whitney U test   | 0.0325         | Exact                         | *                                   | Yes                                 | Two-tailed                  | 80 , 130                              | 25             |
| 2C           | FT237 pscram-miR vs pmiR-181a WK18  | Mann Whitney U test   | 0.0001         | Exact                         | ***                                 | Yes                                 | Two-tailed                  | 60 , 150                              | 5              |
| 2C           | FT237 pscram-miR vs antimir WK18    | Mann Whitney U test   | 0.0867         | Exact                         | ns                                  | No                                  | Two-tailed                  | 85 , 125                              | 30             |
| 2C           | FT237 pscram-miR vs pmiR-181a WK 20 | Mann Whitney U test   | 0.0001         | Exact                         | ***                                 | Yes                                 | Two-tailed                  | 60 , 150                              | 5              |
| 2C           | FT237 pscram-miR vs antimir WK20    | Mann Whitney U test   | 0.0867         | Exact                         | ns                                  | No                                  | Two-tailed                  | 85 , 125                              | 30             |
| 2C           | FT237 pscram-miR vs pmiR-181a WK22  | Mann Whitney U test   | 0.0001         | Exact                         | ***                                 | Yes                                 | Two-tailed                  | 60 , 150                              | 5              |
| 2C           | FT237 pscram-miR vs antimir WK22    | Mann Whitney U test   | 0.2105         | Exact                         | ns                                  | No                                  | Two-tailed                  | 90 , 120                              | 35             |
| 2C           | FT237 pscram-miR vs pmiR-181a WK25  | Mann Whitney U test   | 0.0001         | Exact                         | ***                                 | Yes                                 | Two-tailed                  | 60 , 150                              | 5              |
| 2C           | FT237 pscram-miR vs antimir WK25    | Mann Whitney U test   | 0.2105         | Exact                         | ns                                  | No                                  | Two-tailed                  | 90 , 120                              | 35             |
| 2D           | FT237 pscram-miR vs pmiR-181a       | Mann Whitney U test   | 0.0001         | Exact                         | ***                                 | Yes                                 | Two-tailed                  | 60 , 150                              | 5              |
| 2D           | FT237 pscram-miR vs antimir         | Mann Whitney U test   | >0.9999        | Exact                         | ns                                  | No                                  | Two-tailed                  | 100 , 110                             | 45             |
| 2D           | FT237 pmiR-181a vs antimir          | Mann Whitney U test   | 0.0001         | Exact                         | ***                                 | Yes                                 | Two-tailed                  | 149.5 , 60.50                         | 5.5            |
| Figure Panel | Groups Compared                     | Statistical Test Used | Chi-square, df | z                             | P value                             | P value summary                     | One- or two-sided           | Statistically significant (P < 0.05)? |                |
| 2G           | FT237 pscram-miR vs pmiR-181a       | Chi Square            | 3.692, 1       | 1.922                         | 0.0547                              | ns                                  | Two-sided                   | No                                    |                |
| 2G           | FT237 pscram-miR vs pmiR-181a       | Chi Square            | 3.692, 1       | 1.922                         | 0.0547                              | ns                                  | Two-sided                   | No                                    |                |
| Figure Panel | Groups Compared                     | Statistical Test Used | P value        | Exact or approximate P value? | P value summary                     | Significantly different (P < 0.05)? | One- or two-tailed P value? | Sum of ranks in column A,B            | Mann-Whitney U |
| 2H           | FT237 pscram-miR vs pmiR-181a       | Mann Whitney U test   | 0.2            | Exact                         | ns                                  | No                                  | Two-tailed                  | 56 , 80                               | 20             |

**Supplemental Table 5: Figure 3 Statistical Tests**

| Figure Panel | Groups Compared                       | Statistical Test Used | P value        | P value summary | Significantly different (P < 0.05)? | One- or two-tailed P value? | t, df             | Difference of Means 95% Confidence Interval |
|--------------|---------------------------------------|-----------------------|----------------|-----------------|-------------------------------------|-----------------------------|-------------------|---------------------------------------------|
| 3A           | FT237 pscram-miR vs pmiR-181a 1-0.8   | Unpaired t test       | 0.003          | **              | Yes                                 | Two-tailed                  | t=6.442, df=4     | -54.94 to -21.84                            |
| 3A           | FT237 pscram-miR vs antimiR 1-0.8     | Unpaired t test       | 0.9683         | ns              | No                                  | Two-tailed                  | t=0.04234, df=4   | -8.134 to 7.890                             |
| 3A           | FT237 pmiR-181a vs antimiR 1-0.8      | Unpaired t test       | 0.0034         | **              | Yes                                 | Two-tailed                  | t=6.220, df=4     | 21.19 to 55.35                              |
| 3A           | FT237 pscram-miR vs pmiR-181a 0.8-0.6 | Unpaired t test       | 0.0081         | **              | Yes                                 | Two-tailed                  | t=4.886, df=4     | 6.744 to 24.50                              |
| 3A           | FT237 pscram-miR vs antimiR 0.8-0.6   | Unpaired t test       | 0.1913         | ns              | No                                  | Two-tailed                  | t=1.571, df=4     | -16.39 to 4.546                             |
| 3A           | FT237 pmiR-181a vs antimiR 0.8-0.6    | Unpaired t test       | 0.0077         | **              | Yes                                 | Two-tailed                  | t=4.966, df=4     | -33.59 to -9.498                            |
| 3A           | FT237 pscram-miR vs pmiR-181a 0.6-0.3 | Unpaired t test       | 0.0006         | ***             | Yes                                 | Two-tailed                  | t=9.957, df=4     | 15.04 to 26.68                              |
| 3A           | FT237 pscram-miR vs antimiR 0.6-0.3   | Unpaired t test       | 0.0386         | *               | Yes                                 | Two-tailed                  | t=3.034, df=4     | 0.4402 to 9.939                             |
| 3A           | FT237 pmiR-181a vs antimiR 0.6-0.3    | Unpaired t test       | 0.0035         | **              | Yes                                 | Two-tailed                  | t=6.164, df=4     | -22.73 to -8.612                            |
| 3C           | FT237 pscram-miR vs pmiR-181a         | Unpaired t test       | <0.0001        | ****            | Yes                                 | Two-tailed                  | t=11.72, df=8     | 42.09 to 62.71                              |
| 3C           | FT237 pscram-miR vs antimiR           | Unpaired t test       | 0.0005         | ***             | Yes                                 | Two-tailed                  | t=5.688, df=8     | 4.495 to 10.62                              |
| 3C           | FT237 pmiR-181a vs antimiR            | Unpaired t test       | <0.0001        | ****            | Yes                                 | Two-tailed                  | t=9.769, df=8     | -55.42 to -34.26                            |
| 3D           | FT237 pscram-miR vs pmiR-181a         | Unpaired t test       | <0.0001        | ****            | Yes                                 | Two-tailed                  | t=6.129, df=146   | 1.630 to 3.181                              |
| 3D           | FT237 pscram-miR vs antimiR           | Unpaired t test       | 0.0674         | ns              | No                                  | Two-tailed                  | t=1.843, df=146   | -0.007844 to 0.2241                         |
| 3D           | FT237 pmiR-181a vs antimiR            | Unpaired t test       | <0.0001        | ****            | Yes                                 | Two-tailed                  | t=5.802, df=146   | -3.080 to -1.515                            |
| 3E           | FT237 pscram-miR vs pmiR-181a         | Unpaired t test       | <0.0001        | ****            | Yes                                 | Two-tailed                  | t=7.359, df=118   | 51.79 to 89.91                              |
| 3E           | FT237 pscram-miR vs antimiR           | Unpaired t test       | 0.0181         | *               | Yes                                 | Two-tailed                  | t=2.398, df=118   | -21.52 to -2.051                            |
| 3E           | FT237 pmiR-181a vs antimiR            | Unpaired t test       | <0.0001        | ****            | Yes                                 | Two-tailed                  | t=8.422, df=118   | -102.1 to -63.20                            |
| 3F           | FT237 pscram-miR vs pmiR-181a LC      | Unpaired t test       | <0.0001        | ****            | Yes                                 | Two-tailed                  | t=11.69, df=6     | 15.67 to 23.96                              |
| 3F           | FT237 pscram-miR vs antimiR LC        | Unpaired t test       | 0.6394         | ns              | No                                  | Two-tailed                  | t=0.4933, df=6    | -2.242 to 3.375                             |
| 3F           | FT237 pmiR-181a vs antimiR LC         | Unpaired t test       | <0.0001        | ****            | Yes                                 | Two-tailed                  | t=11.34, df=6     | -23.40 to -15.09                            |
| 3F           | FT237 pscram-miR vs pmiR-181a NB      | Unpaired t test       | <0.0001        | ****            | Yes                                 | Two-tailed                  | t=9.625, df=6     | 19.99 to 33.62                              |
| 3F           | FT237 pscram-miR vs antimiR NB        | Unpaired t test       | 0.4575         | ns              | No                                  | Two-tailed                  | t=0.7938, df=6    | -1.833 to 3.593                             |
| 3F           | FT237 pmiR-181a vs antimiR NB         | Unpaired t test       | <0.0001        | ****            | Yes                                 | Two-tailed                  | t=9.521, df=6     | -32.59 to -19.26                            |
| 3F           | FT237 pscram-miR vs pmiR-181a FC      | Unpaired t test       | 0.0005         | ***             | Yes                                 | Two-tailed                  | t=6.695, df=6     | 9.604 to 20.67                              |
| 3F           | FT237 pscram-miR vs antimiR FC        | Unpaired t test       | 0.889          | ns              | No                                  | Two-tailed                  | t=0.1456, df=6    | -1.123 to 0.9968                            |
| 3F           | FT237 pmiR-181a vs antimiR FC         | Unpaired t test       | 0.0005         | ***             | Yes                                 | Two-tailed                  | t=6.737, df=6     | -20.72 to -9.679                            |
| 3F           | FT237 pscram-miR vs pmiR-181a MC      | Unpaired t test       | <0.0001        | ****            | Yes                                 | Two-tailed                  | t=16.00, df=6     | 4.282 to 5.828                              |
| 3F           | FT237 pscram-miR vs antimiR MC        | Unpaired t test       | 0.3559         | ns              | No                                  | Two-tailed                  | t=1.000, df=6     | -0.3617 to 0.8617                           |
| 3F           | FT237 pmiR-181a vs antimiR MC         | Unpaired t test       | <0.0001        | ****            | Yes                                 | Two-tailed                  | t=11.93, df=6     | -5.791 to -3.819                            |
| Figure Panel | Groups Compared                       | Statistical Test Used | Chi-square, df | z               | P value                             | P value summary             | One- or two-sided | Statistically significant (P < 0.05)?       |
| 3G           | FT237 pscram-miR vs pmiR-181a DP      | Chi Square            | 7.254, 1       | 2.693           | 0.0071                              | **                          | Two-sided         | Yes                                         |
| 3G           | FT237 pscram-miR vs antimiR DP        | Chi Square            | 0.000, 1       | 0               | >0.9999                             | ns                          | Two-sided         | No                                          |
| 3G           | FT237 pscram-miR vs pmiR-181a P       | Chi Square            | 116.2, 1       | 10.78           | <0.0001                             | ****                        | Two-sided         | Yes                                         |
| 3G           | FT237 pscram-miR vs antimiR P         | Chi Square            | 2.696, 1       | 1.642           | 0.1006                              | ns                          | Two-sided         | No                                          |
| 3G           | FT237 pscram-miR vs pmiR-181a B       | Chi Square            | 1.846, 1       | 1.359           | 0.1742                              | ns                          | Two-sided         | No                                          |
| 3G           | FT237 pscram-miR vs antimiR B         | Chi Square            | 3.532, 1       | 1.879           | 0.0602                              | ns                          | Two-sided         | No                                          |
| 3G           | FT237 pscram-miR vs pmiR-181a G       | Chi Square            | 1.005, 1       | 1.003           | 0.3161                              | ns                          | Two-sided         | No                                          |
| 3G           | FT237 pscram-miR vs antimiR G         | Chi Square            | NA             | NA              | NA                                  | NA                          | NA                | NA                                          |
| 3G           | FT237 pscram-miR vs pmiR-181a Y       | Chi Square            | 6.186, 1       | 2.487           | 0.0129                              | *                           | Two-sided         | Yes                                         |
| 3G           | FT237 pscram-miR vs antimiR Y         | Chi Square            | NA             | NA              | NA                                  | NA                          | NA                | NA                                          |
| 3G           | FT237 pscram-miR vs pmiR-181a BO      | Chi Square            | 87.77, 1       | 9.369           | <0.0001                             | ****                        | Two-sided         | Yes                                         |
| 3G           | FT237 pscram-miR vs antimiR BO        | Chi Square            | NA             | NA              | NA                                  | NA                          | NA                | NA                                          |
| 3G           | FT237 pscram-miR vs pmiR-181a DO      | Chi Square            | 13.21, 1       | 3.635           | 0.0003                              | ***                         | Two-sided         | Yes                                         |
| 3G           | FT237 pscram-miR vs antimiR DO        | Chi Square            | 0.1480, 1      | 0.3848          | 0.7004                              | ns                          | Two-sided         | No                                          |
| 3G           | FT237 pscram-miR vs pmiR-181a BR      | Chi Square            | 4.082, 1       | 2.02            | 0.0434                              | *                           | Two-sided         | Yes                                         |
| 3G           | FT237 pscram-miR vs antimiR BR        | Chi Square            | NA             | NA              | NA                                  | NA                          | NA                | NA                                          |
| 3G           | FT237 pscram-miR vs pmiR-181a DR      | Chi Square            | NA             | NA              | NA                                  | NA                          | NA                | NA                                          |
| 3G           | FT237 pscram-miR vs antimiR DR        | Chi Square            | 6.105, 1       | 2.471           | 0.0135                              | *                           | Two-sided         | Yes                                         |

**Supplemental Table 6: Figure 4 Statistical Tests**

| Figure Panel | Groups Compared               | Statistical Test Used | P value | P value summary | Significantly different (P < 0.05)? | One- or two-tailed P value? | t, df          | Difference of Means 95% Confidence Interval |
|--------------|-------------------------------|-----------------------|---------|-----------------|-------------------------------------|-----------------------------|----------------|---------------------------------------------|
| 4C           | FT237 pscram-miR vs pmiR-181a | Unpaired t test       | <0.0001 | ****            | Yes                                 | Two-tailed                  | t=9.091, df=78 | 32.57 to 50.84                              |
| 4C           | FT237 pscram-miR vs antimiR   | Unpaired t test       | 0.3171  | ns              | No                                  | Two-tailed                  | t=1.007, df=74 | -2.275 to 6.926                             |
| 4C           | FT237 pmiR-181a vs antimiR    | Unpaired t test       | <0.0001 | ****            | Yes                                 | Two-tailed                  | t=8.183, df=76 | -48.96 to -29.80                            |

**Supplemental Table 7: Figure 6 Statistical Tests**

| Figure Panel | Groups Compared                       | Statistical Test Used | P value | P value summary               | Significantly different (P < 0.05)? | One- or two-tailed P value?         | t, df                       | Difference of Means 95% Confidence Interval |                |
|--------------|---------------------------------------|-----------------------|---------|-------------------------------|-------------------------------------|-------------------------------------|-----------------------------|---------------------------------------------|----------------|
| 6B           | FT237 pscram-miR vs pmiR-181a RNA     | Unpaired t test       | <0.0001 | ****                          | Yes                                 | Two-tailed                          | t=15.87, df=4               | -0.5993 to -0.4207                          |                |
| 6B           | FT237 pscram-miR vs antimiR RNA       | Unpaired t test       | 0.9365  | ns                            | No                                  | Two-tailed                          | t=0.08482, df=4             | -0.1058 to 0.1124                           |                |
| 6B           | FT237 pmiR-181a vs antimiR RNA        | Unpaired t test       | 0.0005  | ***                           | Yes                                 | Two-tailed                          | t=10.11, df=4               | 0.3724 to 0.6543                            |                |
| 6B           | FT237 pscram-miR vs pmiR-181a protein | Unpaired t test       | 0.0052  | **                            | Yes                                 | Two-tailed                          | t=5.543, df=4               | -0.6604 to -0.2196                          |                |
| 6B           | FT237 pscram-miR vs antimiR protein   | Unpaired t test       | 0.4125  | ns                            | No                                  | Two-tailed                          | t=0.9139, df=4              | -0.2649 to 0.5249                           |                |
| 6B           | FT237 pmiR-181a vs antimiR protein    | Unpaired t test       | 0.0249  | *                             | Yes                                 | Two-tailed                          | t=3.499, df=4               | 0.1177 to 1.022                             |                |
| 6C           | FT237 pscram-miR vs pmiR-181a         | Unpaired t test       | 0.0002  | ***                           | Yes                                 | Two-tailed                          | t=13.93, df=4               | -0.4757 to -0.3176                          |                |
| 6C           | FT237 pscram-miR vs antimiR           | Unpaired t test       | 0.6493  | ns                            | No                                  | Two-tailed                          | t=0.4907, df=4              | -0.3551 to 0.2484                           |                |
| 6C           | FT237 pmiR-181a vs antimiR            | Unpaired t test       | 0.0378  | *                             | Yes                                 | Two-tailed                          | t=3.056, df=4               | 0.03140 to 0.6553                           |                |
| 6C           | FT237 pscram-miR vs pmiR-181a mut     | Unpaired t test       | <0.0001 | ****                          | Yes                                 | Two-tailed                          | t=31.83, df=4               | 0.3052 to 0.3635                            |                |
| 6C           | FT237 pscram-miR vs antimiR mut       | Unpaired t test       | <0.0001 | ****                          | Yes                                 | Two-tailed                          | t=22.95, df=4               | 0.7355 to 0.9380                            |                |
| 6C           | FT237 pmiR-181a vs antimiR mut        | Unpaired t test       | 0.0002  | ***                           | Yes                                 | Two-tailed                          | t=13.24, df=4               | 0.3970 to 0.6078                            |                |
| 6D           | FT237 pscram-miR vs pmiR-181a RNA     | Unpaired t test       | 0.0021  | **                            | Yes                                 | Two-tailed                          | t=7.112, df=4               | -0.7184 to -0.3150                          |                |
| 6D           | FT237 pscram-miR vs shrb1 RNA         | Unpaired t test       | <0.0001 | ****                          | Yes                                 | Two-tailed                          | t=28.38, df=4               | -0.5782 to -0.4751                          |                |
| 6D           | FT237 pmiR-181a vs shrb1 RNA          | Unpaired t test       | 0.9003  | ns                            | No                                  | Two-tailed                          | t=0.1334, df=4              | -0.2182 to 0.1982                           |                |
| 6D           | FT237 pscram-miR vs pmiR-181a protein | Unpaired t test       | <0.0001 | ****                          | Yes                                 | Two-tailed                          | t=19.39, df=4               | -0.7050 to -0.5284                          |                |
| 6D           | FT237 pscram-miR vs shrb1 protein     | Unpaired t test       | 0.0004  | ***                           | Yes                                 | Two-tailed                          | t=10.78, df=4               | -0.9138 to -0.5395                          |                |
| 6D           | FT237 pmiR-181a vs shrb1 protein      | Unpaired t test       | 0.214   | ns                            | No                                  | Two-tailed                          | t=1.476, df=4               | -0.3169 to 0.09694                          |                |
| 6E           | FT237 pscram-miR vs pmiR-181a         | Unpaired t test       | 0.0003  | ***                           | Yes                                 | Two-tailed                          | t=7.470, df=6               | 14.93 to 29.48                              |                |
| 6E           | FT237 pscram-miR vs shrb1             | Unpaired t test       | <0.0001 | ****                          | Yes                                 | Two-tailed                          | t=23.12, df=6               | 14.64 to 18.11                              |                |
| 6E           | FT237 pmiR-181a vs shrb1              | Unpaired t test       | 0.1049  | ns                            | No                                  | Two-tailed                          | t=1.909, df=6               | -13.31 to 1.645                             |                |
| 6F           | FT237 pscram-miR vs pmiR-181a g2m     | Unpaired t test       | 0.0003  | ***                           | Yes                                 | Two-tailed                          | t=11.90, df=4               | 9.959 to 16.02                              |                |
| 6F           | FT237 pscram-miR vs shrb1 g2m         | Unpaired t test       | <0.0001 | ****                          | Yes                                 | Two-tailed                          | t=16.10, df=4               | 8.782 to 12.44                              |                |
| 6F           | FT237 pmiR-181a vs shrb1 g2m          | Unpaired t test       | 0.0729  | ns                            | No                                  | Two-tailed                          | t=2.419, df=4               | -5.109 to 0.3517                            |                |
| 6F           | FT237 pscram-miR vs pmiR-181a >4N     | Unpaired t test       | 0.0002  | ***                           | Yes                                 | Two-tailed                          | t=12.37, df=4               | 13.04 to 20.59                              |                |
| 6F           | FT237 pscram-miR vs shrb1 >4N         | Unpaired t test       | 0.001   | ***                           | Yes                                 | Two-tailed                          | t=8.617, df=4               | 5.997 to 11.70                              |                |
| 6F           | FT237 pmiR-181a vs shrb1 >4N          | Unpaired t test       | 0.0031  | **                            | Yes                                 | Two-tailed                          | t=6.373, df=4               | -11.44 to -4.497                            |                |
| Figure Panel | Groups Compared                       | Statistical Test Used | P value | P value summary               | Significantly different (P < 0.05)? | One- or two-tailed P value?         |                             |                                             |                |
| 6G           | FT237 pmiR-181a vs shrb1              | Fisher's exact test   | >0.9999 | ns                            | Two-sided                           | No                                  |                             |                                             |                |
| Figure Panel | Groups Compared                       | Statistical Test Used | P value | Exact or approximate P value? | P value summary                     | Significantly different (P < 0.05)? | One- or two-tailed P value? | Sum of ranks in column A,B                  | Mann-Whitney U |
| 6H           | FT237 pmiR-181a vs shrb1 wk2          | Mann Whitney U        | 0.5196  | Exact                         | ns                                  | No                                  | Two-tailed                  | 275.5 , 390.5                               | 139.5          |
| 6H           | FT237 pmiR-181a vs shrb1 wk4          | Mann Whitney U        | 0.2071  | Exact                         | ns                                  | No                                  | Two-tailed                  | 256.5 , 409.5                               | 120.5          |
| 6H           | FT237 pmiR-181a vs shrb1 wk8          | Mann Whitney U        | 0.721   | Exact                         | ns                                  | No                                  | Two-tailed                  | 290.5 , 304.5                               | 133.5          |
| 6H           | FT237 pmiR-181a vs shrb1 wk16         | Mann Whitney U        | 0.0326  | Exact                         | *                                   | Yes                                 | Two-tailed                  | 175.5 , 352.5                               | 70.5           |
| 6H           | FT237 pmiR-181a vs shrb1 wk 34        | Mann Whitney U        | 0.0889  | Exact                         | ns                                  | No                                  | Two-tailed                  | 302 , 259                                   | 88             |
| 6H           | FT237 pmiR-181a vs shrb1 tb           | Mann Whitney U        | 0.7005  | Exact                         | ns                                  | No                                  | Two-tailed                  | 220.5 , 307.5                               | 115.5          |

Supplemental Table 8: Figure 7 Statistical Tests

| Figure Panel | Groups Compared                    | Statistical Test Used | P value | P value summary | Significantly different (P < 0.05)? | One- or two-tailed P value? | t, df           | Difference of Means 95% Confidence Interval |
|--------------|------------------------------------|-----------------------|---------|-----------------|-------------------------------------|-----------------------------|-----------------|---------------------------------------------|
| 7A           | FT237 pscram-miR vs pmiR-181a v    | Unpaired t test       | 0.0011  | **              | Yes                                 | Two-tailed                  | t=8.315, df=4   | -0.4891 to -0.2442                          |
| 7A           | FT237 pscram-miR vs antimiR v      | Unpaired t test       | 0.0004  | ***             | Yes                                 | Two-tailed                  | t=11.24, df=4   | 1.230 to 2.037                              |
| 7A           | FT237 pscram-miR vs shrb1 v        | Unpaired t test       | 0.1583  | ns              | No                                  | Two-tailed                  | t=1.732, df=4   | -0.06030 to 0.2603                          |
| 7A           | FT237 pmiR-181a vs antimiR v       | Unpaired t test       | 0.0002  | ***             | Yes                                 | Two-tailed                  | t=13.17, df=4   | 1.578 to 2.422                              |
| 7A           | FT237 pmiR-181a vs shrb1 v         | Unpaired t test       | 0.003   | **              | Yes                                 | Two-tailed                  | t=6.424, df=4   | 0.2650 to 0.6684                            |
| 7A           | FT237 pscram-miR vs pmiR-181a c    | Unpaired t test       | <0.0001 | ****            | Yes                                 | Two-tailed                  | t=22.37, df=4   | -1.679 to -1.308                            |
| 7A           | FT237 pscram-miR vs antimiR c      | Unpaired t test       | <0.0001 | ****            | Yes                                 | Two-tailed                  | t=16.34, df=4   | 4.469 to 6.298                              |
| 7A           | FT237 pscram-miR vs shrb1 c        | Unpaired t test       | 0.2152  | ns              | No                                  | Two-tailed                  | t=1.471, df=4   | -0.3176 to 0.09756                          |
| 7A           | FT237 pmiR-181a vs antimiR c       | Unpaired t test       | <0.0001 | ****            | Yes                                 | Two-tailed                  | t=21.07, df=4   | 5.971 to 7.783                              |
| 7A           | FT237 pmiR-181a vs shrb1 c         | Unpaired t test       | <0.0001 | ****            | Yes                                 | Two-tailed                  | t=23.20, df=4   | 1.218 to 1.549                              |
| 7B           | FT237 pscram-miR vs pmiR-181a v    | Unpaired t test       | <0.0001 | ****            | Yes                                 | Two-tailed                  | t=16.69, df=4   | -0.7893 to -0.5641                          |
| 7B           | FT237 pscram-miR vs antimiR v      | Unpaired t test       | 0.0094  | **              | Yes                                 | Two-tailed                  | t=4.684, df=4   | 0.3176 to 1.242                             |
| 7B           | FT237 pmiR-181a vs antimiR v       | Unpaired t test       | 0.0011  | **              | Yes                                 | Two-tailed                  | t=8.499, df=4   | 0.9808 to 1.933                             |
| 7B           | FT237 pscram-miR vs pmiR-181a c    | Unpaired t test       | <0.0001 | ****            | Yes                                 | Two-tailed                  | t=19.56, df=4   | -2.916 to -2.191                            |
| 7B           | FT237 pscram-miR vs antimiR c      | Unpaired t test       | 0.0568  | ns              | No                                  | Two-tailed                  | t=2.652, df=4   | -0.06093 to 2.668                           |
| 7B           | FT237 pmiR-181a vs antimiR c       | Unpaired t test       | 0.0013  | **              | Yes                                 | Two-tailed                  | t=7.972, df=4   | 2.514 to 5.200                              |
| 7C           | FT237 pscram-miR vs pmiR-181a      | Unpaired t test       | 0.0022  | **              | Yes                                 | Two-tailed                  | t=7.000, df=4   | -0.6518 to -0.2816                          |
| 7C           | FT237 pscram-miR vs antimiR        | Unpaired t test       | 0.0029  | **              | Yes                                 | Two-tailed                  | t=6.500, df=4   | -0.2474 to -0.09929                         |
| 7C           | FT237 pmiR-181a vs antimiR         | Unpaired t test       | 0.015   | *               | Yes                                 | Two-tailed                  | t=4.085, df=4   | 0.09398 to 0.4927                           |
| 7C           | FT237 pscram-miR vs pmiR-181a mut  | Unpaired t test       | <0.0001 | ****            | Yes                                 | Two-tailed                  | t=24.84, df=4   | 0.4863 to 0.6088                            |
| 7C           | FT237 pscram-miR vs antimiR mut    | Unpaired t test       | 0.001   | ***             | Yes                                 | Two-tailed                  | t=8.722, df=4   | 0.7316 to 1.415                             |
| 7C           | FT237 pmiR-181a vs antimiR mut     | Unpaired t test       | 0.0136  | *               | Yes                                 | Two-tailed                  | t=4.205, df=4   | 0.1785 to 0.8726                            |
| 7D           | FT237 pscram-miR vs pmiR-181a 2.5  | Unpaired t test       | <0.0001 | ****            | Yes                                 | Two-tailed                  | t=24.94, df=4   | 0.3004 to 0.3757                            |
| 7D           | FT237 pscram-miR vs antimiR 2.5    | Unpaired t test       | 0.0413  | *               | Yes                                 | Two-tailed                  | t=2.967, df=4   | 0.006561 to 0.1980                          |
| 7D           | FT237 pscram-miR vs shrb1 2.5      | Unpaired t test       | 0.0882  | ns              | No                                  | Two-tailed                  | t=2.244, df=4   | -0.02426 to 0.2289                          |
| 7D           | FT237 pscram-miR vs pmiR-181a 5    | Unpaired t test       | <0.0001 | ****            | Yes                                 | Two-tailed                  | t=17.05, df=4   | 0.2713 to 0.3768                            |
| 7D           | FT237 pscram-miR vs antimiR 5      | Unpaired t test       | 0.0039  | **              | Yes                                 | Two-tailed                  | t=5.979, df=4   | 0.07684 to 0.2101                           |
| 7D           | FT237 pscram-miR vs shrb1 5        | Unpaired t test       | 0.3508  | ns              | No                                  | Two-tailed                  | t=1.055, df=4   | -0.08661 to 0.1928                          |
| 7D           | FT237 pscram-miR vs pmiR-181a 10   | Unpaired t test       | 0.0004  | ***             | Yes                                 | Two-tailed                  | t=10.97, df=4   | 0.2420 to 0.4059                            |
| 7D           | FT237 pscram-miR vs antimiR 10     | Unpaired t test       | 0.0329  | *               | Yes                                 | Two-tailed                  | t=3.199, df=4   | 0.007599 to 0.1076                          |
| 7D           | FT237 pscram-miR vs shrb1 10       | Unpaired t test       | 0.0564  | ns              | No                                  | Two-tailed                  | t=2.660, df=4   | -0.002266 to 0.1061                         |
| 7D           | FT237 pscram-miR vs pmiR-181a 20   | Unpaired t test       | 0.0006  | ***             | Yes                                 | Two-tailed                  | t=10.05, df=4   | 0.3131 to 0.5523                            |
| 7D           | FT237 pscram-miR vs antimiR 20     | Unpaired t test       | 0.0675  | ns              | No                                  | Two-tailed                  | t=2.490, df=4   | -0.01029 to 0.1890                          |
| 7D           | FT237 pscram-miR vs shrb1 20       | Unpaired t test       | 0.0819  | ns              | No                                  | Two-tailed                  | t=2.311, df=4   | -0.01881 to 0.2057                          |
| 7E           | FT237 pscram-miR v vs pscram-miR c | Unpaired t test       | 0.0006  | ***             | Yes                                 | Two-tailed                  | t=9.799, df=4   | 22.69 to 40.64                              |
| 7E           | FT237 pscram-miR v vs pmiR-181a v  | Unpaired t test       | 0.0249  | *               | Yes                                 | Two-tailed                  | t=3.500, df=4   | -4.184 to -0.4824                           |
| 7E           | FT237 pscram-miR v vs pmiR-181a c  | Unpaired t test       | 0.0002  | ***             | Yes                                 | Two-tailed                  | t=12.97, df=4   | 10.74 to 16.59                              |
| 7E           | FT237 pscram-miR v vs antimiR v    | Unpaired t test       | 0.3739  | ns              | No                                  | Two-tailed                  | t=1.000, df=4   | -1.184 to 2.518                             |
| 7E           | FT237 pscram-miR v vs antimiR c    | Unpaired t test       | 0.0042  | **              | Yes                                 | Two-tailed                  | t=5.860, df=4   | 17.89 to 50.11                              |
| 7E           | FT237 pscram-miR c vs pmiR-181a c  | Unpaired t test       | 0.0055  | **              | Yes                                 | Two-tailed                  | t=5.455, df=4   | -27.16 to -8.838                            |
| 7E           | FT237 pscram-miR c vs antimiR c    | Unpaired t test       | 0.7412  | ns              | No                                  | Two-tailed                  | t=0.3540, df=4  | -15.97 to 20.63                             |
| 7E           | FT237 pmiR-181a c vs antimiR c     | Unpaired t test       | 0.0253  | *               | Yes                                 | Two-tailed                  | t=3.481, df=4   | 4.118 to 36.55                              |
| 7F           | FT237 pscram-miR vs pmiR-181a      | Unpaired t test       | 0.0068  | **              | Yes                                 | Two-tailed                  | t=5.142, df=4   | -0.8862 to -0.2647                          |
| 7F           | FT237 pscram-miR vs shst1          | Unpaired t test       | 0.0046  | **              | Yes                                 | Two-tailed                  | t=5.740, df=4   | -0.8395 to -0.2921                          |
| 7F           | FT237 pscram-miR vs shst2          | Unpaired t test       | <0.0001 | ****            | Yes                                 | Two-tailed                  | t=49.92, df=4   | -0.9544 to -0.8538                          |
| 7F           | FT237 pmiR-181a vs shst1           | Unpaired t test       | 0.9515  | ns              | No                                  | Two-tailed                  | t=0.06479, df=4 | -0.4044 to 0.4237                           |
| 7F           | FT237 pmiR-181a vs shst2           | Unpaired t test       | 0.0442  | *               | Yes                                 | Two-tailed                  | t=2.899, df=4   | -0.6434 to -0.01390                         |

**Supplemental Table 9: Figure 7 Statistical Tests continued**

| Figure Panel | Groups Compared                    | Statistical Test Used | P value | P value summary | Significantly different (P < 0.05)? | One- or two-tailed P value? | t, df           | Difference of Means 95% Confidence Interval |
|--------------|------------------------------------|-----------------------|---------|-----------------|-------------------------------------|-----------------------------|-----------------|---------------------------------------------|
| 7G           | FT237 pscram-miR v vs pscram-miR c | Unpaired t test       | <0.0001 | ****            | Yes                                 | Two-tailed                  | t=26.63, df=4   | -0.6679 to -0.5418                          |
| 7G           | FT237 pmiR-181a v vs miR-181a c    | Unpaired t test       | 0.3972  | ns              | No                                  | Two-tailed                  | t=0.9472, df=4  | -0.1630 to 0.08006                          |
| 7G           | FT237 shst1 v vs shst1 c           | Unpaired t test       | 0.2576  | ns              | No                                  | Two-tailed                  | t=1.319, df=4   | -0.2126 to 0.07563                          |
| 7G           | FT237 shst2 v vs shst2 c           | Unpaired t test       | 0.0093  | **              | Yes                                 | Two-tailed                  | t=4.708, df=4   | -0.2121 to -0.05473                         |
| 7G           | FT237 pscram-miR vs pmiR-181a d2   | Unpaired t test       | <0.0001 | ****            | Yes                                 | Two-tailed                  | t=31.31, df=4   | 2.857 to 3.412                              |
| 7G           | FT237 pscram-miR vs shst1 d2       | Unpaired t test       | 0.0005  | ***             | Yes                                 | Two-tailed                  | t=10.31, df=4   | 1.514 to 2.631                              |
| 7G           | FT237 pscram-miR vs shst2 d2       | Unpaired t test       | <0.0001 | ****            | Yes                                 | Two-tailed                  | t=19.15, df=4   | 1.176 to 1.574                              |
| 7G           | FT237 pscram-miR vs pmiR-181a d4   | Unpaired t test       | <0.0001 | ****            | Yes                                 | Two-tailed                  | t=19.89, df=4   | 5.529 to 7.323                              |
| 7G           | FT237 pscram-miR vs shst1 d4       | Unpaired t test       | 0.0003  | ***             | Yes                                 | Two-tailed                  | t=12.12, df=4   | 4.853 to 7.737                              |
| 7G           | FT237 pscram-miR vs shst2 d4       | Unpaired t test       | 0.0016  | **              | Yes                                 | Two-tailed                  | t=7.566, df=4   | 3.735 to 8.066                              |
| 7G           | FT237 pscram-miR vs pmiR-181a d8   | Unpaired t test       | 0.0016  | **              | Yes                                 | Two-tailed                  | t=7.598, df=4   | 7.641 to 16.44                              |
| 7G           | FT237 pscram-miR vs shst1 d8       | Unpaired t test       | 0.0005  | ***             | Yes                                 | Two-tailed                  | t=10.21, df=4   | 10.20 to 17.81                              |
| 7G           | FT237 pscram-miR vs shst2 d8       | Unpaired t test       | <0.0001 | ****            | Yes                                 | Two-tailed                  | t=19.92, df=4   | 15.66 to 20.73                              |
| 7H           | FT237 pscram-miR vs pmiR-181a      | Unpaired t test       | 0.0099  | **              | Yes                                 | Two-tailed                  | t=4.623, df=4   | 0.6589 to 2.640                             |
| 7H           | FT237 pscram-miR vs shst1          | Unpaired t test       | 0.0055  | **              | Yes                                 | Two-tailed                  | t=5.444, df=4   | 0.7209 to 2.221                             |
| 7H           | FT237 pscram-miR vs shst2          | Unpaired t test       | 0.0007  | ***             | Yes                                 | Two-tailed                  | t=9.379, df=4   | 1.144 to 2.106                              |
| 7H           | FT237 pmiR-181a vs shst1           | Unpaired t test       | 0.7105  | ns              | No                                  | Two-tailed                  | t=0.3986, df=4  | -1.421 to 1.064                             |
| 7H           | FT237 pmiR-181a vs shst2           | Unpaired t test       | 0.9528  | ns              | No                                  | Two-tailed                  | t=0.06299, df=4 | -1.126 to 1.076                             |
| 7I           | FT237 pscram-miR vs pmiR-181a      | Unpaired t test       | 0.0009  | ***             | Yes                                 | Two-tailed                  | t=8.912, df=4   | 12.05 to 22.95                              |
| 7I           | FT237 pscram-miR vs shst1          | Unpaired t test       | 0.0107  | *               | Yes                                 | Two-tailed                  | t=4.513, df=4   | 1.947 to 8.172                              |
| 7I           | FT237 pscram-miR vs shst2          | Unpaired t test       | 0.0084  | **              | Yes                                 | Two-tailed                  | t=4.844, df=4   | 6.351 to 23.41                              |
| 7I           | FT237 pmiR-181a vs shst1           | Unpaired t test       | 0.0053  | **              | Yes                                 | Two-tailed                  | t=5.504, df=4   | -18.71 to -6.163                            |
| 7I           | FT237 pmiR-181a vs shst2           | Unpaired t test       | 0.5125  | ns              | No                                  | Two-tailed                  | t=0.7179, df=4  | -12.74 to 7.503                             |
| 7K           | FT237 pscram-miR vs pmiR-181a g2m  | Unpaired t test       | 0.0001  | ***             | Yes                                 | Two-tailed                  | t=15.12, df=4   | 11.95 to 17.32                              |
| 7K           | FT237 pscram-miR vs shst1 g2m      | Unpaired t test       | 0.0001  | ***             | Yes                                 | Two-tailed                  | t=14.97, df=4   | 11.10 to 16.16                              |
| 7K           | FT237 pscram-miR vs shst2 g2m      | Unpaired t test       | 0.0005  | ***             | Yes                                 | Two-tailed                  | t=10.37, df=4   | 7.742 to 13.40                              |
| 7K           | FT237 pmiR-181a vs shst1 g2m       | Unpaired t test       | 0.1134  | ns              | No                                  | Two-tailed                  | t=2.021, df=4   | -2.382 to 0.3752                            |
| 7K           | FT237 pmiR-181a vs shst2 g2m       | Unpaired t test       | 0.0039  | **              | Yes                                 | Two-tailed                  | t=6.008, df=4   | -5.940 to -2.185                            |
| 7K           | FT237 pscram-miR vs pmiR-181a >4n  | Unpaired t test       | 0.023   | *               | Yes                                 | Two-tailed                  | t=3.588, df=4   | 1.843 to 14.45                              |
| 7K           | FT237 pscram-miR vs shst1 >4n      | Unpaired t test       | 0.0034  | **              | Yes                                 | Two-tailed                  | t=6.227, df=4   | 2.859 to 7.460                              |
| 7K           | FT237 pscram-miR vs shst2 >4n      | Unpaired t test       | 0.0019  | **              | Yes                                 | Two-tailed                  | t=7.254, df=4   | 3.205 to 7.180                              |
| 7K           | FT237 pmiR-181a vs shst1 >4n       | Unpaired t test       | 0.2538  | ns              | No                                  | Two-tailed                  | t=1.332, df=4   | -9.215 to 3.241                             |
| 7K           | FT237 pmiR-181a vs shst2 >4n       | Unpaired t test       | 0.2512  | ns              | No                                  | Two-tailed                  | t=1.340, df=4   | -9.073 to 3.165                             |
| 7L           | FT237 pscram-miR vs pmiR-181a      | Unpaired t test       | 0.0014  | **              | Yes                                 | Two-tailed                  | t=7.869, df=4   | 11.86 to 24.79                              |
| 7L           | FT237 pscram-miR vs shst1          | Unpaired t test       | 0.0004  | ***             | Yes                                 | Two-tailed                  | t=10.99, df=4   | 21.53 to 36.08                              |
| 7L           | FT237 pscram-miR vs shst2          | Unpaired t test       | 0.0001  | ***             | Yes                                 | Two-tailed                  | t=15.29, df=4   | 35.26 to 50.91                              |
| 7L           | FT237 pmiR-181a vs shst1           | Unpaired t test       | 0.0347  | *               | Yes                                 | Two-tailed                  | t=3.145, df=4   | 1.228 to 19.72                              |
| 7L           | FT237 pmiR-181a vs shst2           | Unpaired t test       | 0.0021  | **              | Yes                                 | Two-tailed                  | t=7.095, df=4   | 15.07 to 34.44                              |
| 7M           | FT237 pscram-miR vs pmiR-181a      | Unpaired t test       | 0.005   | **              | Yes                                 | Two-tailed                  | t=5.588, df=4   | 0.7471 to 2.223                             |
| 7M           | FT237 pscram-miR vs shst1          | Unpaired t test       | 0.0063  | **              | Yes                                 | Two-tailed                  | t=5.245, df=4   | 0.7803 to 2.535                             |
| 7M           | FT237 pscram-miR vs shst2          | Unpaired t test       | 0.0112  | *               | Yes                                 | Two-tailed                  | t=4.456, df=4   | 1.446 to 6.228                              |
| 7M           | FT237 pmiR-181a vs shst1           | Unpaired t test       | 0.6969  | ns              | No                                  | Two-tailed                  | t=0.4188, df=4  | -0.9735 to 1.319                            |
| 7M           | FT237 pmiR-181a vs shst2           | Unpaired t test       | 0.0594  | ns              | No                                  | Two-tailed                  | t=2.610, df=4   | -0.1502 to 4.854                            |

**Supplemental Table 10: Figure 8 Statistical Tests**

| Figure Panel | Groups Compared       | Statistical Test Used | P value | Exact or approximate P value? | P value summary | Significantly different (P < 0.05)? | One- or two-tailed P value? | Sum of ranks in column A,B | Mann-Whitney U |
|--------------|-----------------------|-----------------------|---------|-------------------------------|-----------------|-------------------------------------|-----------------------------|----------------------------|----------------|
| 8B           | 181a high vs 181a low | Mann Whitney U test   | 0.0024  | Approximate                   | **              | Yes                                 | Two-tailed                  | 18297 , 14344              | 6343           |
| 8C           | 181a high vs 181a low | Mann Whitney U test   | 0.0033  | Approximate                   | **              | Yes                                 | Two-tailed                  | 22947 , 18381              | 8228           |
| 8D           | 181a high vs 181a low | Mann Whitney U test   | 0.0007  | Approximate                   | ***             | Yes                                 | Two-tailed                  | 18502 , 14138              | 6137           |
| 8E           | 181a high vs 181a low | Mann Whitney U test   | 0.0361  | Approximate                   | *               | Yes                                 | Two-tailed                  | 22353 , 18975              | 8822           |

**Supplemental Table 11: Supplemental Figure 1 Statistical Tests**

| Figure Panel | Groups Compared                   | Statistical Test Used | P value | P value summary | Significantly different (P < 0.05)? | One- or two-tailed P value? | t, df         | Difference of Means 95% Confidence Interval |
|--------------|-----------------------------------|-----------------------|---------|-----------------|-------------------------------------|-----------------------------|---------------|---------------------------------------------|
| S1B          | FT237 pscram-miR vs pmiR-181a     | Unpaired t test       | <0.0001 | ****            | Yes                                 | Two-tailed                  | t=17.24, df=4 | 19.97 to 27.65                              |
| S1B          | FT237 pscram-miR vs antimiR       | Unpaired t test       | 0.0003  | ***             | Yes                                 | Two-tailed                  | t=11.36, df=4 | 7.304 to 12.03                              |
| S1B          | FT237 pmiR-181a vs antimiR        | Unpaired t test       | 0.001   | ***             | Yes                                 | Two-tailed                  | t=8.716, df=4 | -18.65 to -9.638                            |
| S1D          | FT237 pscram-miR vs pmiR-181a d4  | Unpaired t test       | 0.0002  | ***             | Yes                                 | Two-tailed                  | t=12.96, df=4 | 1.327 to 2.051                              |
| S1D          | FT237 pscram-miR vs antimiR d4    | Unpaired t test       | 0.0003  | ***             | Yes                                 | Two-tailed                  | t=12.07, df=4 | 1.799 to 2.874                              |
| S1D          | FT237 pscram-miR vs pmiR-181a d8  | Unpaired t test       | <0.0001 | ****            | Yes                                 | Two-tailed                  | t=16.55, df=4 | 6.081 to 8.532                              |
| S1D          | FT237 pscram-miR vs antimiR d8    | Unpaired t test       | 0.0672  | ns              | No                                  | Two-tailed                  | t=2.494, df=4 | -0.1395 to 2.604                            |
| S1D          | FT237 pscram-miR vs pmiR-181a d10 | Unpaired t test       | 0.0003  | ***             | Yes                                 | Two-tailed                  | t=12.30, df=4 | 7.803 to 12.35                              |
| S1D          | FT237 pscram-miR vs antimiR d10   | Unpaired t test       | 0.0042  | **              | Yes                                 | Two-tailed                  | t=5.860, df=4 | 2.066 to 5.786                              |
| S1D          | FT237 pmiR-181a vs antimiR d10    | Unpaired t test       | 0.0021  | **              | Yes                                 | Two-tailed                  | t=7.058, df=4 | -8.572 to -3.732                            |
| S1E          | FT237 pscram-miR vs pmiR-181a     | Unpaired t test       | 0.0002  | ***             | Yes                                 | Two-tailed                  | t=13.34, df=4 | 89.74 to 136.9                              |
| S1E          | FT237 pscram-miR vs antimiR       | Unpaired t test       | 0.0022  | **              | Yes                                 | Two-tailed                  | t=6.978, df=4 | 35.93 to 83.41                              |
| S1E          | FT237 pmiR-181a vs antimiR        | Unpaired t test       | 0.0095  | **              | Yes                                 | Two-tailed                  | t=4.675, df=4 | -85.54 to -21.79                            |
| S1F          | FT237 pscram-miR vs pmiR-181a     | Unpaired t test       | 0.0002  | ***             | Yes                                 | Two-tailed                  | t=12.45, df=4 | 13.51 to 21.27                              |
| S1F          | FT237 pscram-miR vs antimiR       | Unpaired t test       | 0.0002  | ***             | Yes                                 | Two-tailed                  | t=13.59, df=4 | 2.888 to 4.371                              |
| S1F          | FT237 pmiR-181a vs antimiR        | Unpaired t test       | 0.0006  | ***             | Yes                                 | Two-tailed                  | t=9.699, df=4 | -17.70 to -9.820                            |
| S1H          | FT237 pscram-miR vs pmiR-181a g2m | Unpaired t test       | <0.0001 | ****            | Yes                                 | Two-tailed                  | t=16.82, df=4 | 12.87 to 17.96                              |
| S1H          | FT237 pscram-miR vs antimiR g2m   | Unpaired t test       | 0.0024  | **              | Yes                                 | Two-tailed                  | t=6.796, df=4 | 3.151 to 7.503                              |
| S1H          | FT237 pmiR-181a vs antimiR g2m    | Unpaired t test       | 0.0002  | ***             | Yes                                 | Two-tailed                  | t=12.57, df=4 | -12.31 to -7.858                            |
| S1H          | FT237 pscram-miR vs pmiR-181a >4n | Unpaired t test       | 0.0007  | ***             | Yes                                 | Two-tailed                  | t=9.353, df=4 | 4.217 to 7.778                              |
| S1H          | FT237 pscram-miR vs antimiR >4n   | Unpaired t test       | 0.0623  | ns              | No                                  | Two-tailed                  | t=2.564, df=4 | -2.545 to 0.1010                            |
| S1H          | FT237 pmiR-181a vs antimiR >4n    | Unpaired t test       | 0.0004  | ***             | Yes                                 | Two-tailed                  | t=11.14, df=4 | -9.019 to -5.419                            |

**Supplemental Table 12: Supplemental Figure 2 Statistical Tests**

| Figure Panel | Groups Compared                       | Statistical Test Used | P value | P value summary | Significantly different (P < 0.05)? | One- or two-tailed P value? | t, df          | Difference of Means 95% Confidence Interval |
|--------------|---------------------------------------|-----------------------|---------|-----------------|-------------------------------------|-----------------------------|----------------|---------------------------------------------|
| S2A          | FT237 pscram-miR vs pmiR-181a an      | Unpaired t test       | 0.0001  | ***             | Yes                                 | Two-tailed                  | t=14.94, df=4  | 49.48 to 72.07                              |
| S2A          | FT237 pscram-miR vs antimiR an        | Unpaired t test       | 0.0075  | **              | Yes                                 | Two-tailed                  | t=5.002, df=4  | 5.085 to 17.77                              |
| S2A          | FT237 pmiR-181a vs antimiR an         | Unpaired t test       | 0.0001  | ***             | Yes                                 | Two-tailed                  | t=14.52, df=4  | -58.78 to -39.91                            |
| S2A          | FT237 pscram-miR vs pmiR-181a mn      | Unpaired t test       | 0.0011  | **              | Yes                                 | Two-tailed                  | t=8.363, df=4  | 11.43 to 22.80                              |
| S2A          | FT237 pscram-miR vs antimiR mn        | Unpaired t test       | 0.0369  | *               | Yes                                 | Two-tailed                  | t=3.080, df=4  | 0.4362 to 8.414                             |
| S2A          | FT237 pmiR-181a vs antimiR mn         | Unpaired t test       | 0.004   | **              | Yes                                 | Two-tailed                  | t=5.958, df=4  | -18.61 to -6.777                            |
| S2A          | FT237 pscram-miR vs pmiR-181a ml      | Unpaired t test       | 0.0011  | **              | Yes                                 | Two-tailed                  | t=8.456, df=4  | 20.01 to 39.58                              |
| S2A          | FT237 pscram-miR vs antimiR ml        | Unpaired t test       | 0.5771  | ns              | No                                  | Two-tailed                  | t=0.6061, df=4 | -3.743 to 5.833                             |
| S2A          | FT237 pmiR-181a vs antimiR ml         | Unpaired t test       | 0.0016  | **              | Yes                                 | Two-tailed                  | t=7.600, df=4  | -39.26 to -18.25                            |
| S2A          | FT237 pscram-miR vs pmiR-181a bp      | Unpaired t test       | 0.0277  | *               | Yes                                 | Two-tailed                  | t=3.385, df=4  | 1.912 to 19.35                              |
| S2A          | FT237 pscram-miR vs antimiR bp        | Unpaired t test       | 0.8722  | ns              | No                                  | Two-tailed                  | t=0.1715, df=4 | -3.183 to 2.813                             |
| S2A          | FT237 pmiR-181a vs antimiR bp         | Unpaired t test       | 0.0285  | *               | Yes                                 | Two-tailed                  | t=3.352, df=4  | -19.78 to -1.858                            |
| S2B          | FT240 pscram-miR vs pmiR-181a 1-0.8   | Unpaired t test       | 0.0071  | **              | Yes                                 | Two-tailed                  | t=5.083, df=4  | -42.54 to -12.48                            |
| S2B          | FT246 pscram-miR vs pmiR-181a 1-0.8   | Unpaired t test       | <0.0001 | ****            | Yes                                 | Two-tailed                  | t=22.23, df=4  | -71.52 to -55.64                            |
| S2B          | FT240 pscram-miR vs pmiR-181a 0.8-0.6 | Unpaired t test       | 0.0378  | *               | Yes                                 | Two-tailed                  | t=3.057, df=4  | 1.843 to 38.34                              |
| S2B          | FT246 pscram-miR vs pmiR-181a 0.8-0.6 | Unpaired t test       | 0.0003  | ***             | Yes                                 | Two-tailed                  | t=11.30, df=4  | 32.33 to 53.39                              |
| S2B          | FT240 pscram-miR vs pmiR-181a 0.6-0.3 | Unpaired t test       | 0.0311  | *               | Yes                                 | Two-tailed                  | t=3.261, df=4  | 1.102 to 13.74                              |
| S2B          | FT246 pscram-miR vs pmiR-181a 0.6-0.3 | Unpaired t test       | 0.0005  | ***             | Yes                                 | Two-tailed                  | t=10.37, df=4  | 15.17 to 26.26                              |

**Supplemental Table 13: Supplemental Figure 3 Statistical Tests**

| Figure Panel | Groups Compared                 | Statistical Test Used | Chi-square, df | z     | P value | P value summary | One- or two-sided | Statistically significant (P < 0.05)? |
|--------------|---------------------------------|-----------------------|----------------|-------|---------|-----------------|-------------------|---------------------------------------|
| S3A          | FT237 pscram-miR vs pmiR-181a B | Chi Square            | 49.62, 1       | 7.044 | <0.0001 | ****            | Two-sided         | Yes                                   |
| S3A          | FT237 pscram-miR vs antimiR B   | Chi Square            | 0.000, 1       | 0     | >0.9999 | ns              | Two-sided         | No                                    |
| S3A          | FT237 pscram-miR vs pmiR-181a G | Chi Square            | 97.20, 1       | 9.859 | <0.0001 | ****            | Two-sided         | Yes                                   |
| S3A          | FT237 pscram-miR vs antimiR G   | Chi Square            | 25.60, 1       | 5.06  | <0.0001 | ****            | Two-sided         | Yes                                   |
| S3A          | FT237 pscram-miR vs pmiR-181a Y | Chi Square            | 8.292, 1       | 2.88  | 0.004   | **              | Two-sided         | Yes                                   |
| S3A          | FT237 pscram-miR vs antimiR Y   | Chi Square            | 19.64, 1       | 4.432 | <0.0001 | ****            | Two-sided         | Yes                                   |
| S3A          | FT237 pscram-miR vs pmiR-181a R | Chi Square            | 67.01, 1       | 8.186 | <0.0001 | ****            | Two-sided         | Yes                                   |
| S3A          | FT237 pscram-miR vs antimiR R   | Chi Square            | 4.138, 1       | 2.034 | 0.0419  | *               | Two-sided         | Yes                                   |

  

| Figure Panel | Groups Compared               | Statistical Test Used | P value | P value summary | Significantly different (P < 0.05)? | One- or two-tailed P value? | t, df         | Difference of Means 95% Confidence Interval |
|--------------|-------------------------------|-----------------------|---------|-----------------|-------------------------------------|-----------------------------|---------------|---------------------------------------------|
| S3B          | FT237 pscram-miR vs pmiR-181a | Unpaired t test       | <0.0001 | ****            | Yes                                 | Two-tailed                  | t=32.98, df=4 | 18.10 to 21.43                              |
| S3B          | FT237 pscram-miR vs antimiR   | Unpaired t test       | 0.0012  | **              | Yes                                 | Two-tailed                  | t=8.259, df=4 | 5.489 to 11.05                              |
| S3B          | FT237 pmiR-181a vs antimiR    | Unpaired t test       | 0.0003  | ***             | Yes                                 | Two-tailed                  | t=11.45, df=4 | -14.29 to -8.712                            |
| S3B          | FT240 pscram-miR vs pmiR-181a | Unpaired t test       | 0.0043  | **              | Yes                                 | Two-tailed                  | t=5.831, df=4 | 6.115 to 17.23                              |
| S3B          | FT246 pscram-miR vs pmiR-181a | Unpaired t test       | 0.0035  | **              | Yes                                 | Two-tailed                  | t=6.178, df=4 | 6.682 to 17.59                              |

**Supplemental Table 14: Supplemental Figure 3 Statistical Tests**

| Figure Panel | Groups Compared                  | Statistical Test Used | Chi-square, df | z       | P value | P value summary | One- or two-sided | Statistically significant (P < 0.05)? |
|--------------|----------------------------------|-----------------------|----------------|---------|---------|-----------------|-------------------|---------------------------------------|
| S4B          | FT237 pscram-miR vs pmiR-181a B  | Chi Square            | 3.920, 1       | 1.98    | 0.0477  | *               | Two-sided         | Yes                                   |
| S4B          | FT237 pscram-miR vs antimiR B    | Chi Square            | 3.875, 1       | 1.969   | 0.049   | *               | Two-sided         | Yes                                   |
| S4C          | FT237 pscram-miR vs pmiR-181a p  | Chi Square            | 13.53, 1       | 3.679   | 0.0002  | ***             | Two-sided         | Yes                                   |
| S4C          | FT237 pscram-miR vs antimiR p    | Chi Square            | 1.220, 1       | 1.105   | 0.2693  | ns              | Two-sided         | No                                    |
| S4C          | FT237 pscram-miR vs pmiR-181a db | Chi Square            | 0.001209, 1    | 0.03477 | 0.9723  | ns              | Two-sided         | No                                    |
| S4C          | FT237 pscram-miR vs antimiR db   | Chi Square            | 1.057, 1       | 1.028   | 0.3039  | ns              | Two-sided         | No                                    |
| S4C          | FT237 pscram-miR vs pmiR-181a mb | Chi Square            | 2.141, 1       | 1.463   | 0.1434  | ns              | Two-sided         | No                                    |
| S4C          | FT237 pscram-miR vs antimiR mb   | Chi Square            | NA             |         |         |                 |                   |                                       |
| S4C          | FT237 pscram-miR vs pmiR-181a lb | Chi Square            | 14.92, 1       | 3.863   | 0.0001  | ***             | Two-sided         | Yes                                   |
| S4C          | FT237 pscram-miR vs antimiR lb   | Chi Square            | NA             |         |         |                 |                   |                                       |
| S4C          | FT237 pscram-miR vs pmiR-181a g  | Chi Square            | 1.567, 1       | 1.252   | 0.2106  | ns              | Two-sided         | No                                    |
| S4C          | FT237 pscram-miR vs antimiR g    | Chi Square            | 5.032, 1       | 2.243   | 0.0249  | *               | Two-sided         | Yes                                   |
| S4C          | FT237 pscram-miR vs pmiR-181a o  | Chi Square            | 0.001209, 1    | 0.03477 | 0.9723  | ns              | Two-sided         | No                                    |
| S4C          | FT237 pscram-miR vs antimiR o    | Chi Square            | 2.301, 1       | 1.517   | 0.1293  | ns              | Two-sided         | No                                    |
| S4C          | FT237 pscram-miR vs pmiR-181a r  | Chi Square            | 2.005, 1       | 1.416   | 0.1568  | ns              | Two-sided         | No                                    |
| S4C          | FT237 pscram-miR vs antimiR r    | Chi Square            | 2.954, 1       | 1.719   | 0.0857  | ns              | Two-sided         | No                                    |

**Supplemental Table 15: Supplemental Figure 6 Statistical Tests**

| Figure Panel | Groups Compared               | Statistical Test Used | P value | P value summary | Significantly different (P < 0.05)? | One- or two-tailed P value? | t, df         | Difference of Means 95% Confidence Interval |
|--------------|-------------------------------|-----------------------|---------|-----------------|-------------------------------------|-----------------------------|---------------|---------------------------------------------|
| S6A          | FT240 pscram-miR vs pmiR-181a | Unpaired t test       | 0.0012  | **              | Yes                                 | Two-tailed                  | t=8.188, df=4 | -0.6963 to -0.3437                          |
| S6A          | FT246 pscram-miR vs pmiR-181a | Unpaired t test       | <0.0001 | ****            | Yes                                 | Two-tailed                  | t=29.43, df=4 | -0.7515 to -0.6219                          |
| S6B          | FT240 pscram-miR vs pmiR-181a | Unpaired t test       | <0.0001 | ****            | Yes                                 | Two-tailed                  | t=30.90, df=4 | -0.3003 to -0.2507                          |
| S6B          | FT246 pscram-miR vs pmiR-181a | Unpaired t test       | 0.0004  | ***             | Yes                                 | Two-tailed                  | t=10.87, df=4 | -0.4813 to -0.2854                          |
| S6C          | FT240 pscram-miR vs pmiR-181a | Unpaired t test       | 0.0001  | ***             | Yes                                 | Two-tailed                  | t=15.30, df=4 | -0.9412 to -0.6521                          |
| S6C          | FT246 pscram-miR vs pmiR-181a | Unpaired t test       | 0.0014  | **              | Yes                                 | Two-tailed                  | t=7.938, df=4 | -0.8368 to -0.4032                          |
| S6D          | FT240 pscram-miR vs pmiR-181a | Unpaired t test       | <0.0001 | ****            | Yes                                 | Two-tailed                  | t=42.14, df=4 | -0.6702 to -0.5874                          |
| S6D          | FT246 pscram-miR vs pmiR-181a | Unpaired t test       | 0.0001  | ***             | Yes                                 | Two-tailed                  | t=14.14, df=4 | -0.6859 to -0.4607                          |

**Supplemental Table 16: Supplemental Figure 7 Statistical Tests**

| Figure Panel | Groups Compared                       | Statistical Test Used | P value | P value summary | Significantly different (P < 0.05)? | One- or two-tailed P value? | t, df          | Difference of Means 95% Confidence Interval |
|--------------|---------------------------------------|-----------------------|---------|-----------------|-------------------------------------|-----------------------------|----------------|---------------------------------------------|
| S7A          | FT237 pscram-miR vs pmiR-181a d2      | Unpaired t test       | 0.0002  | ***             | Yes                                 | Two-tailed                  | t=12.32, df=4  | 1.501 to 2.375                              |
| S7A          | FT237 pscram-miR vs pshrb1 d2         | Unpaired t test       | <0.0001 | ****            | Yes                                 | Two-tailed                  | t=34.88, df=4  | 1.599 to 1.875                              |
| S7A          | FT237 pscram-miR vs pmiR-181a d4      | Unpaired t test       | <0.0001 | ****            | Yes                                 | Two-tailed                  | t=45.80, df=4  | 3.248 to 3.667                              |
| S7A          | FT237 pscram-miR vs pshrb1 d4         | Unpaired t test       | <0.0001 | ****            | Yes                                 | Two-tailed                  | t=89.28, df=4  | 4.070 to 4.332                              |
| S7A          | FT237 pscram-miR vs pmiR-181a d6      | Unpaired t test       | <0.0001 | ****            | Yes                                 | Two-tailed                  | t=15.86, df=4  | 5.471 to 7.794                              |
| S7A          | FT237 pscram-miR vs pshrb1 d6         | Unpaired t test       | <0.0001 | ****            | Yes                                 | Two-tailed                  | t=52.81, df=4  | 6.522 to 7.246                              |
| S7A          | FT237 pscram-miR vs pmiR-181a d8      | Unpaired t test       | <0.0001 | ****            | Yes                                 | Two-tailed                  | t=25.76, df=4  | 11.06 to 13.73                              |
| S7A          | FT237 pscram-miR vs pshrb1 d8         | Unpaired t test       | <0.0001 | ****            | Yes                                 | Two-tailed                  | t=80.52, df=4  | 12.01 to 12.87                              |
| S7A          | FT237 pscram-miR vs pmiR-181a d10     | Unpaired t test       | <0.0001 | ****            | Yes                                 | Two-tailed                  | t=40.05, df=4  | 13.45 to 15.45                              |
| S7A          | FT237 pscram-miR vs pshrb1 d10        | Unpaired t test       | <0.0001 | ****            | Yes                                 | Two-tailed                  | t=60.88, df=4  | 12.73 to 13.94                              |
| S7A          | FT237 pmiR-181a vs pshrb1 d8          | Unpaired t test       | 0.9207  | ns              | No                                  | Two-tailed                  | t=0.1060, df=4 | -1.343 to 1.450                             |
| S7A          | FT237 pmiR-181a vs pshrb1 d10         | Unpaired t test       | 0.0441  | *               | Yes                                 | Two-tailed                  | t=2.900, df=4  | -2.186 to -0.04770                          |
| S7B          | FT237 pscram-miR vs pmiR-181a         | Unpaired t test       | <0.0001 | ****            | Yes                                 | Two-tailed                  | t=31.91, df=6  | 4.572 to 5.332                              |
| S7B          | FT237 pscram-miR vs pshrb1            | Unpaired t test       | <0.0001 | ****            | Yes                                 | Two-tailed                  | t=43.41, df=6  | 4.946 to 5.536                              |
| S7B          | FT237 pmiR-181a vs pshrb1             | Unpaired t test       | 0.1922  | ns              | No                                  | Two-tailed                  | t=1.469, df=6  | -0.1923 to 0.7700                           |
| S7C          | FT237 pscram-miR vs pmiR-181a 1-0.8   | Unpaired t test       | 0.0005  | ***             | Yes                                 | Two-tailed                  | t=10.22, df=4  | -87.35 to -50.02                            |
| S7C          | FT237 pscram-miR vs pshrb1 1-0.8      | Unpaired t test       | 0.0208  | *               | Yes                                 | Two-tailed                  | t=3.704, df=4  | -42.41 to -6.070                            |
| S7C          | FT237 pmiR-181a vs pshrb1 1-0.8       | Unpaired t test       | 0.0004  | ***             | Yes                                 | Two-tailed                  | t=10.70, df=4  | 32.91 to 55.98                              |
| S7C          | FT237 pscram-miR vs pmiR-181a 0.8-0.6 | Unpaired t test       | 0.001   | **              | Yes                                 | Two-tailed                  | t=8.586, df=4  | 28.10 to 54.96                              |
| S7C          | FT237 pscram-miR vs pshrb1 0.8-0.6    | Unpaired t test       | 0.0403  | *               | Yes                                 | Two-tailed                  | t=2.991, df=4  | 1.037 to 27.88                              |
| S7C          | FT237 pmiR-181a vs pshrb1 0.8-0.6     | Unpaired t test       | 0.0002  | ***             | Yes                                 | Two-tailed                  | t=13.15, df=4  | -32.79 to -21.35                            |
| S7C          | FT237 pscram-miR vs pmiR-181a 0.6-0.3 | Unpaired t test       | 0.0007  | ***             | Yes                                 | Two-tailed                  | t=9.597, df=4  | 19.42 to 35.23                              |
| S7C          | FT237 pscram-miR vs pshrb1 0.6-0.3    | Unpaired t test       | 0.0222  | *               | Yes                                 | Two-tailed                  | t=3.626, df=4  | 2.291 to 17.26                              |
| S7C          | FT237 pmiR-181a vs pshrb1 0.6-0.3     | Unpaired t test       | 0.0017  | **              | Yes                                 | Two-tailed                  | t=7.481, df=4  | -24.06 to -11.04                            |
| S7D          | FT237 pscram-miR vs pmiR-181a         | Unpaired t test       | <0.0001 | ****            | Yes                                 | Two-tailed                  | t=16.54, df=4  | 22.70 to 31.85                              |
| S7D          | FT237 pscram-miR vs pshrb1            | Unpaired t test       | 0.0016  | **              | Yes                                 | Two-tailed                  | t=7.598, df=4  | 11.35 to 24.43                              |
| S7D          | FT237 pmiR-181a vs pshrb1             | Unpaired t test       | 0.0169  | *               | Yes                                 | Two-tailed                  | t=3.947, df=4  | -15.99 to -2.784                            |

**Supplemental Table 17: Supplemental Figure 8 Statistical Tests**

| Figure Panel | Groups Compared                       | Statistical Test Used | P value | P value summary | Significantly different (P < 0.05)? | One- or two-tailed P value? | t, df           | Difference of Means 95% Confidence Interval |
|--------------|---------------------------------------|-----------------------|---------|-----------------|-------------------------------------|-----------------------------|-----------------|---------------------------------------------|
| S8A          | FT194 pscram-miR vs pmiR-181a d2      | Unpaired t test       | 0.9301  | ns              | No                                  | Two-tailed                  | t=0.09334, df=4 | -0.5462 to 0.5842                           |
| S8A          | FT194 pscram-miR vs pmiR-181a d4      | Unpaired t test       | 0.0823  | ns              | No                                  | Two-tailed                  | t=2.307, df=4   | -0.2335 to 2.526                            |
| S8A          | FT194 pscram-miR vs pmiR-181a d6      | Unpaired t test       | 0.1035  | ns              | No                                  | Two-tailed                  | t=2.101, df=4   | -0.4017 to 2.901                            |
| S8B          | FT194 pscram-miR vs pmiR-181a 1-0.8   | Unpaired t test       | 0.8342  | ns              | No                                  | Two-tailed                  | t=0.2163, df=8  | -11.42 to 13.79                             |
| S8B          | FT194 pscram-miR vs pmiR-181a 0.8-0.6 | Unpaired t test       | 0.5193  | ns              | No                                  | Two-tailed                  | t=0.6741, df=8  | -12.57 to 22.95                             |
| S8B          | FT194 pscram-miR vs pmiR-181a 0.6-0.3 | Unpaired t test       | 0.2934  | ns              | No                                  | Two-tailed                  | t=1.124, df=8   | -19.44 to 6.697                             |
| S8C          | FT194 pscram-miR vs pmiR-181a         | Unpaired t test       | 0.2442  | ns              | No                                  | Two-tailed                  | t=1.364, df=4   | -7.574 to 22.21                             |
| S8D          | FT194 pscram-miR vs pmiR-181a         | Unpaired t test       | 0.2014  | ns              | No                                  | Two-tailed                  | t=1.527, df=4   | -0.4978 to 0.1445                           |
| S8E          | FT194 pscram-miR vs pmiR-181a g2m     | Unpaired t test       | 0.6778  | ns              | No                                  | Two-tailed                  | t=0.4474, df=4  | -6.504 to 4.699                             |
| S8E          | FT194 pscram-miR vs pmiR-181a >4n     | Unpaired t test       | 0.8447  | ns              | No                                  | Two-tailed                  | t=0.2089, df=4  | -3.912 to 3.365                             |

**Supplemental Table 18: Supplemental Figure 9 Statistical Tests**

| Figure Panel | Groups Compared                    | Statistical Test Used | P value | P value summary | Significantly different (P < 0.05)? | One- or two-tailed P value? | t, df          | Difference of Means 95% Confidence Interval |
|--------------|------------------------------------|-----------------------|---------|-----------------|-------------------------------------|-----------------------------|----------------|---------------------------------------------|
| S9B          | FT237 pscram-miR vs pmiR-181a v l  | Unpaired t test       | 0.2063  | ns              | No                                  | Two-tailed                  | t=1.507, df=4  | -0.2686 to 0.9062                           |
| S9B          | FT237 pscram-miR vs anti miR v l   | Unpaired t test       | <0.0001 | ****            | Yes                                 | Two-tailed                  | t=29.13, df=4  | 1.715 to 2.076                              |
| S9B          | FT237 pmiR-181a vs anti miR v l    | Unpaired t test       | <0.0001 | ****            | Yes                                 | Two-tailed                  | t=27.21, df=4  | 1.616 to 1.983                              |
| S9B          | FT237 pscram-miR vs pmiR-181a c l  | Unpaired t test       | 0.0001  | ***             | Yes                                 | Two-tailed                  | t=15.23, df=4  | -194.0 to -134.2                            |
| S9B          | FT237 pscram-miR vs anti miR c l   | Unpaired t test       | 0.0005  | ***             | Yes                                 | Two-tailed                  | t=10.57, df=4  | -148.1 to -86.49                            |
| S9B          | FT237 pmiR-181a vs anti miR c i    | Unpaired t test       | 0.0003  | ***             | Yes                                 | Two-tailed                  | t=11.78, df=4  | 35.78 to 57.84                              |
| S9B          | FT237 pscram-miR vs pmiR-181a v t  | Unpaired t test       | <0.0001 | ****            | Yes                                 | Two-tailed                  | t=29.34, df=4  | -0.3300 to -0.2730                          |
| S9B          | FT237 pscram-miR vs anti miR v t   | Unpaired t test       | <0.0001 | ****            | Yes                                 | Two-tailed                  | t=16.05, df=4  | 1.857 to 2.633                              |
| S9B          | FT237 pmiR-181a vs anti miR v t    | Unpaired t test       | <0.0001 | ****            | Yes                                 | Two-tailed                  | t=18.16, df=4  | 2.157 to 2.936                              |
| S9B          | FT237 pscram-miR vs pmiR-181a c t  | Unpaired t test       | <0.0001 | ****            | Yes                                 | Two-tailed                  | t=55.52, df=4  | -17.76 to -16.07                            |
| S9B          | FT237 pscram-miR vs anti miR c t   | Unpaired t test       | <0.0001 | ****            | Yes                                 | Two-tailed                  | t=32.62, df=4  | -11.77 to -9.922                            |
| S9B          | FT237 pmiR-181a vs anti miR c t    | Unpaired t test       | <0.0001 | ****            | Yes                                 | Two-tailed                  | t=18.09, df=4  | 5.137 to 7.000                              |
| S9B          | FT237 pscram-miR vs pmiR-181a v cx | Unpaired t test       | 0.0026  | **              | Yes                                 | Two-tailed                  | t=6.674, df=4  | -0.5100 to -0.2103                          |
| S9B          | FT237 pscram-miR vs anti miR v cx  | Unpaired t test       | 0.1988  | ns              | No                                  | Two-tailed                  | t=1.538, df=4  | -0.4054 to 1.412                            |
| S9B          | FT237 pmiR-181a vs anti miR v cx   | Unpaired t test       | 0.0599  | ns              | No                                  | Two-tailed                  | t=2.603, df=4  | -0.05750 to 1.785                           |
| S9B          | FT237 pscram-miR vs pmiR-181a c cx | Unpaired t test       | 0.0018  | **              | Yes                                 | Two-tailed                  | t=7.340, df=4  | -9086 to -4099                              |
| S9B          | FT237 pscram-miR vs anti miR c cx  | Unpaired t test       | 0.0027  | **              | Yes                                 | Two-tailed                  | t=6.636, df=4  | -8543 to -3503                              |
| S9B          | FT237 pmiR-181a vs anti miR c cx   | Unpaired t test       | 0.0198  | *               | Yes                                 | Two-tailed                  | t=3.761, df=4  | 149.1 to 989.9                              |
| S9C          | FT237 pscram-miR vs pmiR-181a c    | Unpaired t test       | 0.0002  | ***             | Yes                                 | Two-tailed                  | t=12.55, df=4  | -5460 to -3482                              |
| S9C          | FT237 pscram-miR vs anti miR c     | Unpaired t test       | 0.0002  | ***             | Yes                                 | Two-tailed                  | t=13.35, df=4  | -2344 to -1537                              |
| S9C          | FT237 pscram-miR vs shrb1 c        | Unpaired t test       | 0.0004  | ***             | Yes                                 | Two-tailed                  | t=10.65, df=4  | -1695 to -994.0                             |
| S9C          | FT237 pmiR-181a vs anti miR c      | Unpaired t test       | 0.002   | **              | Yes                                 | Two-tailed                  | t=7.221, df=4  | 1558 to 3503                                |
| S9C          | FT237 pmiR-181a vs shrb1 c         | Unpaired t test       | 0.0008  | ***             | Yes                                 | Two-tailed                  | t=9.117, df=4  | 2174 to 4078                                |
| S9D          | FT237 pscram-miR vs pmiR-181a      | Unpaired t test       | 0.0025  | **              | Yes                                 | Two-tailed                  | t=6.755, df=4  | 0.7347 to 1.760                             |
| S9D          | FT237 pscram-miR vs shst1          | Unpaired t test       | 0.0057  | **              | Yes                                 | Two-tailed                  | t=5.401, df=4  | 0.5742 to 1.789                             |
| S9D          | FT237 pscram-miR vs shst2          | Unpaired t test       | 0.0046  | **              | Yes                                 | Two-tailed                  | t=5.713, df=4  | 0.4438 to 1.283                             |
| S9D          | FT237 pmiR-181a vs shst1           | Unpaired t test       | 0.8292  | ns              | No                                  | Two-tailed                  | t=0.2302, df=4 | -0.8607 to 0.7289                           |
| S9D          | FT237 pmiR-181a vs shst2           | Unpaired t test       | 0.1828  | ns              | No                                  | Two-tailed                  | t=1.609, df=4  | -1.047 to 0.2785                            |
| S9D          | FT237 pscram-miR vs pmiR-181a      | Unpaired t test       | 0.0079  | **              | Yes                                 | Two-tailed                  | t=4.922, df=4  | 0.6480 to 2.325                             |
| S9D          | FT237 pscram-miR vs scram stoe     | Unpaired t test       | <0.0001 | ****            | Yes                                 | Two-tailed                  | t=34.83, df=4  | -0.9789 to -0.8344                          |
| S9D          | FT237 pscram-miR vs 181a stoe      | Unpaired t test       | 0.6978  | ns              | No                                  | Two-tailed                  | t=0.4174, df=4 | -0.7142 to 0.5276                           |
| S9D          | FT237 pmiR-181a vs scram stoe      | Unpaired t test       | <0.0001 | ****            | Yes                                 | Two-tailed                  | t=34.83, df=4  | -0.9789 to -0.8344                          |
| S9D          | FT237 pmiR-181a vs 181a stoe       | Unpaired t test       | 0.6978  | ns              | No                                  | Two-tailed                  | t=0.4174, df=4 | -0.7142 to 0.5276                           |
| S9E          | FT237 pscram-miR v vs pscam-miR c  | Unpaired t test       | 0.0008  | ***             | Yes                                 | Two-tailed                  | t=9.171, df=4  | 6.740 to 12.59                              |
| S9E          | FT237 pscram-miR v vs pmiR-181a v  | Unpaired t test       | 0.1493  | ns              | No                                  | Two-tailed                  | t=1.782, df=4  | -5.116 to 1.116                             |
| S9E          | FT237 pscram-miR v vs pmiR-181a c  | Unpaired t test       | 0.121   | ns              | No                                  | Two-tailed                  | t=1.964, df=4  | -4.827 to 0.8274                            |
| S9E          | FT237 pscram-miR v vs shst1 v      | Unpaired t test       | 0.1354  | ns              | No                                  | Two-tailed                  | t=1.867, df=4  | -4.975 to 0.9750                            |
| S9E          | FT237 pscram-miR v vs shst1 c      | Unpaired t test       | 0.139   | ns              | No                                  | Two-tailed                  | t=1.844, df=4  | -4.733 to 0.9553                            |
| S9E          | FT237 pscram-miR v vs shst2 v      | Unpaired t test       | 0.1544  | ns              | No                                  | Two-tailed                  | t=1.753, df=4  | -4.880 to 1.102                             |
| S9E          | FT237 pscram-miR v vs shst2 c      | Unpaired t test       | 0.1951  | ns              | No                                  | Two-tailed                  | t=1.554, df=4  | -4.954 to 1.398                             |
| S9E          | FT237 pscram-miR v vs scram stoe v | Unpaired t test       | 0.0022  | **              | Yes                                 | Two-tailed                  | t=7.012, df=4  | 17.15 to 39.63                              |
| S9E          | FT237 pscram-miR v vs scram stoe c | Unpaired t test       | 0.0001  | ***             | Yes                                 | Two-tailed                  | t=15.07, df=4  | 44.32 to 64.34                              |
| S9E          | FT237 pscram-miR v vs p181a stoe v | Unpaired t test       | 0.0959  | ns              | No                                  | Two-tailed                  | t=2.169, df=4  | -5.066 to 0.6220                            |
| S9E          | FT237 pscram-miR v vs 181a stoe c  | Unpaired t test       | 0.072   | ns              | No                                  | Two-tailed                  | t=2.429, df=4  | -5.238 to 0.3491                            |



**Supplemental Table 19: Supplemental Figure 9 Statistical Tests cont**

| Figure Panel | Groups Compared                     | Statistical Test Used | P value | P value summary | Significantly different (P < 0.05)? | One- or two-tailed P value? | t, df         | Difference of Means 95% Confidence Interval |
|--------------|-------------------------------------|-----------------------|---------|-----------------|-------------------------------------|-----------------------------|---------------|---------------------------------------------|
| S9E          | FT237 pscram-miR c vs pmiR-181a c   | Unpaired t test       | <0.0001 | ****            | Yes                                 | Two-tailed                  | t=30.31, df=4 | -12.74 to -10.60                            |
| S9E          | FT237 pscram-miR c vs shst1 c       | Unpaired t test       | <0.0001 | ****            | Yes                                 | Two-tailed                  | t=28.84, df=4 | -12.67 to -10.44                            |
| S9E          | FT237 pscram-miR c vs shst2 c       | Unpaired t test       | <0.0001 | ****            | Yes                                 | Two-tailed                  | t=17.66, df=4 | -13.24 to -9.646                            |
| S9E          | FT237 pscram-miR c vs scram stoe c  | Unpaired t test       | 0.0002  | ***             | Yes                                 | Two-tailed                  | t=12.83, df=4 | 35.00 to 54.33                              |
| S9E          | FT237 pscram-miR c vs 181a stoe c   | Unpaired t test       | <0.0001 | ****            | Yes                                 | Two-tailed                  | t=34.47, df=4 | -13.09 to -11.14                            |
| S9E          | FT237 pscram-miR v vs pscram stoe c | Unpaired t test       | 0.0077  | **              | Yes                                 | Two-tailed                  | t=4.957, df=4 | 11.41 to 40.48                              |

**Supplemental Table 20: Supplemental Figure 10 Statistical Tests**

| Figure Panel | Groups Compared                      | Statistical Test Used | P value | P value summary | Significantly different (P < 0.05)? | One- or two-tailed P value? | t, df         | Difference of Means 95% Confidence Interval |
|--------------|--------------------------------------|-----------------------|---------|-----------------|-------------------------------------|-----------------------------|---------------|---------------------------------------------|
| S10A         | FT237 pscram-miR vs pmiR-181a        | Unpaired t test       | 0.0011  | **              | Yes                                 | Two-tailed                  | t=8.390, df=4 | -0.4370 to -0.2197                          |
| S10A         | FT237 pscram-miR vs scram stoe       | Unpaired t test       | 0.0013  | **              | Yes                                 | Two-tailed                  | t=8.060, df=4 | 3.461 to 7.099                              |
| S10A         | FT237 pscram-miR vs 181a stoe        | Unpaired t test       | 0.0005  | ***             | Yes                                 | Two-tailed                  | t=10.55, df=4 | 4.076 to 6.988                              |
| S10A         | FT237 pmiR-181a vs scram stoe        | Unpaired t test       | 0.001   | **              | Yes                                 | Two-tailed                  | t=8.546, df=4 | 3.787 to 7.431                              |
| S10A         | FT237 pmiR-181a vs 181a stoe         | Unpaired t test       | 0.0004  | ***             | Yes                                 | Two-tailed                  | t=11.15, df=4 | 4.401 to 7.320                              |
| S10B         | FT237 pscram-miR v vs pscram-miR c   | Unpaired t test       | <0.0001 | ****            | Yes                                 | Two-tailed                  | t=55.98, df=4 | -0.6130 to -0.5551                          |
| S10B         | FT237 pmiR-181a v vs pmiR-181a c     | Unpaired t test       | 0.0006  | ***             | Yes                                 | Two-tailed                  | t=9.910, df=4 | -0.1974 to -0.1110                          |
| S10B         | FT237 scram stoe v vs scram stoe c   | Unpaired t test       | <0.0001 | ****            | Yes                                 | Two-tailed                  | t=28.12, df=4 | -0.9198 to -0.7545                          |
| S10B         | FT237 181a stoe v vs 181a stoe c     | Unpaired t test       | 0.0001  | ***             | Yes                                 | Two-tailed                  | t=14.46, df=4 | -0.6209 to -0.4209                          |
| S10C         | FT237 pscram-miR vs pmiR-181a d2     | Unpaired t test       | 0.0003  | ***             | Yes                                 | Two-tailed                  | t=12.17, df=4 | 1.951 to 3.104                              |
| S10C         | FT237 pscram-miR vs scram stoe d2    | Unpaired t test       | 0.0088  | **              | Yes                                 | Two-tailed                  | t=4.782, df=4 | 0.3819 to 1.439                             |
| S10C         | FT237 pscram-miR vs 181a stoe d2     | Unpaired t test       | 0.0001  | ***             | Yes                                 | Two-tailed                  | t=14.33, df=4 | 1.839 to 2.723                              |
| S10C         | FT237 pscram-miR vs pmiR-181a d4     | Unpaired t test       | 0.0001  | ***             | Yes                                 | Two-tailed                  | t=14.67, df=4 | 5.224 to 7.663                              |
| S10C         | FT237 pscram-miR vs scram stoe d4    | Unpaired t test       | 0.0109  | *               | Yes                                 | Two-tailed                  | t=4.491, df=4 | 0.6191 to 2.624                             |
| S10C         | FT237 pscram-miR vs 181a stoe d4     | Unpaired t test       | 0.0003  | ***             | Yes                                 | Two-tailed                  | t=12.07, df=4 | 3.352 to 5.355                              |
| S10C         | FT237 pscram-miR vs pmiR-181a d8     | Unpaired t test       | 0.0012  | **              | Yes                                 | Two-tailed                  | t=8.247, df=4 | 6.722 to 13.54                              |
| S10C         | FT237 pscram-miR vs scram stoe d8    | Unpaired t test       | 0.3325  | ns              | No                                  | Two-tailed                  | t=1.102, df=4 | -1.892 to 4.380                             |
| S10C         | FT237 pscram-miR vs 181a stoe d8     | Unpaired t test       | 0.0185  | *               | Yes                                 | Two-tailed                  | t=3.840, df=4 | 1.519 to 9.450                              |
| S10D         | FT237 pscram-miR vs pmiR-181a        | Unpaired t test       | 0.0001  | ***             | Yes                                 | Two-tailed                  | t=15.12, df=4 | 14.70 to 21.30                              |
| S10D         | FT237 pscram-miR vs scram stoe       | Unpaired t test       | 0.1161  | ns              | No                                  | Two-tailed                  | t=2.000, df=4 | -1.592 to 0.2588                            |
| S10D         | FT237 pscram-miR vs 181a stoe        | Unpaired t test       | 0.0006  | ***             | Yes                                 | Two-tailed                  | t=10.00, df=4 | 4.816 to 8.518                              |
| S10D         | FT237 pmiR-181a vs scram stoe        | Unpaired t test       | <0.0001 | ****            | Yes                                 | Two-tailed                  | t=16.00, df=4 | -21.91 to -15.43                            |
| S10D         | FT237 pmiR-181a vs 181a stoe         | Unpaired t test       | 0.001   | ***             | Yes                                 | Two-tailed                  | t=8.707, df=4 | -14.95 to -7.719                            |
| S10F         | FT237 pscram-miR vs pmiR-181a g2m    | Unpaired t test       | <0.0001 | ****            | Yes                                 | Two-tailed                  | t=35.18, df=4 | 7.878 to 9.228                              |
| S10F         | FT237 pscram-miR vs scram stoe g2m   | Unpaired t test       | <0.0001 | ****            | Yes                                 | Two-tailed                  | t=88.32, df=4 | 21.93 to 23.36                              |
| S10F         | FT237 pscram-miR vs 181a stoe g2m    | Unpaired t test       | <0.0001 | ****            | Yes                                 | Two-tailed                  | t=76.95, df=4 | 30.88 to 33.19                              |
| S10F         | FT237 pscram-miR vs pmiR-181a >4n    | Unpaired t test       | <0.0001 | ****            | Yes                                 | Two-tailed                  | t=22.86, df=4 | 8.651 to 11.04                              |
| S10F         | FT237 pscram-miR vs scram stoe >4n   | Unpaired t test       | <0.0001 | ****            | Yes                                 | Two-tailed                  | t=27.57, df=4 | 13.25 to 16.22                              |
| S10F         | FT237 pscram-miR vs 181a stoe >4n    | Unpaired t test       | <0.0001 | ****            | Yes                                 | Two-tailed                  | t=16.70, df=4 | 7.145 to 9.995                              |
| S10F         | FT237 pscram-miR vs pmiR-181a sg1    | Unpaired t test       | 0.0161  | *               | Yes                                 | Two-tailed                  | t=4.002, df=4 | 0.3209 to 1.775                             |
| S10F         | FT237 pscram-miR vs scram stoe sg1   | Unpaired t test       | 0.0004  | ***             | Yes                                 | Two-tailed                  | t=10.93, df=4 | 1.707 to 2.869                              |
| S10F         | FT237 pscram-miR vs 181a stoe sg1    | Unpaired t test       | 0.0023  | **              | Yes                                 | Two-tailed                  | t=6.913, df=4 | 1.943 to 4.551                              |
| S10F         | FT237 pmiR-181a vs scram stoe sg1    | Unpaired t test       | 0.0167  | *               | Yes                                 | Two-tailed                  | t=3.961, df=4 | 0.3707 to 2.109                             |
| S10F         | FT237 pmiR-181a vs 181a stoe sg1     | Unpaired t test       | 0.0137  | *               | Yes                                 | Two-tailed                  | t=4.195, df=4 | 0.7438 to 3.655                             |
| S10F         | FT237 pscram-miR vs scram stoe sg1fc | Unpaired t test       | 0.0084  | **              | Yes                                 | Two-tailed                  | t=4.844, df=4 | 1.453 to 5.355                              |
| S10F         | FT237 pmiR-181a vs 181a stoe sg1fc   | Unpaired t test       | 0.035   | *               | Yes                                 | Two-tailed                  | t=3.136, df=4 | 0.1312 to 2.158                             |
| S10F         | FT237 pscram-miR vs scram stoe g2mfc | Unpaired t test       | <0.0001 | ****            | Yes                                 | Two-tailed                  | t=42.24, df=4 | 1.003 to 1.144                              |
| S10F         | FT237 pmiR-181a vs 181a stoe g2mfc   | Unpaired t test       | <0.0001 | ****            | Yes                                 | Two-tailed                  | t=40.93, df=4 | 0.7453 to 0.8538                            |
| S10F         | FT237 pscram-miR vs scram stoe >4nfc | Unpaired t test       | <0.0001 | ****            | Yes                                 | Two-tailed                  | t=75.32, df=4 | 0.7920 to 0.8526                            |
| S10F         | FT237 pmiR-181a vs 181a stoe >4nfc   | Unpaired t test       | <0.0001 | ****            | Yes                                 | Two-tailed                  | t=77.74, df=4 | -2.007 to -1.868                            |
| S10G         | FT237 pscram-miR vs pmiR-181a        | Unpaired t test       | <0.0001 | ****            | Yes                                 | Two-tailed                  | t=18.69, df=4 | 15.49 to 20.89                              |
| S10G         | FT237 pscram-miR vs scram stoe       | Unpaired t test       | 0.2818  | ns              | No                                  | Two-tailed                  | t=1.243, df=4 | -1.193 to 3.128                             |
| S10G         | FT237 pscram-miR vs 181a stoe        | Unpaired t test       | 0.1707  | ns              | No                                  | Two-tailed                  | t=1.668, df=4 | -1.845 to 7.396                             |
| S10G         | FT237 pmiR-181a vs scram stoe        | Unpaired t test       | <0.0001 | ****            | Yes                                 | Two-tailed                  | t=23.39, df=4 | -19.27 to -15.18                            |
| S10G         | FT237 pmiR-181a vs 181a stoe         | Unpaired t test       | 0.0007  | ***             | Yes                                 | Two-tailed                  | t=9.369, df=4 | -19.98 to -10.85                            |
| S10H         | FT237 pscram-miR vs pmiR-181a        | Unpaired t test       | 0.0009  | ***             | Yes                                 | Two-tailed                  | t=8.868, df=4 | 0.5574 to 1.065                             |
| S10H         | FT237 pscram-miR vs scram stoe       | Unpaired t test       | <0.0001 | ****            | Yes                                 | Two-tailed                  | t=22.07, df=4 | -0.9118 to -0.7081                          |
| S10H         | FT237 pscram-miR vs 181a stoe        | Unpaired t test       | <0.0001 | ****            | Yes                                 | Two-tailed                  | t=48.66, df=4 | -0.6772 to -0.6041                          |
| S10H         | FT237 pmiR-181a vs scram stoe        | Unpaired t test       | <0.0001 | ****            | Yes                                 | Two-tailed                  | t=16.45, df=4 | -1.895 to -1.348                            |
| S10H         | FT237 pmiR-181a vs 181a stoe         | Unpaired t test       | <0.0001 | ****            | Yes                                 | Two-tailed                  | t=15.71, df=4 | -1.709 to -1.195                            |
